# Supplementary material
Source: PubMed Central journal article supplement (PMC5584656)
Supplement: NIHMS73120-supplement-1.pdf [file NIHMS73120-supplement-1.pdf]

## Supplementary Information for:

### Phylotranscriptomic consolidation of the jawed vertebrate timetree

Iker Irisarri, Denis Baurain, Henner Brinkmann, Frédéric Delsuc, Jean-Yves Sire, Alexander Kupfer, Jörn Petersen, Michael Jarek, Axel Meyer, Miguel Vences, Hervé Philippe

#### Supplementary Materials and Methods

- Transcriptome sequencing and assembly of 23 new transcriptomes
- Assembly of nuclear phylogenomic datasets
- Phylogenetic performance of transcriptomes in relation to sequencing effort
- Assembly of the mitogenomic datasets
- Phylogenetic inference
- Molecular dating
- Correlation of genome size and indels in protein-coding genes
- Correlation of nuclear substitution rates with genome size and species diversity
- Comparison of nuclear and mitochondrial substitution rates

#### Supplementary Tables and Figures

- Supplementary Table 1. Statistics of transcriptome sequencing effort, assembly and completeness
- Supplementary Table 2. Correlation among sequencing effort and transcriptome completeness
- Supplementary Table 3. Effect of alignment length on the recovery of nodes
- Supplementary Table 4. Recovery of 40 selected nodes by single genes from NoDP
- Supplementary Table 5. Topology tests performed on the nuclear test dataset
- Supplementary Table 6. Relationship between species diversity and substitution rates
- Supplementary Table 7. Bayesian correlation analysis performed in coevol
- Supplementary Table 8. Calibrations used in molecular dating analyses
- Supplementary Table 9. Divergence time estimates
- Supplementary Table 10. Taxon sampling of the nuclear datasets
- Supplementary Table 11. Taxon sampling of the mitochondrial datasets
- Supplementary Table 12. Non-vertebrate species used in BLASTP-based decontamination
- Supplementary Table 13. Model cross-validations performed in PhyloBayes

- Supplementary Figure 1. Comparison of datasets by quality and size
- Supplementary Figure 2. Flowchart of the new bioinformatics pipeline
- Supplementary Figure 3. ML phylogeny from NoDP under GTR+ $\Gamma$
- Supplementary Figure 4. ML phylogeny from the NoDP dataset
- Supplementary Figure 5. ASTRAL phylogeny from the NoDP dataset
- Supplementary Figure 6. BI phylogeny from 1DP under GTR+ $\Gamma$
- Supplementary Figure 7. BI phylogeny from 2DP under GTR+ $\Gamma$
- Supplementary Figure 8. ASTRAL phylogeny from the 1DP dataset
- Supplementary Figure 9. ASTRAL phylogeny from the 2DP dataset
- Supplementary Figure 10. BI from mitochondrial dataset (106 species) under CAT-GTR+ $\Gamma$
- Supplementary Figure 11. BI from mitochondrial dataset (106 species) under CAT+ $\Gamma$
- Supplementary Figure 12. ML from mitochondrial dataset (106 species) under GTR+ $\Gamma$
- Supplementary Figure 13. ML from mitochondrial dataset (106 species) under MTREV+ $\Gamma$
- Supplementary Figure 14. BI from mitochondrial dataset (95 species) under CAT-GTR+ $\Gamma$
- Supplementary Figure 15. BI from mitochondrial dataset (95 species) under CAT+ $\Gamma$
- Supplementary Figure 16. ML from mitochondrial dataset (95 species) under GTR+ $\Gamma$
- Supplementary Figure 17. ML from mitochondrial dataset (95 species) under MTREV+ $\Gamma$
- Supplementary Figure 18. Relationship between mitochondrial and nuclear substitution rates
- Supplementary Figure 19. Tree with IDs corresponding to Supplementary Tables 3, 4, 8, 9

#### Supplementary References

## Supplementary Materials and Methods

### Transcriptome sequencing and assembly of 23 new transcriptomes

Transcriptomes for the following ten amphibians (*Andrias davidianus*, *Calotriton asper*, *Discoglossus pictus*, *Geotrypetes seraphini*, *Hymenochirus curticeps*, *Megophrys nasuta*, *Pipa pipa*, *Proteus anguinus*, *Siren lacertina* and *Typhlonectes natans*) were generated at Leibniz Institute-DSMZ (German Collection of Microorganisms and Cell Cultures) as follows. Samples were taken from freshly sacrificed specimens and the variety of organs and tissues was maximized to allow the recovery of genes with tissue-specific expression, except *Andrias*, for which we used a skin biopsy preserved in liquid nitrogen. Samples were immediately homogenized in liquid nitrogen, transferred to TRIzol (Invitrogen, Carlsbad, CA, USA) and RNA was extracted using the guanidinium thiocyanate-phenol-chloroform method. Selection of mRNA used the PolyATtract mRNA Isolation System III (Promega, Mannheim, Germany). Sequencing was performed on Illumina MiSeq (2x250 bp paired-end; v2 chemistry, 500 cycles), each species using half a MiSeq flow cell. Transcriptomes were assembled *de novo* using the Trinity software package<sup>1</sup>. Likely coding regions were extracted using TransDecoder (included in the Trinity pipeline<sup>2</sup>) and functionally annotated by homology search against available sequence databases (using BLAST+ against SwissProt/Uniref90), protein domain identification (using HMMER against PFAM) and protein signal peptide and transmembrane domain prediction (using signalP/tmHMM).

Transcriptomes of eleven additional species (*Acipenser baerii*, *Amia calva*, *Lepisosteus platyrhincus*, *Pleurodeles waltl*, *Polypterus senegalus*, *Protopterus aethiopicus*, *Raja clavata*, *Rhinatrema bivittatum*, *Scyliorhinus canicula*, *Tarentola mauritanica* and *Typhlonectes compressicauda*) were obtained in the Evolution and Development of Skeleton group at the IBPS (Institut de Biologie Paris Seine) using a slightly different protocol. Individuals were sacrificed, their lower jaw dissected and immediately immersed in liquid nitrogen and pulverized. Total RNAs were then extracted and purified using RNeasy fibrous tissue Mini kit (Qiagen, France). Frozen RNAs were sequenced via RNA-seq using Illumina HiSeq2000 2x50 bp paired-end reads at GATC Biotech (Konstanz, Germany). *De novo* transcriptome assemblies from Illumina paired-end reads were performed at ISEM (Institut des Sciences de l'Evolution, Montpellier) using Trinity with default parameters. Expression values were obtained with SOAPdenovo-Trans (<http://soap.genomics.org.cn/SOAPdenovo-Trans.html>) with default settings. Details, assemblies and raw data for these eleven transcriptomes will be published elsewhere.

Transcriptomes for *Lepidosiren paradoxa* and *Neoceratodus forsteri* were obtained at the University of Konstanz (Germany) from a variety of tissues adequately stored in RNAlater. Total RNA was extracted with TRIzol (Invitrogen, Carlsbad, CA, USA), mRNA selected with poly-T and sequenced in a single lane of Illumina HiSeq2000 with 2x100 bp paired-end reads. Transcriptomes were assembled *de novo* using Trinity and Oases<sup>3</sup> under different parameterizations<sup>4</sup>.

Additionally, publicly available RNA-Seq data suitable for this study were downloaded from NCBI SRA (Supplementary Table 10) and transcriptomes were assembled using the Trinity software package with default parameters or the MIRA software package<sup>5</sup> with settings '-job=denovo,est,normal,solexa -SK:mnr=yes:nrr=10'.

### Assembly of nuclear phylogenomic datasets

Our taxon sampling comprised all major lineages of jawed vertebrates, including the 23 newly generated transcriptomes, and improved the sampling for several previously underrepresented lineages, especially within amphibians and lepidosaurians. Particular species were strategically chosen to minimize possible long-branch attraction artefacts, by selecting the

earliest branching and/or slower evolving species of each major clade (based on previous phylogenetic analyses), including the Elephant shark (the slowest-evolving vertebrate<sup>6</sup>), bichir, coelacanth, Australian lungfish, the caecilian *Rhinatrema*, *Andrias* and *Hynobius* salamanders, platypus, emu and ostrich, pleurodiran turtles or tuatara (the only exceptions where earliest-branching taxa could not be included due to sample unavailability were dibamid squamates and *Leiopelma* and *Ascaphus* frogs<sup>7,8</sup>).

Nuclear datasets were assembled using the new proposed pipeline summarized in Supplementary Fig. 2. Twenty one vertebrate proteomes were downloaded from Ensembl v.73 (*Anas platyrhynchos*, *Anolis carolinensis*, *Canis familiaris*, *Danio rerio*, *Dasybus novemcinctus*, *Gallus gallus*, *Homo sapiens*, *Latimeria chalumnae*, *Lepisosteus oculatus*, *Loxodonta africana*, *Macropus eugenii*, *Meleagris gallopavo*, *Monodelphis domestica*, *Mus musculus*, *Ornithorhynchus anatinus*, *Pelodiscus sinensis*, *Petromyzon marinus*, *Sarcophilus harrisii*, *Silurana tropicalis*, *Taeniopygia guttata*, *Takifugu rubripes*) and grouped into putative ortholog groups using USEARCH v.7.0.959<sup>9</sup> with parameters ‘-evaluate 1e-5 -accel 1’ and OrthoMCL v.2.0.3<sup>10</sup> with parameters ‘percentMatchCutoff=50, evaluateExponentCutoff=-5’ when loading UBLAST reports and an inflation parameter ‘-I=1.5’ when performing the Markov clustering itself. This created 24,177 gene clusters, that were filtered by requiring the presence of at least one sequence for each of the following groups: mammals, birds, reptiles + amphibians, spotted gar. This resulted in 11,656 gene clusters, which were aligned with MAFFT v7.127<sup>11</sup> with parameters ‘--quiet --localpair --maxiterate 5000 --reorder’ and positions of unreliable homology were discarded with Gblocks v0.91b<sup>12</sup> with default parameters. Six genes were excluded because Gblocks removed all positions.

In order to identify and address paralogy issues, we implemented a paralog-splitting pipeline based on single-gene trees. Alignments were subjected to phylogenetic inference with RAxML<sup>13</sup> under the LG+ $\Gamma$  model and the resulting trees were analysed using a custom Perl script, ParalogDetector.pl. Genes were classified into one of the following four categories: (i) single-copy genes, (ii) genes containing in-paralogs (i.e., multiple copies in a given species grouped in a monophyletic clade), (iii) genes with teleost-specific paralogs (produced by the teleost-specific whole genome duplication<sup>14,15</sup>), and (iv) genes containing out-paralogs (i.e., multiple copies in a given species not grouped into its respective monophyletic clade). The following clades were considered for paralogy detection: chondrichthyans, actinopterygians, coelacanth, lungfishes, caecilians, frogs, salamanders, turtles, crocodylians, birds, lepidosaurians, and mammals. Genes with out-paralogs were iteratively split into two sub-alignments according to the following procedure, implemented in the C program split-out-paralog.c: (i) the branch that maximizes the taxonomic diversity simultaneously in two subtrees (i.e., the sum of the number of species in each of the two partitions defined by the corresponding bipartition) is identified as putatively separating paralogous groups; if several branches fit this criterion, the longest one is selected; (ii) if and only if the identified branch separating two paralogous groups is sufficiently large (i.e., if the branch length is amongst the 10% longest branches of the tree), the alignment is split into two sub-alignments. The splitting procedure was repeated three times on the resulting alignments, which were discarded whenever the above taxonomic filter was not fulfilled or when the identified branch separating the putative paralogs was too short. Therefore, all alignments containing out-paralogs were either split or discarded. After out-paralog splitting, a total of 9,852 alignments remained.

These core alignments were complemented by mining genomic and transcriptomic data using the software Forty-Two (or “42”; <https://bitbucket.org/dbaurain/42/>), which was designed to enrich pre-existing alignments while controlling for orthology relationships. Briefly, “42” identifies orthologous sequences among homologous candidates in complete genomes or transcriptomes using multiple reference proteomes as controls in strict three-way reciprocal best BLAST hit tests.

To ensure the high quality of the alignments, several decontamination steps were carried out. A first step was based on sequence similarity searches. We used BLASTP<sup>16</sup> against a custom database containing both vertebrate (*Danio rerio*, *Gallus gallus* and *Homo sapiens*) and non-vertebrate (Supplementary Table 12) proteins to remove likely non-vertebrate contaminants. Sequences having a non-vertebrate best hit with an e-value at least 3 log<sub>10</sub> units lower than the e-value of the best vertebrate hit were considered putative contaminants and consequently removed. A further BLASTP search used specific databases for insects, nematodes and flatworms (Platyhelminthes) that were underrepresented in the previous database. Due to the smaller size of these databases, a difference of 1 log<sub>10</sub> unit in e-value was considered sufficient to remove putative contaminant sequences. A third BLAST search was used to specifically identify contamination by human sequences likely to occur during specimen collection or data generation steps. To increase the specificity of BLAST searches, we used the nucleotide rather than the amino acid sequences, and ran BLASTN searches against human CDS sequences (downloaded from Ensembl v.75). All sequences having an identity >98% with human were removed.

A second step consisted in eliminating cross-contaminations among newly generated libraries that were processed together during wet lab work. In order to do so, we searched for sequences that were clearly misplaced in gene trees (e.g., a sequence from a frog clustering within caecilians in gene trees) and extracted pairs of putative cross-contaminants. Specifically we tested cross-contamination between (i) *Tarentola* vs. *Polypterus*, (ii) *Neoceratodus* vs. *Lepidosiren* and (iii) and all pairwise combinations among *Andrias*, *Calotriton*, *Discoglossus*, *Geotrypetes*, *Megophrys*, *Proteus*, *Siren*, and *Typhlonectes*. Because contaminants are expected to occur at a lower concentration than the genuine gene, we estimated mRNA expression values and removed the sequence with the lowest FPKM in each pair. For the *Tarentola-Polypterus* pair, expression values were derived from SOAP assemblies, whereas in all other cases, FPKM values were estimated with RSEM<sup>17</sup> after read mapping with Bowtie v1.1.2<sup>18</sup>. This procedure removed 400 individual sequences.

In a third step, we extended the search for putative contaminants to all other downloaded data, using nuclear ribosomal and mitochondrial proteins as indicators because they are highly expressed and thus more prone to reveal contaminations. Nuclear ribosomal proteins present among our alignments were subjected to BLASTP searches against a reference database of metazoan ribosomal proteins. For mitochondrial sequences in our alignments, the corresponding nucleotide sequences were retrieved and subjected to BLASTN searches against a reference database that included available mitochondrial genomes and partial mitochondrial gene sequences for the species included in the study. This latter analysis was particularly efficient at pinpointing high similarities between unrelated species, given the overall faster evolutionary rate of mitochondrial proteins. Altogether, our analyses identified several instances of contamination, for which we performed additional decontamination steps as above. Finally, sequences from *Emys*, *Micrurus* and *Protopterus* were subjected to BLASTP searches against databases of available proteomes for birds, rat (*Rattus*) and squirrel monkey (*Saimiri*), respectively. In these cases, a slightly lower similarity threshold (95% identity) was used to identify contaminants. A total of 2,743 putative contaminating sequences were removed following these approaches. We assessed the effectiveness of all these decontamination steps by checking that the proportion of putatively contaminants was indeed reduced.

Limitations in assembly software based on De-Bruijn-graphs lead to the reconstruction of numerous highly similar transcripts (often of different length) and chimerical sequences in transcriptome assemblies, mainly due to differences between heterozygous alleles or sequencing errors. Since our dataset is in large part based on transcriptomic data, these problematic sequences were removed from our alignments by sequence similarity searches. For each species represented by at least two sequences in a given alignment, every sequence was

BLASTed against all the other sequences in the alignment, which allowed us to compute an average BLAST bit score for each potentially redundant sequence. A sequence was eliminated upon meeting the following two criteria: average bit score  $\geq 10\%$  lower than the best average bit score of the redundant set and a length overlap of  $\geq 95\%$  between the two sequences. This approach was implemented in the C program `detect-divergent-sequence.c` and resulted in the removal of 119,381 sequences.

In a further step, we used a second taxonomic filter to select alignments with a rich taxon sampling. Specifically, we filtered out all alignments that did not contain data for  $\geq 45$  species and at least 9 out of 10 major clades (chondrichthyans, actinopterygians, coelacanth, lungfishes, amphibians, turtles, crocodylians, birds, lepidosaurians, mammals). After this taxonomic filtering, a total of 7,687 alignments remained. To reduce stochastic error in the estimation of gene trees, we discarded both short sequences and alignments by (after ignoring columns with  $>25\%$  of missing data) requiring that all sequences have  $\geq 50$  amino acids and alignments contain  $\geq 100$  positions.

Even if paralogy had been addressed in the step where alignments contained 21 reference species (see above), new paralogy issues were expected to arise following the taxonomic enrichment of our alignments, either because paralogy only becomes apparent after the addition of further species or due to limitations of the heuristics of the software “42”. Since we were mainly concerned by the relationships among the 10 major vertebrate clades listed above, we considered two types of out-paralogy: (i) out-in-paralogs were defined as sequences of the same species that did not cluster in a monophyletic clade but still grouped within its taxonomic lineage (e.g., within ray-finned fishes), whereas (ii) out-out-paralogs (or deep paralogs) were defined when one of such sequences grouped outside of their corresponding clade. For each alignment, we computed the number of out-in-paralogs and of out-out-paralogs with the C program `detect-problem-arb.c` based on single-gene trees. Phylogenies were inferred using RAxML under the LG+ $\Gamma$  model, after discarding sequences containing  $< 50$  parsimony-informative positions to reduce stochastic error. 498 alignments containing  $\geq 3$  deep paralogs were discarded while the remaining genes were classified into 3 sets: no deep paralogs (4,593 genes), one (1,162) and two (1,434) deep paralogs.

To automatically remove sequencing errors (particularly those generating reading frame shifts) and annotation errors, which are frequent in high-throughput data<sup>19,20</sup>, we used the software HMMCleaner (R. Poujol, unpublished). Briefly, for each sequence of an alignment, a Hidden Markov Model (HMM) profile is computed for the alignment minus the sequence using HMMER (<http://hmmer.org>). Then, every region of that sequence having diverged more than a specific accumulative score from the HMM profile is discarded (we used the empirically estimated threshold of 10, which showed good performance for the sequence divergences in the range of those in our data; Amemiya, et al.<sup>21</sup>). Poorly aligned regions were removed with the software BMGE<sup>22</sup>, which uses entropy-like scores weighted by similarity matrices to identify poorly aligned positions and distinguish them from biologically expected variability. BMGE was run with stringent parameters ‘-h 0.5 -m BLOSSUM95’ and positions with  $>75\%$  of gaps or missing data were removed.

For each gene alignment, we used SCaFoS<sup>23</sup> to merge sequences belonging to the same species and to resolve putative remaining paralogy issues, creating alignments with up to 100 taxa each. In the presence of multiple partial sequences per species, SCaFoS collapses them into a single longer sequence, and if multiple complete sequences per species are present, the slowest-evolving sequence is selected. To maximize completeness of our dataset, we allowed the making of chimerical sequences in two cases, by merging data from closely related species of the same genus (*Rana chensinensis* + *Rana kukunoris* and *Chelonoidis carbonaria* + *Chelonoidis nigra*).

A fourth last decontamination step was performed to pinpoint problematic sequences by using branch lengths estimated from gene trees. This automatic procedure was designed to detect possible problems that might remain after all previous decontamination steps, removal of poorly aligned positions and sequence merging. The rationale for this analysis is that remaining erroneous sequences might become apparent through the generation of extremely long branches after enforcing the tree topology to a putative species phylogeny. First, a reference tree was estimated with RAxML under the LG+ $\Gamma$  model using a subset of genes corresponding to the taxonomically most complete alignments (containing >95 taxa; a total of 191,949 amino acid positions). For each gene, branch lengths were estimated with RAxML under the LG+ $\Gamma$  model after fixing the topology to the reference tree. Terminal branch lengths leading to individual taxa in each single-gene tree were then compared to those in the reference tree. Sequences showing an appreciably ( $\geq 5$  times) longer branch in a single gene tree than in the reference tree were eliminated from the corresponding alignment. A total of 4,891 sequences were removed following this procedure.

Finally, fully decontaminated alignments were concatenated again (as described above) and allowed us to generate three supermatrices: (i) the NoDP dataset for the 4,593 genes without deep paralogs (1,964,439 amino acid positions, 32% missing data), (ii) the 1DP dataset for the 1,162 genes with at most one putative deep paralog (668,132 amino acids; 36% missing data), and (iii) the 2DP dataset for the 1,434 genes with at most two putative deep paralogs (1,158,929 amino acids, 39% missing data). The three gene sets were analysed separately to assess the impact of paralogy on the estimated phylogenetic trees.

#### Phylogenetic performance of transcriptomes in relation to sequencing effort

We generated a total of 23 new transcriptomes, using between 6 and 514 million reads per species. Sequencing effort (measured as total sequenced bp) was correlated with transcriptome assembly measures (mean, median, N50), the proportion of recovered core vertebrate genes (CVG<sup>24</sup>), human orthologs and total number of amino acids in final alignments. The CVG protein set contains 233 reference orthologs and has been specifically designed to assess the completeness of vertebrate transcriptomes. The number of recovered CVG was estimated using the server gVolante (<https://gvolante.riken.jp/>) with the aid of BUSCO<sup>25</sup>. The total numbers of human proteins recovered at full (100%) and nearly-full (70%) length were estimated using the scripts of the Trinity pipeline<sup>2</sup> and BLASTX searches used DIAMOND<sup>26</sup>. As reference, we used the peptides predicted from the human genome (assembly GRCh38) downloaded from ENSEMBL. All 233 CVG genes and 99.3% (7136/7189) of human peptides were present in our dataset, demonstrating that the proportion of CVG and human peptides accurately quantify the completeness of transcriptomes and the number of genes readily usable for phylogenomics, respectively.

#### Assembly of the mitogenomic datasets

Available mitogenomes were downloaded from NCBI with a taxon sampling that essentially mirrors the above nuclear datasets. For species lacking mitogenomes, we replaced them if possible by those from closely related taxa. In addition, the partial mitogenome of *Tupinambis teguixin* was added because of its key phylogenetic position. To this end, mitochondrial proteins were identified through TBLASTN searches<sup>27</sup> against its transcriptome and added to the dataset. A few key taxa not present in the nuclear datasets were also included in the mitochondrial dataset to break long branches and thereby reduce long-branch attraction artefacts expected from fast-evolving and/or distantly related lineages (all taxa and NCBI accession numbers are available in Supplementary Table 11). The mitochondrial dataset was based on a curated alignment of animal mitogenomes (generously provided by Didier Casane, Université Paris Diderot) to which new species were added. All mitochondrial proteins were

concatenated except *nad6*, which was excluded to avoid potential problems generated by compositional heterogeneity (*nad6* is the only protein encoded on the minus strand<sup>7,28</sup>). A first mitochondrial dataset consisted of 106 species, from which only few particularly fast-evolving taxa were removed to generate a second mitochondrial dataset with 95 taxa aimed at reducing strong long-branch attraction artefacts detected in preliminary phylogenetic analyses. The MUST program package was used for sequence manipulation and visualization<sup>29</sup>. Highly variable and/or poorly aligned positions and positions with >50% gaps were eliminated with BMGE<sup>22</sup> using a stringent entropy cut-off ( $h=0.4$ ). The initial dataset had 106 taxa and 2,773 remaining amino acid positions (2,086 variable and 687 constant), while the second dataset consisted of 95 taxa and 2,866 amino acid positions (2,072 variable and 794 constant).

### Phylogenetic inference

The three nuclear gene sets NoDP, 1DP and 2DP were analysed separately. Maximum likelihood (ML) trees were reconstructed in RAxML v.8 under both LG+F+ $\Gamma$  and GTR+ $\Gamma$  amino acid models by analysing the complete concatenated matrices. Bayesian inference (BI) was performed using a gene jackknifing approach<sup>30</sup>, both for computational tractability and to estimate tree topologies and branch lengths that were robust to gene sampling. For each set of genes (NoDP, 1DP, 2DP), 100 replicates of ~50,000 amino acid positions were generated by randomly sampling single-gene alignments without replacement (~180 genes per replicate). We used PhyloBayes MPI v.1.5<sup>31</sup> to run a total of 300 MCMC chains under the CAT+ $\Gamma$  model for 10,000 cycles, saving every 10. For each set (NoDP, 1DP, 2DP), the corresponding 100 MCMC chains were summarized all at once by *bpcomp* after eliminating the first 10% data points as burnin. Convergence was verified using the diagnostic tools implemented in PhyloBayes. Branch support was assessed by the frequency of recovery across the 100 gene jackknife replicates in BI and across 1,000 pseudo-replicates of non-parametric bootstrapping in ML. To assess the robustness of our analyses to gene sampling, we generated jackknife replicates of increasing lengths and analysed them under ML. Specifically, we used the NoDP gene set from which 100 replicates were generated for five length classes (*ca.* 2,500, 5,000, 10,000, 25,000 and 50,000 aligned positions). A total of 500 independent analyses were performed with RAxML under the LG+ $\Gamma$  model, and for each of the four length classes, we calculated jackknife proportions of bipartitions and descriptive statistics on individual branch lengths. The three nuclear datasets were also analysed under a species tree approach consistent with the multispecies coalescent using ASTRAL-II v.4.10.12<sup>32</sup> with ML gene trees as input (estimated under best-fit models in RAxML). Node support of coalescent-based trees was assessed by local quartet-based branch support<sup>33</sup> and multi-locus bootstrapping<sup>34</sup> with 100 replicates.

The two mitochondrial datasets were each analysed by both ML (RAxML v.7.9.5<sup>35</sup>) and BI (PhyloBayes v.3.3<sup>36</sup>). ML analyses were performed with MTREV+ $\Gamma$  and GTR+ $\Gamma$  models, whereas BI analyses used the site-heterogeneous CAT+ $\Gamma$  and CAT-GTR+ $\Gamma$  models. In BI, two independent MCMC chains were run for 10,000 cycles, saving every 10 and convergence was verified using the diagnostic tools implemented in PhyloBayes.

To assess the fit of different models to both the nuclear and mitochondrial datasets, we performed 10-fold model cross-validations. For computational efficiency, model fit of the nuclear dataset was done using training datasets of 50,000 amino acid positions and test datasets of 10,000 amino acid positions. For both the nuclear test and mitochondrial datasets, we used PhyloBayes to perform cross-validation for the following models: LG+ $\Gamma$ , CAT+ $\Gamma$  and CAT-GTR+ $\Gamma$ . PhyloBayes was run after the removal of constant positions ('-dc' option) for 1100 cycles and removing the first 10% as burnin. The performed model cross-validations clearly favoured CAT-GTR+ $\Gamma$  > CAT+ $\Gamma$  > LG+ $\Gamma$  for both the nuclear and mitochondrial datasets (Supplementary Table 13). However, we used the CAT+ $\Gamma$  model to analyse the 300

gene jackknife replicates from the nuclear datasets (NoDP, 1DP, 2DP) as a compromise between good model fit and computational efficiency.

### Molecular dating

As a first step, we compared the performance of different evolutionary models (LG+ $\Gamma$ , CAT+ $\Gamma$ , CAT-GTR+ $\Gamma$ ) in the estimation of divergence times using a 10-fold cross-validation in the same manner as mentioned before, but with the additional assumptions of a birth-death prior on divergence times, a lognormal autocorrelated clock model, a fixed topology (Fig. 2a) and five well-accepted fossil calibrations plus a prior on the root (nodes 100, 102, 104, 105, 106, 107 in Supplementary Table 8). MCMC chains were run for 1,100 cycles and the initial 10% were removed as burnin. Model cross-validation favoured CAT-GTR+ $\Gamma$  as the best-fit model (Supplementary Table 13), and all dating analyses relied on this model. A second cross-validation was performed to assess the fit of different clock models (strict clock, autocorrelated lognormal and uncorrelated), with all other parameters set as in the previous cross-validations. Results were conclusive in rejecting a strict molecular clock and provided equal support for autocorrelated and uncorrelated models (5/10 replicates; Supplementary Table 13). In order to select the clock models that gave more realistic divergence estimates, we compared the obtained divergence times against the literature. To do so, we fetched all available estimates from the Timetree database ([www.timetree.org](http://www.timetree.org)) and for each node of interest we compared the means of divergence times against our estimated dates. Divergence times estimated by autocorrelated, uncorrelated and strict clock models showed average differences of respectively 35.69, 52.09 and 52.39 Myr against those of the literature, all comparisons being highly significant (paired t-test  $p < 0.05$  after square root or log transformation to conform with normality). Because the differences were appreciably smaller for the autocorrelated lognormal model, this model was assumed for further timetree analyses.

In addition to the previous six fossil calibrations, 24 additional well-established calibration points with solid paleontological evidence were selected from the literature and used conservative intervals to account for dating and phylogenetic uncertainty (Supplementary Table 8). On top of that, we assessed possible inconsistencies among calibrations by two cross-validation procedures. A first strategy relied on the method outlined in Near et al.<sup>37</sup>. Independent timetrees were estimated using each of the 29 single calibration points (plus the root calibration) and differences among prior (=mean of the prior interval) and estimated ages were compared as detailed in Near et al.<sup>37</sup>. None of the 29 calibrations were found to be inconsistent by appreciable differences in (i) the sum of squared differences between estimated molecular and fossil ages for all other fossil-calibrated nodes (SS) nor (ii) the variance of the  $s$  parameter (averaged SS after the successive removal of calibrations with highest SS), as assessed by one-tailed F-tests ( $p > 0.05$ ) (see Near et al.<sup>37</sup> for details). A second strategy (leave-one-out) aimed at comparing prior and posterior estimates after removal of one calibration at a time. Otherwise, individual chains were run as above. We compared prior and posterior dates among the 29 fossil-bearing nodes (root calibration was always used) by checking whether (i) prior and posterior confidence intervals overlapped and whether (ii) posterior mean was included within the prior interval. Given the relatively narrow posterior intervals estimated by PhyloBayes, we found 8 and 14 incongruent fossil calibrations, respectively for the above methods.

Based on the results of calibration cross-validations, we used three different calibration schemes in addition to the root calibration: (i) including all 29 calibrations, (ii) 21 and (iii) 15 calibrations. For each of the three calibration schemes, two MCMC chains were run in PhyloBayes until convergence, using the test dataset (14,352 amino acid positions) without constant positions and assuming the CAT-GTR+ $\Gamma$  and autocorrelated lognormal clock models, a birth-death prior and the fixed topology in Fig. 2a. In addition to these analyses, we run



individual MCMC chains on the 100 sub-alignments of ~15,000 amino acids generated from the NoDP dataset by gene jackknifing. These chains were run for >15,000 cycles using the most conservative set of calibrations (15 calibrations plus root) and all other settings as mentioned above. In all cases, the first 10% cycles were excluded as burnin and high effective sample sizes (>100) indicated that timetree analyses reached convergence.

#### Correlation of genome size and indels in protein-coding genes

We tested for the association between genome size with evolutionary rate<sup>38</sup> and species diversity<sup>39</sup>. Genome size data (haploid DNA content c-value) were retrieved from the Animal Genome Size Database ([www.genomesize.com](http://www.genomesize.com)). When several measurements existed for a given species, these were averaged; 18 species lacked information but genome size could be approximated by averaging existing data from other species in the same genus; 17 additional species lacked any genome size information and thus were excluded from this analysis. We calculated the number of gaps in both conserved and variable gene regions after filtering out species with >10% gaps in the regions to correct for misalignments (likely due to bad genome annotations). Conserved and variable gene regions were defined on untrimmed gene alignments using BMGE ('-h 0.5'), which would respectively retain and exclude these regions. The total number of gaps in both conserved and variable regions was calculated for each species. We used Pearson's correlation to study the relationship between genome size and number of gaps both in conserved and variable gene regions after correcting for phylogenetic relatedness using independent contrasts<sup>40</sup>. All calculations were performed in R<sup>41</sup> with the help of the ape package<sup>42</sup>.

As a complementary analysis, we used the Bayesian methods implemented in coevol v.1.4b<sup>43</sup> to study the correlation between parameters of the substitution process, genome size and the number of gaps in conserved and variable gene regions. For this analysis, we used a subset of the 41,360 most complete positions from the NoDP dataset (after removing positions with >5% gaps) and fixed topology and divergence times to those in Fig. 3. Two Kr/Kc amino acid models were used, either '-polvol' or '-charge', which model the rates of radical versus conservative amino acid replacements (analogous to dN/dS), considering as radical replacements those not conserving the polarity and/or volume ('-polvol') or charge ('-charge'). Two MCMC analyses were run for each of the models for 1,000 generations. All chains reached convergence, judged by the high effective sample sizes (>200). Results are available in Supplementary Table 7.

#### Correlation of nuclear substitution rates with genome size and species diversity

Nuclear substitution rates were calculated as root-to-tip paths from the BI tree of Fig. 2a, each divided by the total root age derived from the timetree (Fig. 3) to obtain absolute substitution rates. The correlation between nuclear substitution rates and genome size was performed on a total of 83 taxa (excluding those with no available genome size) using Pearson's correlation after correcting for phylogenetic non-independence. Data on current species diversity was obtained from web resources (Supplementary Table 6) and tabulated for a total of 44 lineages present in our tree, which were defined as lineages that split from their sister groups >150 Mya, an ad-hoc determined cut-off that allowed comparing lineages with obviously different diversity. Substitution rates either averaged for each clade or using the slowest rate per clade, were correlated with the species numbers using Pearson's correlation on phylogenetic independent contrasts.

We used a second approach to study the relationship between substitution rates and species diversity by comparing sister groups. For each of the mentioned 44 lineages, we identified the slowest-evolving species and performed relative-rate tests for all sister groups using the test dataset, as implemented in MEGA v.7<sup>44</sup>. For each sister group, we tabulated whether

evolutionary rates were significantly different ( $p < 0.05$ ) together with their corresponding species diversity, and assessed whether the observed differences were consistent using a Sign test.

### Comparison of nuclear and mitochondrial substitution rates

To visualize the among-lineage differences in the mitochondrial versus nuclear substitution rates, we estimated the nuclear and mitochondrial substitution rates per million year for each individual internal and terminal branch in the tree. This analysis was based on a subset of 78 species that were present in both the nuclear and mitochondrial datasets. We pruned the 22 species not present in the mitochondrial dataset from the BI tree from the NoDP dataset (Fig. 2a) using ape<sup>42</sup>. Species absent in the nuclear tree were removed from the mitochondrial dataset and branch lengths were estimated using the above reference pruned nuclear tree in PhyloBayes 3.3e under the CAT+ $\Gamma$  model. The resulting trees (Supplementary Fig. 18) were plotted in R using phytools<sup>45</sup>.

We further studied the relationship between nuclear and mitochondrial substitution rates by correlating the lengths of all individual internal and external branches in the nuclear and mitochondrial trees. For this analysis, nuclear branch lengths were first optimized using an alignment of approximately the same length as the mitochondrial dataset (2,866 positions) produced by gene jackknifing. Correlation between nuclear and mitochondrial branch lengths were assessed using Pearson's correlation. Using datasets of equal size excludes the effect of estimating branch lengths with different precisions. In addition, we discard the effect of gene sampling on the estimated nuclear branch lengths, as demonstrated by the very strong correlation with branch lengths estimated from 100 independent gene jackknife replicates of *ca.* 2,866 positions drawn from the NoDP dataset (average  $r = 0.94 \pm 0.02$ ). In order to fully understand the extent of mitochondrial to nuclear rate correlation obtained above, we calculated the correlation that can be expected from random datasets characterized by the amino acid frequencies of our nuclear and amino acid datasets. In order to do so, we used Seq-Gen<sup>46</sup> to simulate random gene alignments using the pruned nuclear reference tree and the LG+ $\Gamma$  model, and additionally assuming the amino acid frequencies of either the nuclear and mitochondrial datasets. A total of 100 "random nuclear" and 100 "random mitochondrial" alignments were generated, and estimated branch lengths were correlated using 100 correlation analyses for each pair of random datasets.

## Supplementary Tables and Figures

**Supplementary Table 1.** Statistics of sequencing effort, assembly and completeness of new transcriptomes. Sequencing effort: number of reads (Num.), read length (Length) and total sequenced base pairs (Total bp). Assembly statistics: mean and median of transcript lengths and N50. Number of amino acids in NoDP dataset (AANoDP; 4,593 genes) and for the total of all three nuclear datasets (AATot; 7,189 genes). Assembly completeness: number of recovered Core Vertebrate Genes (CVG). Number of recovered proteins: human genes recovered at full (100%) and nearly full (>70%) length coverage.

| Species                            | Raw clean reads (Millions) |        |           | Assembly statistics |        |       | Num. amino acids |           | CVG        | Human proteins |       |
|------------------------------------|----------------------------|--------|-----------|---------------------|--------|-------|------------------|-----------|------------|----------------|-------|
|                                    | Num.                       | Length | Total bp  | Mean                | Median | N50   | AANoDP           | AATot     | (%)        | 70%            | 100%  |
| <i>Megophrys nasuta</i>            | 6.10                       | 250    | 1,524.16  | 503                 | 325    | 616   | 1,018,306        | 1,856,209 | 196 (84%)  | 5,118          | 2,601 |
| <i>Calotriton asper</i>            | 6.63                       | 250    | 1,658.62  | 533                 | 347    | 685   | 1,000,947        | 1,686,050 | 189 (81%)  | 5,100          | 2,778 |
| <i>Typhlonectes natans</i>         | 8.22                       | 250    | 2,055.69  | 472                 | 319    | 540   | 678,646          | 1,101,327 | 143 (61%)  | 3,423          | 1,851 |
| <i>Geotrypetes seraphini</i>       | 8.10                       | 250    | 2,244.31  | 470                 | 318    | 543   | 948,260          | 1,645,775 | 177 (76%)  | 4,415          | 2,255 |
| <i>Proteus anguinus</i>            | 9.18                       | 250    | 2,294.97  | 493                 | 327    | 581   | 815,678          | 1,377,722 | 167 (72%)  | 3,968          | 2,088 |
| <i>Andrias davidianus</i>          | 11.46                      | 250    | 2,866.12  | 365                 | 258    | 355   | 1,434,893        | 2,506,140 | 137 (59%)  | 2,274          | 1,123 |
| <i>Pipa pipa</i>                   | 11.83                      | 250    | 2,956.80  | 479                 | 310    | 590   | 687,849          | 1,116,268 | 158 (68%)  | 3,562          | 1,898 |
| <i>Discoglossus pictus</i>         | 14.14                      | 250    | 3,534.38  | 473                 | 308    | 570   | 935,026          | 1,627,075 | 179 (77%)  | 4,387          | 2,175 |
| <i>Siren lacertina</i>             | 14.22                      | 250    | 3,554.94  | 459                 | 295    | 533   | 771,029          | 1,299,717 | 159 (68%)  | 3,560          | 1,800 |
| <i>Hymenochirus curticeps</i>      | 16.18                      | 250    | 4,045.05  | 544                 | 319    | 758   | 1,156,199        | 2,123,126 | 197 (85%)  | 6,131          | 3,241 |
| <i>Neoceratodus forsteri</i>       | 72.69                      | 100    | 7,268.54  | 762                 | 423    | 1,269 | 1,304,999        | 2,285,528 | 207 (89%)  | 10,847         | 6,134 |
| <i>Lepidosiren paradoxa</i>        | 102.10                     | 100    | 10,209.47 | 731                 | 491    | 1,539 | 1,673,662        | 3,141,799 | 221 (95%)  | 13,642         | 7,433 |
| <i>Scyliorhinus canicula</i>       | 258.90                     | 50     | 12,944.90 | 1142                | 487    | 2,445 | 1,600,775        | 3,040,809 | 220 (94%)  | 9,872          | 6,692 |
| <i>Protopterus annectens</i>       | 137.39                     | 100    | 13,739.38 | 670                 | 434    | 1,577 | 1,533,239        | 2,815,136 | 215 (92%)  | 13,186         | 7,587 |
| <i>Protopterus aethiopicus</i>     | 328.67                     | 50     | 16,433.39 | 1038                | 480    | 2,109 | 1,462,581        | 2,558,803 | 198 (85%)  | 8,238          | 5,681 |
| <i>Rhinatrema bivittatum</i>       | 332.50                     | 50     | 16,625.07 | 871                 | 437    | 1,638 | 1,600,673        | 2,833,244 | 215 (92%)  | 9,343          | 6,083 |
| <i>Polypterus senegalus</i>        | 355.43                     | 50     | 17,771.39 | 1198                | 481    | 2,669 | 1,644,586        | 3,128,920 | 223 (96%)  | 10,833         | 7,534 |
| <i>Lepisosteus patyrhincus</i>     | 359.89                     | 50     | 17,994.57 | 1784                | 835    | 3,767 | 1,681,766        | 3,209,672 | 233 (100%) | 11,860         | 7,263 |
| <i>Amia calva</i>                  | 368.68                     | 50     | 18,434.12 | 1342                | 638    | 2,708 | 1,543,408        | 2,859,757 | 221 (95%)  | 9,435          | 6,074 |
| <i>Pleurodeles waltl</i>           | 381.04                     | 50     | 19,051.82 | 1447                | 561    | 3,298 | 1,758,559        | 3,328,982 | 229 (98%)  | 11,610         | 8,467 |
| <i>Typhlonectes compressicauda</i> | 383.93                     | 50     | 19,196.26 | 843                 | 425    | 1,558 | 1,556,391        | 2,814,845 | 204 (88%)  | 8,862          | 6,020 |
| <i>Tarentola mauritanica</i>       | 392.79                     | 50     | 19,639.30 | 1333                | 554    | 2,944 | 1,787,455        | 3,378,576 | 227 (97%)  | 12,051         | 7,819 |
| <i>Raja clavata</i>                | 447.16                     | 50     | 22,357.93 | 859                 | 374    | 1,887 | 1,535,230        | 2,907,885 | 225 (97%)  | 10,020         | 6,779 |
| <i>Acipenser baerii</i>            | 514.43                     | 50     | 25,721.56 | 922                 | 525    | 1,575 | 1,696,440        | 3,252,781 | 223 (96%)  | 11,260         | 7,200 |

**Supplementary Table 2.** Pearson’s correlation statistics (r) among measures of sequencing effort (total number of reads, total sequenced base pairs, read length), statistics of assembled transcripts (mean, median, N50), the total number of amino acids in NoDP (AANoDP) and all three nuclear datasets (AATot), transcriptome completeness (Core Vertebrate Genes, CVG) and human proteins at 70% and 100% levels of coverage (cov). Significant correlations are highlighted in bold. The upper triangle shows correlations across all new transcriptomes, whereas the lower triangle shows correlations only among deeply-sequenced transcriptomes (>10,000 million total sequenced base pairs).

|                    | Total reads  | Total bp    | Read length  | Mean         | Median       | N50          | AANoDP       | AATot        | CVG          | 70% cov.     | 100% cov.    |
|--------------------|--------------|-------------|--------------|--------------|--------------|--------------|--------------|--------------|--------------|--------------|--------------|
| <b>Total reads</b> |              | <b>0.80</b> | <b>-0.91</b> | <b>0.98</b>  | <b>0.71</b>  | <b>0.81</b>  | <b>0.81</b>  | <b>0.82</b>  | <b>0.76</b>  | <b>0.71</b>  | <b>0.82</b>  |
| <b>Total bp</b>    | 0.35         |             | <b>-0.82</b> | <b>0.78</b>  | <b>0.94</b>  | <b>0.99</b>  | <b>0.75</b>  | <b>0.77</b>  | <b>0.78</b>  | <b>0.72</b>  | <b>0.80</b>  |
| <b>Read length</b> | <b>-0.85</b> | -0.54       |              | <b>-0.94</b> | <b>-0.77</b> | <b>-0.86</b> | <b>-0.89</b> | <b>-0.89</b> | <b>-0.85</b> | <b>-0.88</b> | <b>-0.94</b> |
| <b>Mean</b>        | <b>0.95</b>  | 0.19        | <b>-0.64</b> |              | <b>0.72</b>  | <b>0.80</b>  | <b>0.85</b>  | <b>0.86</b>  | <b>0.80</b>  | <b>0.79</b>  | <b>0.87</b>  |
| <b>Median</b>      | 0.13         | 0.86        | -0.21        | 0.07         |              | <b>0.91</b>  | <b>0.72</b>  | <b>0.73</b>  | <b>0.76</b>  | <b>0.75</b>  | <b>0.77</b>  |
| <b>N50</b>         | 0.24         | <b>0.97</b> | -0.43        | 0.09         | <b>0.79</b>  |              | <b>0.80</b>  | <b>0.82</b>  | <b>0.81</b>  | <b>0.78</b>  | <b>0.86</b>  |
| <b>AANoDP</b>      | 0.18         | 0.45        | -0.08        | 0.19         | 0.40         | 0.47         |              | <b>1.00</b>  | <b>0.82</b>  | <b>0.86</b>  | <b>0.89</b>  |
| <b>AATot</b>       | 0.21         | 0.47        | -0.07        | 0.23         | 0.43         | <b>0.50</b>  | <b>0.97</b>  |              | <b>0.82</b>  | <b>0.86</b>  | <b>0.89</b>  |
| <b>CVG</b>         | 0.19         | 0.55        | -0.07        | 0.21         | 0.53         | <b>0.60</b>  | <b>0.72</b>  | <b>0.83</b>  |              | <b>0.91</b>  | <b>0.92</b>  |
| <b>70% cov.</b>    | -0.47        | -0.01       | <b>0.70</b>  | -0.27        | 0.22         | 0.10         | <b>0.58</b>  | <b>0.62</b>  | <b>0.58</b>  |              | <b>0.98</b>  |
| <b>100% cov.</b>   | -0.10        | 0.26        | 0.29         | 0.02         | 0.21         | 0.39         | <b>0.77</b>  | <b>0.82</b>  | <b>0.71</b>  | <b>0.82</b>  |              |

**Supplementary Table 3.** Effect of alignment length on the recovery of the nodes in the reference phylogeny of Fig. 2a, measured as proportions from 100 gene jackknife replicates of increasing lengths: *ca.* 2,500, 5,000, 10,000, 25,000 and 50,000 amino acids (AA). Node IDs correspond to Supplementary Fig. 19.

| Node ID | 2500 AA | 5000 AA | 10,000 AA | 25,000 AA | 50,000 AA | Lineage                                                  |
|---------|---------|---------|-----------|-----------|-----------|----------------------------------------------------------|
| 101     | 100     | 100     | 100       | 100       | 100       | Ray-finned fishes (Actinopterygii)                       |
| 102     | 100     | 100     | 100       | 100       | 100       |                                                          |
| 103     | 75      | 99      | 100       | 100       | 100       | Sarcopterygians (Sarcopterygii)                          |
| 104     | 57      | 75      | 87        | 93        | 100       | Lungfish + tetrapod                                      |
| 105     | 87      | 100     | 100       | 100       | 100       | Tetrapods                                                |
| 106     | 96      | 100     | 100       | 100       | 100       | Amniotes                                                 |
| 107     | 94      | 100     | 100       | 100       | 100       | Archosaurs + turtles + Lepidosaurs (Diapsida)            |
| 108     | 87      | 99      | 100       | 100       | 100       | Archosaurians + turtles                                  |
| 109     | 97      | 100     | 100       | 100       | 100       | Archosaurians (Archosauria)                              |
| 110     | 100     | 100     | 100       | 100       | 100       | Crocodyles (Crocodylia)                                  |
| 111     | 88      | 96      | 99        | 100       | 100       |                                                          |
| 112     | 100     | 100     | 100       | 100       | 100       | Birds (Aves)                                             |
| 113     | 96      | 100     | 100       | 100       | 100       |                                                          |
| 114     | 95      | 100     | 100       | 100       | 100       |                                                          |
| 115     | 100     | 100     | 100       | 100       | 100       |                                                          |
| 116     | 100     | 100     | 100       | 100       | 100       |                                                          |
| 117     | 99      | 100     | 100       | 100       | 100       | Turtles (Testudines)                                     |
| 118     | 92      | 99      | 100       | 100       | 100       |                                                          |
| 119     | 96      | 100     | 100       | 100       | 100       |                                                          |
| 120     | 48      | 46      | 55        | 43        | 51        | Position of <i>Caretta</i> within turtles                |
| 121     | 78      | 95      | 100       | 100       | 100       |                                                          |
| 122     | 93      | 98      | 99        | 100       | 100       |                                                          |
| 123     | 91      | 99      | 100       | 100       | 100       |                                                          |
| 124     | 81      | 96      | 98        | 100       | 100       |                                                          |
| 125     | 73      | 91      | 96        | 100       | 100       | Lepidosaurians (Lepidosauria)                            |
| 126     | 97      | 100     | 100       | 100       | 100       | Squamates (Squamata)                                     |
| 127     | 68      | 94      | 99        | 100       | 100       | node within Lepidosauria                                 |
| 128     | 78      | 87      | 98        | 100       | 100       |                                                          |
| 129     | 38      | 49      | 65        | 95        | 100       | <i>Elgaria</i> + iguanian lizards + snakes               |
| 130     | 29      | 32      | 32        | 45        | 47        | <i>Elgaria</i> + iguanian lizards                        |
| 131     | 77      | 93      | 97        | 100       | 100       |                                                          |
| 132     | 99      | 99      | 100       | 100       | 100       |                                                          |
| 133     | 42      | 41      | 42        | 41        | 56        | <i>Anolis</i> + <i>Sceloporus</i>                        |
| 134     | 29      | 31      | 33        | 48        | 58        | <i>Iguana</i> + <i>Basiliscus</i>                        |
| 135     | 94      | 98      | 100       | 100       | 100       |                                                          |
| 136     | 100     | 100     | 100       | 100       | 100       | Snakes (Serpentes)                                       |
| 137     | 79      | 90      | 92        | 100       | 100       |                                                          |
| 138     | 100     | 100     | 100       | 100       | 100       |                                                          |
| 139     | 100     | 100     | 100       | 100       | 100       |                                                          |
| 140     | 100     | 100     | 100       | 100       | 100       |                                                          |
| 141     | 100     | 100     | 100       | 100       | 100       |                                                          |
| 142     | 100     | 100     | 100       | 100       | 100       |                                                          |
| 143     | 88      | 99      | 100       | 100       | 100       |                                                          |
| 144     | 99      | 100     | 100       | 100       | 100       |                                                          |
| 145     | 31      | 46      | 60        | 89        | 98        | <i>Podarcis</i> + <i>Tupinambis</i>                      |
| 146     | 100     | 100     | 100       | 100       | 100       |                                                          |
| 147     | 100     | 100     | 100       | 100       | 100       |                                                          |
| 148     | 55      | 78      | 87        | 97        | 98        | <i>Lampropholis</i> + <i>Saproscincus</i>                |
| 149     | 100     | 100     | 100       | 100       | 100       |                                                          |
| 150     | 98      | 100     | 100       | 100       | 100       | Mammals (Mammalia)                                       |
| 151     | 97      | 100     | 100       | 100       | 100       |                                                          |
| 152     | 99      | 100     | 100       | 100       | 100       |                                                          |
| 153     | 62      | 85      | 95        | 100       | 100       | Boreoeutheria                                            |
| 154     | 100     | 100     | 100       | 100       | 100       |                                                          |
| 155     | 70      | 83      | 97        | 100       | 100       | Human + mouse                                            |
| 156     | 33      | 34      | 36        | 30        | 75        | Armadillo + Elephant                                     |
| 157     | 100     | 100     | 100       | 100       | 100       |                                                          |
| 158     | 78      | 92      | 100       | 100       | 100       |                                                          |
| 159     | 89      | 100     | 100       | 100       | 100       | Lissamphibia                                             |
| 160     | 58      | 66      | 85        | 96        | 100       | Frogs + salamanders                                      |
| 161     | 89      | 100     | 100       | 100       | 100       | Salamanders (Caudata)                                    |
| 162     | 41      | 54      | 69        | 71        | 99        | Position of <i>Siren</i> within salamanders              |
| 163     | 77      | 98      | 100       | 100       | 100       |                                                          |
| 164     | 62      | 83      | 93        | 99        | 100       | Position of <i>Ambystoma</i> within salamanders          |
| 165     | 88      | 100     | 100       | 100       | 100       |                                                          |
| 166     | 78      | 98      | 100       | 100       | 100       |                                                          |
| 167     | 52      | 67      | 80        | 97        | 100       | <i>Notophthalmus</i> + <i>Calotriton</i> + <i>Cynops</i> |
| 168     | 90      | 94      | 98        | 100       | 100       |                                                          |
| 169     | 100     | 100     | 100       | 100       | 100       |                                                          |
| 170     | 100     | 100     | 100       | 100       | 100       | Frogs and toads (Anura)                                  |
| 171     | 62      | 69      | 89        | 98        | 100       | Position of pipoidean frogs                              |
| 172     | 56      | 57      | 80        | 95        | 95        | Pelobatoidean + neobatrachian frogs                      |
| 173     | 100     | 100     | 100       | 100       | 100       |                                                          |
| 174     | 100     | 100     | 100       | 100       | 100       |                                                          |
| 175     | 48      | 53      | 69        | 85        | 91        | <i>Atelopus</i> + <i>Espadarana</i>                      |
| 176     | 100     | 100     | 100       | 100       | 100       |                                                          |
| 177     | 79      | 90      | 94        | 96        | 97        |                                                          |
| 178     | 99      | 99      | 98        | 100       | 100       |                                                          |
| 179     | 54      | 65      | 67        | 82        | 98        | <i>Hymenochirus</i> + <i>Silurana</i>                    |
| 180     | 97      | 100     | 100       | 100       | 100       |                                                          |
| 181     | 100     | 100     | 100       | 100       | 100       | Caecilians (Gymnophiona)                                 |
| 182     | 100     | 100     | 100       | 100       | 100       |                                                          |
| 183     | 100     | 100     | 100       | 100       | 100       |                                                          |
| 184     | 100     | 100     | 100       | 100       | 100       |                                                          |
| 185     | 100     | 100     | 100       | 100       | 100       |                                                          |
| 186     | 100     | 100     | 100       | 100       | 100       |                                                          |
| 187     | 87      | 99      | 100       | 100       | 100       | Cartilaginous fishes (Chondrichthyes)                    |
| 188     | 78      | 96      | 100       | 100       | 100       |                                                          |
| 189     | 98      | 98      | 100       | 100       | 100       |                                                          |
| 190     | 93      | 97      | 98        | 98        | 100       |                                                          |
| 191     | 100     | 100     | 100       | 100       | 100       |                                                          |
| 192     | 68      | 88      | 96        | 100       | 100       | <i>Leucoraja</i> + <i>Neotrygon</i> + <i>Raja</i>        |
| 193     | 82      | 99      | 100       | 100       | 100       |                                                          |
| 194     | 70      | 75      | 88        | 99        | 100       | <i>Acipenser</i> within ray-finned fishes                |
| 195     | 100     | 100     | 100       | 100       | 100       |                                                          |
| 196     | 97      | 97      | 100       | 100       | 100       |                                                          |
| 197     | 100     | 100     | 100       | 100       | 100       |                                                          |
| 198     | 100     | 100     | 100       | 100       | 100       |                                                          |

**Supplementary Table 4.** Recovery of 40 selected nodes by 4,593 single genes from the NoDP dataset. For each node of interest, the proportion of genes supporting its monophyly is shown. For comparison, the jackknife proportions (GJP) for replicates of size 2,500 and 25,000 amino acids (AA) are shown (extracted from Supplementary Table 3). Node IDs correspond to Supplementary Fig. 19.

| Node ID | Monophyly % genes | GJP 2,500 AA | GJP 25,000 AA | Lineage                                                  |
|---------|-------------------|--------------|---------------|----------------------------------------------------------|
| 101     | 90.73             | 100          | 100           | Ray-finned fish (Actinopterygii)                         |
| 103     | 42.87             | 75           | 100           | Sarcopterygians (Sarcopterygii)                          |
| 104     | 31.98             | 57           | 93            | Lungfish + tetrapod                                      |
| 105     | 82.67             | 87           | 100           | Tetrapods                                                |
| 106     | 78.71             | 96           | 100           | Amniotes                                                 |
| 107     | 66.64             | 94           | 100           | Archosauroids + turtles + lepidosaurs (Diapsida)         |
| 108     | 43.20             | 87           | 100           | Archosauroids (Archosauria)                              |
| 110     | 92.81             | 100          | 100           | Crocodylians (Crocodylia)                                |
| 112     | 86.85             | 100          | 100           | Birds (Aves)                                             |
| 117     | 78.32             | 99           | 100           | Turtles (Testudines)                                     |
| 120     | 49.88             | 48           | –             | Position of <i>Caretta</i> within turtles                |
| 125     | 67.38             | 73           | 100           | Lepidosauroids (Lepidosauria)                            |
| 126     | 82.03             | 97           | 100           | Squamates (Squamata)                                     |
| 127     | 31.76             | 68           | 100           | node within lepidosauria                                 |
| 129     | 25.35             | 38           | 95            | <i>Elgaria</i> + iguanian lizards + snakes               |
| 130     | 16.77             | 29           | –             | <i>Elgaria</i> + iguanian lizards                        |
| 133     | 27.47             | 42           | –             | <i>Anolis</i> + <i>Sceloporus</i>                        |
| 134     | 22.76             | 29           | 48            | <i>Iguana</i> + <i>Basiliscus</i>                        |
| 136     | 89.15             | 100          | 100           | Snakes (Serpentes)                                       |
| 145     | 15.40             | 31           | 89            | <i>Podarcis</i> + <i>Tupinambis</i>                      |
| 148     | 42.60             | 55           | 97            | <i>Lampropholis</i> + <i>Saproscincus</i>                |
| 150     | 87.08             | 98           | 100           | Mammals (Mammalia)                                       |
| 153     | 29.37             | 62           | 100           | Boreoeutheria                                            |
| 155     | 31.72             | 70           | 100           | Human + mouse                                            |
| 156     | 21.90             | –            | –             | Armadillo + Elephant                                     |
| 159     | 57.51             | 89           | 100           | Lissamphibia                                             |
| 160     | 33.55             | 58           | 96            | Frogs + salamanders                                      |
| 161     | 91.43             | 89           | 100           | Salamanders (Caudata)                                    |
| 162     | 39.73             | 41           | 71            | Position of <i>Siren</i> within salamanders              |
| 164     | 47.96             | 62           | 99            | Position of <i>Ambystoma</i> within salamanders          |
| 167     | 64.35             | 78           | 100           | <i>Notophthalmus</i> + <i>Calotriton</i> + <i>Cynops</i> |
| 170     | 89.59             | 100          | 100           | Frogs and toads (Anura)                                  |
| 171     | 28.87             | 62           | 98            | Position of pipoidean frogs                              |
| 172     | 30.85             | 56           | 95            | Pelobatoidean + neobatrachian frogs                      |
| 175     | 42.46             | 48           | 85            | <i>Atelopus</i> + <i>Espadarana</i>                      |
| 179     | 47.22             | 54           | 82            | <i>Hymenochirus</i> + <i>Silurana</i>                    |
| 181     | 93.37             | 100          | 100           | Caecilians (Gymnophiona)                                 |
| 187     | 95.98             | 87           | 100           | Cartilaginous fishes (Chondrichthyes)                    |
| 192     | 85.03             | 98           | 100           | <i>Leucoraja</i> + <i>Neotrygon</i> + <i>Raja</i>        |
| 194     | 45.53             | 70           | 99            | <i>Acipenser</i> within ray-finned fish                  |

**Supplementary Table 5.** Results of topology tests performed on the nuclear test dataset. Table shows tested topologies and p-values of approximately unbiased (AU) and Shimodaira-Hasegawa (SH) tests. Significant p-values (<0.05) are highlighted in bold italics.

| <b>Phylogenetic hypotheses</b>                                                 | <b>AU (p)</b>       | <b>SH (p)</b>       |
|--------------------------------------------------------------------------------|---------------------|---------------------|
| Unconstrained BI tree from NoDP dataset                                        | 0.659               | 0.982               |
| BI tree from 1DP dataset                                                       | 0.639               | 0.981               |
| BI tree from 2DP dataset (= ML tree under GTR+ $\Gamma$ )                      | 0.093               | 0.394               |
| Paraphyly of Lissamphibia <sup>47</sup>                                        | <b><i>6e-07</i></b> | <b><i>0.002</i></b> |
| Caecilians + Salamanders are sister group (Procera hypothesis)                 | <b><i>0.001</i></b> | <b><i>0.031</i></b> |
| Turtles basal within amniotes                                                  | <b><i>9e-40</i></b> | <b><i>2e-04</i></b> |
| Turtles sister group to diapsids                                               | <b><i>8e-12</i></b> | <b><i>4e-04</i></b> |
| Turtles sister group to lepidosaurs                                            | <b><i>3e-33</i></b> | <b><i>6e-05</i></b> |
| Turtles sister group to crocodiles <sup>48</sup>                               | <b><i>8e-53</i></b> | <b><i>0</i></b>     |
| Coelacanth sister group to tetrapods                                           | <b><i>0.031</i></b> | 0.210               |
| Coelacanth + lungfishes basal within sarcopterygians                           | 0.052               | 0.273               |
| <i>Siren</i> basal in salamanders                                              | <b><i>0.008</i></b> | 0.122               |
| <i>Anolis</i> basal to <i>Iguana</i> , <i>Basiliscus</i> and <i>Sceloporus</i> | <b><i>0.001</i></b> | <b><i>0.033</i></b> |
| <i>Elgaria</i> sister group to snakes                                          | <b><i>0.016</i></b> | 0.148               |
| <i>Phrynops</i> basal to all other turtles <sup>49</sup>                       | <b><i>0.011</i></b> | 0.094               |
| ( <i>Silurana</i> , ( <i>Pipa</i> + <i>Hymenochirus</i> ))                     | <b><i>0.002</i></b> | <b><i>0.043</i></b> |
| <i>Sthernotherus</i> + <i>Caretta</i> basal in turtles                         | <b><i>0.001</i></b> | <b><i>0.026</i></b> |
| Elephant (Afrotheria) basal in placental mammals                               | <b><i>0.001</i></b> | 0.086               |
| Armadillo (Xenarthra) basal in mammals                                         | <b><i>0.022</i></b> | 0.138               |

**Supplementary Table 6.** Relationship between species diversity and substitution rates. Representative taxa for 44 clades of ages >150 Myr were used. Rate comparisons refer to comparisons of average branch lengths of sister clades (>, longer branches; <, shorter branches than sister group), and significance values refer to relative rate tests (NS, not significant; \* p<0.05; \*\* p<0.005; \*\*\* p<0.001). Sources for species numbers are abbreviated as follows: CoL: Catalogue, of Life, www.catalogueoflife.org; AW: Amphibiaweb, www.amphibiaweb.org; RD: Reptile Database, www.reptile-database.org; all accessed on 22 November 2015. NA shows cases where the species diversity could not be determined.

| Representative species             | Clade name                                           | Taxonomical correspondence                   | Evolutionary rate | Species Number | Rate difference | Diversity differences | Data source for diversity |
|------------------------------------|------------------------------------------------------|----------------------------------------------|-------------------|----------------|-----------------|-----------------------|---------------------------|
| <i>Acipenser baerii</i>            | Sturgeons                                            | Acipenseriformes                             | 0.5993            | 27             | < NS            | <                     | CoL                       |
| <i>Ambystoma mexicanum</i>         | Ambystomatid salamanders                             | Ambystomatidae + Dicamptodontidae            | 0.8502            | 36             | >*              | <                     | AW                        |
| <i>Amia calva</i>                  | Bowfin                                               | Amiiformes                                   | 0.6772            | 1              | < NS            | <                     | CoL                       |
| <i>Andrias davidianus</i>          | Giant salamanders                                    | Cryptobranchidae                             | 0.7855            | 3              | < NS            | <                     | AW                        |
| <i>Basiliscus plumifrons</i>       | Iguanas                                              | Iguanidae                                    | 0.6221            | 2450           | NA              | NA                    | RD                        |
| <i>Callorhynchus milii</i>         | Ratfishes, rabbitfishes, and elephantfishes          | Holocephali                                  | 0.3905            | 50             | < NS            | <                     | CoL                       |
| <i>Carcharodon carcharias</i>      | Mackerel sharks and allies                           | Lamniformes                                  | 0.3960            | 16             | < ***           | <                     | CoL                       |
| <i>Crocodylus niloticus</i>        | Crocodiles, alligators, and caimans                  | Crocodylia                                   | 0.5243            | 25             | < NS            | <                     | RD                        |
| <i>Cyclorana alboguttata</i>       | Neobatrachian frogs                                  | Neobatrachia                                 | 0.7157            | 6318           | NA              | NA                    | AW                        |
| <i>Danio rerio</i>                 | Teleost fishes                                       | Teleostei                                    | 0.9934            | 31826          | > ***           | >                     | CoL                       |
| <i>Discoglossus pictus</i>         | Fire-bellied toads, midwife toads, and painted frogs | Alytidae + Bombinatoridae                    | 0.9242            | 21             | < ***           | <                     | AW                        |
| <i>Elgaria multicarinata</i>       | Anguimorph lizards                                   | Anguimorpha                                  | 0.8953            | 225            | < NS            | <                     | RD                        |
| <i>Emys orbicularis</i>            | Hard-shelled cryptodiran turtles and tortoises       | Durocryptodira                               | 0.7806            | 217            | NA              | NA                    | RD                        |
| <i>Eublepharis macularius</i>      | Geckos                                               | Gekkota                                      | 0.6560            | 1650           | < NS            | <                     | RD                        |
| <i>Ginglymostoma cirratum</i>      | Carp sharks and allies                               | Orectolobiformes                             | 0.6837            | 44             | > **            | <                     | CoL                       |
| <i>Homo sapiens</i>                | Placental mammals                                    | Placentalia                                  | 0.6743            | 5485           | NA              | NA                    | CoL                       |
| <i>Hynobius chinensis</i>          | Hynobiid salamanders                                 | Hynobiidae                                   | 0.7911            | 64             | NA              | NA                    | AW                        |
| <i>Latimeria chalumnae</i>         | Coelacanths                                          | Coelacanthiformes                            | 0.5012            | 2              | < NS            | <                     | CoL                       |
| <i>Lepisosteus platyrhincus</i>    | Gars                                                 | Lepisosteiformes                             | 0.8647            | 7              | NA              | NA                    | CoL                       |
| <i>Megophrys nasuta</i>            | Spadefoot toads and allies                           | Megophryidae + Pelobatidae + Pelodytidae +   | 1.0450            | 205            | > ***           | <                     | AW                        |
| <i>Monodelphis domestica</i>       | Marsupial mammals                                    | Marsupialia                                  | 0.8727            | 335            | < ***           | <                     | CoL                       |
| <i>Neoceratodus forsteri</i>       | Australian lungfish                                  | Ceratodontiformes                            | 0.5486            | 1              | < ***           | <                     | CoL                       |
| <i>Neotrygon kuhlii</i>            | Stingrays and allies                                 | non-rajooid Batoidea                         | 0.4615            | 293            | > NS            | <                     | CoL                       |
| <i>Ornithorhynchus anatinus</i>    | egg-laying mammals                                   | Monotremata                                  | 0.8625            | 5              | < NS            | <                     | CoL                       |
| <i>Pelodiscus sinensis</i>         | Pignose and softshell turtles                        | Trionychia (Trionychidae + Carettochelyidae) | 0.7687            | 33             | < NS            | <                     | RD                        |
| <i>Pelusios castaneus</i>          | Pelomedusid and podocnemidid turtles                 | Podocnemididae + Pelomedusidae               | 0.7618            | 35             | > NS            | <                     | RD                        |
| <i>Phrynops hilarii</i>            | Austro-American sideneck turtles                     | Chelidae                                     | 0.7526            | 56             | NA              | NA                    | RD                        |
| <i>Podarcis</i> sp                 | Lacertid lizards and amphisbaenas                    | Lacertibaenia                                | 0.9038            | 515            | NA              | NA                    | RD                        |
| <i>Pogona vitticeps</i>            | Agamas and chameleons                                | Acrodonta                                    | 0.9496            | 661            | > ***           | <                     | RD                        |
| <i>Polypterus senegalus</i>        | Bichirs and ropefish                                 | Polypteriformes                              | 0.6984            | 14             | > NS            | <                     | CoL                       |
| <i>Proteus anguinus</i>            | Lungless and proteid salamanders, and allies         | Proteidae + Rhyacotritonidae + Amphiumidae + | 0.8585            | 461            | > NS            | >                     | AW                        |
| <i>Protopterus aethiopicus</i>     | African and South American lungfishes                | Lepidosireniformes                           | 0.8333            | 5              | NA              | NA                    | CoL                       |
| <i>Python regius</i>               | Snakes                                               | Serpentes                                    | 0.8397            | 3567           | > ***           | >                     | RD                        |
| <i>Raja clavata</i>                | Skates                                               | Rajoidei                                     | 0.6005            | 357            | NA              | NA                    | CoL                       |
| <i>Rhinatrema bivittatum</i>       | Rhinatreimid caecilians                              | Rhinatremitidae                              | 0.7417            | 11             | < ***           | <                     | AW                        |
| <i>Salamandra salamandra</i>       | Salamandrid salamanders                              | Salamandridae                                | 0.7425            | 112            | NA              | NA                    | AW                        |
| <i>Scincella lateralis</i>         | Skinks and allies                                    | Scinciformata                                | 0.7410            | 1736           | > NS            | <                     | RD                        |
| <i>Scyliorhinus canicula</i>       | Ground sharks                                        | Carcharhiniformes                            | 0.4224            | 284            | NA              | NA                    | CoL                       |
| <i>Siren lacertina</i>             | Sirens (salamanders)                                 | Sirenidae                                    | 0.8731            | 4              | > ***           | <                     | AW                        |
| <i>Sphenodon punctatus</i>         | Tuatara                                              | Rhynchocephalia                              | 0.7887            | 1              | < ***           | <                     | RD                        |
| <i>Struthio camelus</i>            | Birds                                                | Aves                                         | 0.7909            | 10306          | NA              | NA                    | CoL                       |
| <i>Tuinambis teguixin</i>          | Whiptails, tegus, and allies                         | Teiiformata                                  | 0.9389            | 399            | > ***           | <                     | RD                        |
| <i>Typhlonectes compressicauda</i> | Non-rhinatreimid caecilians                          | all caecilian families except                | 0.9075            | 194            | NA              | NA                    | AW                        |
| <i>Xenopus tropicalis</i>          | Clawed frogs and allies                              | Pipidae + Rhinophrynidae                     | 1.0034            | 34             | < NS            | <                     | AW                        |



**Supplementary Table 7.** Results from the Bayesian correlation analysis performed in coevol. Correlation among the following variables was studied: genome size (c-value), the number of gaps in conserved (gapscon) and variable (gapsvar) gene regions, the rate of conservative amino acid replacements (Kc) and the rate between radical and conservative amino acid replacements (Kr/Kc), estimated for two Kr/Kc models (“polvol” and “charge”; see Supplementary Materials and Methods for details). Correlation coefficients and the corresponding Bayesian posterior probabilities are shown in the lower and upper triangles, respectively (highlighted in bold when posterior probabilities >0.95).

| <b>Correlation coefficients \ Posterior probabilities</b> |           |              |                |                |                |
|-----------------------------------------------------------|-----------|--------------|----------------|----------------|----------------|
| <b>“polvol” model</b>                                     |           |              |                |                |                |
|                                                           | <b>Kc</b> | <b>Kr/Kc</b> | <b>c-value</b> | <b>gapsvar</b> | <b>gapscon</b> |
| <b>Kc</b>                                                 | –         | 0.84         | 0.80           | 0.22           | 0.42           |
| <b>Kr/Kc</b>                                              | 0.238     | –            | <b>0.98</b>    | 0.0055         | 0.0016         |
| <b>c-value</b>                                            | 0.141     | <b>0.338</b> | –              | 0.03           | 0.23           |
| <b>gapsvar</b>                                            | -0.133    | -0.58        | -0.244         | –              | <b>1</b>       |
| <b>gapscon</b>                                            | -0.0305   | -0.731       | -0.0911        | <b>0.361</b>   | –              |
| <b>“charge” model</b>                                     |           |              |                |                |                |
|                                                           | <b>Kc</b> | <b>Kr/Kc</b> | <b>c-value</b> | <b>gapsvar</b> | <b>gapscon</b> |
| <b>Kc</b>                                                 | –         | 0.84         | 0.73           | 0.28           | 0.44           |
| <b>Kr/Kc</b>                                              | 0.24      | –            | 0.78           | 0.02           | 0.18           |
| <b>c-value</b>                                            | 0.121     | 0.121        | –              | 0.041          | 0.28           |
| <b>gapsvar</b>                                            | -0.0939   | -0.586       | -0.23          | –              | <b>1</b>       |
| <b>gapscon</b>                                            | -0.0231   | -0.213       | -0.0704        | <b>0.353</b>   | –              |

**Supplementary Table 8.** Calibrations used in molecular dating analyses. Dates are in million years and node IDs correspond to Supplementary Fig. 19.

| Node ID | Speciation event                                       | Min. age | Max. age | Reference     | Calibration scheme |
|---------|--------------------------------------------------------|----------|----------|---------------|--------------------|
| 100     | Root (ray-finned vs. lobe-finned fishes)               | 421.75   | 462.5    | <sup>50</sup> | C30, C16           |
| 102     | Ray-finned vs. lobe-finned fishes                      | 416      | 439      | <sup>51</sup> | C30                |
| 104     | Lungfishes vs. tetrapods                               | 408      | 419      | <sup>52</sup> | C30, C16           |
| 105     | Amphibians vs. amniotes                                | 330.4    | 350.1    | <sup>53</sup> | C30, C16           |
| 106     | Diapsids vs. synapsids                                 | 288      | 338      | <sup>54</sup> | C30                |
| 107     | Lepidosaurians vs. archosaurians + turtles             | 252      | 257      | <sup>52</sup> | C30                |
| 109     | Crocodiles vs. birds                                   | 243      | 251      | <sup>55</sup> | C30                |
| 111     | <i>Alligator</i> vs. <i>Caiman</i>                     | 66       | 75       | <sup>55</sup> | C30                |
| 113     | Chicken vs. zebrafinch                                 | 66       | 86.5     | <sup>53</sup> | C30                |
| 117     | Cryptodiran vs. pleurodiran turtles                    | 210      | –        | <sup>56</sup> | C30, C16           |
| 124     | <i>Phrynos</i> vs. <i>Pelusios</i>                     | 25       | –        | <sup>56</sup> | C30, C16           |
| 125     | Tuatara ( <i>Sphenodon</i> ) vs. squamates             | 238      | –        | <sup>57</sup> | C30, C16           |
| 129     | Anguimorpha vs. snakes                                 | 148      | –        | <sup>57</sup> | C30, C16           |
| 131     | Pleurodont vs. acrodont iguanians                      | 165      | 230      | <sup>56</sup> | C30                |
| 132     | Crown group Iguanidae                                  | 125      | 180      | <sup>56</sup> | C30, C16           |
| 150     | Human vs. platypus (Theria-Monotremata)                | 162.5    | 191.4    | <sup>53</sup> | C30                |
| 151     | Human vs. opossum<br>(Placentalia-Marsupialia)         | 124.6    | 138.4    | <sup>53</sup> | C30                |
| 152     | Human vs. armadillo<br>(Boreoeutheria-Xenarthra)       | 95.3     | 113      | <sup>53</sup> | C30                |
| 154     | Dog vs. cat                                            | 42.8     | 63.8     | <sup>58</sup> | C30                |
| 155     | Human vs. mouse                                        | 61.5     | 100.5    | <sup>53</sup> | C30, C16           |
| 157     | Opossum vs. kangaroo<br>(Ameridelphia-Australidelphia) | 61.5     | 71.2     | <sup>53</sup> | C30                |
| 160     | Frogs vs. salamanders                                  | 249      | –        | <sup>59</sup> | C30, C16           |
| 169     | Hynobiidae vs. Cryptobranchidae                        | 145.5    | –        | <sup>60</sup> | C30, C16           |
| 170     | Discoglossoidea vs. other frogs                        | 161.2    | –        | <sup>61</sup> | C30, C16           |
| 171     | Pipoidea vs. other frogs                               | 145.5    | –        | <sup>62</sup> | C30, C16           |
| 178     | African vs. American pipids                            | 86       | –        | <sup>63</sup> | C30, C16           |
| 187     | Holocephalans vs. elasmobranchs                        | 410      | 495      | <sup>64</sup> | C30                |
| 188     | Sharks vs. batoids                                     | 190      | –        | <sup>64</sup> | C30, C16           |
| 192     | Rajidae vs. other batoids                              | 176      | –        | <sup>64</sup> | C30, C16           |
| 195     | Crown Neopterygii (Teleostei+ <i>Lepisosteus</i> )     | 345      | 392      | <sup>51</sup> | C30                |

**Supplementary Table 9.** Results of divergence time estimates, including genome-wide estimates calculated from 100 independent timetrees based on 100 gene jackknife replicates using calibration scheme C16, and timetrees based on the nuclear test data set using calibration schemes C16 and C30. Divergence times for the nuclear test data set are accompanied by 95% confidence intervals (CI) estimated by PhyloBayes, whereas the genome-wide estimates are accompanied by conservative credibility intervals (CrI) calculated as the absolute minimum and maximum values of 95% CI across the 100 gene jackknife timetrees. Node IDs correspond to Supplementary Fig. 19.

| Node ID | Genome-wide estimates<br>Calibration: C16 |        |        | Nuclear test data set<br>Calibration: C16 |        |        | Nuclear test data set<br>Calibration: C30 |        |        | Lineage                             |
|---------|-------------------------------------------|--------|--------|-------------------------------------------|--------|--------|-------------------------------------------|--------|--------|-------------------------------------|
|         | Mean                                      | minCrI | maxCrI | Mean                                      | minCI  | maxCI  | Mean                                      | minCI  | maxCI  |                                     |
| 100     | 457.55                                    | 438.96 | 465.40 | 458.21                                    | 446.44 | 464.65 | 460.01                                    | 451.57 | 465.31 |                                     |
| 101     | 321.64                                    | 227.75 | 375.77 | 325.10                                    | 281.23 | 356.79 | 392.61                                    | 382.59 | 402.91 | Ray-finned fish (Actinopterygii)    |
| 102     | 449.07                                    | 430.99 | 461.95 | 445.53                                    | 435.25 | 455.82 | 436.97                                    | 431.19 | 440.27 |                                     |
| 103     | 427.46                                    | 413.15 | 443.67 | 427.67                                    | 419.16 | 437.48 | 426.35                                    | 420.45 | 431.06 | Sarcopterygians (Sarcopterygii)     |
| 104     | 411.98                                    | 407.60 | 418.95 | 412.09                                    | 407.85 | 418.54 | 412.02                                    | 407.90 | 418.03 | Lungfish + tetrapod                 |
| 105     | 346.15                                    | 333.07 | 351.35 | 345.09                                    | 334.21 | 350.65 | 340.57                                    | 330.91 | 349.93 | Tetrapods                           |
| 106     | 316.64                                    | 299.00 | 330.15 | 312.13                                    | 297.40 | 323.65 | 288.56                                    | 282.58 | 295.83 | Amniotes                            |
| 107     | 294.43                                    | 272.95 | 313.03 | 291.13                                    | 274.97 | 305.51 | 256.77                                    | 255.70 | 257.44 | Diapsids                            |
| 108     | 281.71                                    | 256.53 | 304.75 | 283.67                                    | 267.03 | 298.94 | 254.38                                    | 252.53 | 255.96 |                                     |
| 109     | 259.38                                    | 225.99 | 288.36 | 253.08                                    | 231.01 | 273.49 | 243.21                                    | 242.16 | 244.71 | Archosaurs (Archosauria)            |
| 110     | 119.73                                    | 41.47  | 192.54 | 114.51                                    | 65.08  | 164.93 | 120.32                                    | 90.13  | 162.47 | Crocodyles (Crocodylia)             |
| 111     | 80.47                                     | 25.29  | 160.21 | 79.09                                     | 41.74  | 122.23 | 70.61                                     | 66.02  | 75.02  |                                     |
| 112     | 150.34                                    | 86.79  | 211.96 | 145.62                                    | 100.52 | 187.17 | 136.57                                    | 111.04 | 173.14 | Birds (Aves)                        |
| 113     | 116.74                                    | 57.90  | 187.75 | 107.45                                    | 67.19  | 150.01 | 83.03                                     | 70.24  | 87.49  | Neognathae                          |
| 114     | 93.51                                     | 42.73  | 164.71 | 83.90                                     | 49.49  | 123.43 | 63.00                                     | 47.20  | 72.81  |                                     |
| 115     | 25.87                                     | 8.77   | 66.09  | 20.44                                     | 9.61   | 36.96  | 15.96                                     | 8.09   | 25.30  |                                     |
| 116     | 108.93                                    | 50.53  | 179.38 | 107.39                                    | 65.22  | 150.93 | 92.13                                     | 65.83  | 130.11 | Palaeognathae                       |
| 117     | 227.36                                    | 189.06 | 265.68 | 223.30                                    | 197.95 | 250.15 | 224.33                                    | 211.24 | 234.25 | Turtles (Testudines)                |
| 118     | 202.41                                    | 158.85 | 242.79 | 200.32                                    | 168.90 | 230.99 | 206.17                                    | 184.05 | 221.45 | Cryptodira                          |
| 119     | 160.38                                    | 103.12 | 207.37 | 154.12                                    | 114.51 | 187.96 | 168.59                                    | 133.04 | 187.99 |                                     |
| 120     | 152.86                                    | 93.79  | 200.31 | 139.01                                    | 99.73  | 173.18 | 155.40                                    | 117.28 | 176.32 |                                     |
| 121     | 123.40                                    | 66.07  | 173.25 | 111.47                                    | 74.76  | 146.06 | 127.13                                    | 90.14  | 150.13 |                                     |
| 122     | 85.15                                     | 38.93  | 148.51 | 83.01                                     | 51.70  | 116.04 | 95.02                                     | 63.08  | 124.33 |                                     |
| 123     | 81.02                                     | 28.36  | 133.92 | 63.66                                     | 35.77  | 96.36  | 77.52                                     | 45.26  | 107.43 |                                     |
| 124     | 190.64                                    | 116.08 | 247.78 | 180.99                                    | 143.06 | 215.14 | 191.94                                    | 167.22 | 210.97 | Pleurodira                          |
| 125     | 270.76                                    | 246.16 | 298.09 | 267.21                                    | 249.60 | 283.69 | 239.06                                    | 233.30 | 244.30 | Lepidosaurians (Lepidosauria)       |
| 126     | 203.67                                    | 183.05 | 227.96 | 202.37                                    | 186.10 | 219.58 | 199.34                                    | 190.37 | 208.01 | Squamates (Squamata)                |
| 127     | 197.68                                    | 176.90 | 222.23 | 194.31                                    | 177.94 | 211.94 | 194.75                                    | 185.31 | 203.89 |                                     |
| 128     | 185.83                                    | 166.45 | 210.88 | 182.22                                    | 166.54 | 199.95 | 186.55                                    | 177.06 | 196.27 |                                     |
| 129     | 179.30                                    | 159.31 | 203.92 | 176.74                                    | 161.69 | 194.07 | 181.98                                    | 172.75 | 191.82 |                                     |
| 130     | 175.16                                    | 155.82 | 198.10 | 175.29                                    | 160.49 | 192.34 | 180.61                                    | 171.65 | 190.19 |                                     |
| 131     | 160.14                                    | 142.85 | 183.60 | 158.63                                    | 146.82 | 172.77 | 166.36                                    | 159.40 | 174.68 |                                     |
| 132     | 125.47                                    | 116.27 | 138.93 | 127.19                                    | 120.28 | 137.99 | 136.57                                    | 124.02 | 150.85 |                                     |
| 133     | 119.87                                    | 105.58 | 134.25 | 116.50                                    | 105.84 | 128.35 | 126.84                                    | 110.62 | 142.45 |                                     |
| 134     | 119.84                                    | 104.16 | 136.49 | 119.53                                    | 109.57 | 131.24 | 129.94                                    | 114.64 | 145.09 |                                     |
| 135     | 118.10                                    | 88.10  | 147.63 | 114.69                                    | 97.39  | 130.54 | 128.27                                    | 104.46 | 143.36 |                                     |
| 136     | 69.52                                     | 42.66  | 106.39 | 79.33                                     | 61.54  | 99.42  | 94.20                                     | 71.86  | 118.74 | Snakes (Serpentes)                  |
| 137     | 63.11                                     | 37.84  | 97.33  | 71.86                                     | 54.27  | 91.40  | 87.71                                     | 65.73  | 111.91 |                                     |
| 138     | 37.04                                     | 19.03  | 70.68  | 47.43                                     | 32.32  | 66.12  | 63.65                                     | 40.49  | 91.16  |                                     |
| 139     | 22.71                                     | 10.60  | 49.45  | 31.80                                     | 19.92  | 47.49  | 46.94                                     | 26.10  | 72.14  |                                     |
| 140     | 6.87                                      | 2.20   | 17.19  | 6.23                                      | 3.03   | 11.72  | 11.49                                     | 4.11   | 24.80  |                                     |
| 141     | 27.15                                     | 12.16  | 52.35  | 31.07                                     | 19.79  | 46.34  | 45.58                                     | 25.12  | 71.55  |                                     |
| 142     | 14.44                                     | 5.37   | 30.59  | 17.27                                     | 10.27  | 27.46  | 26.81                                     | 13.02  | 48.98  |                                     |
| 143     | 23.01                                     | 10.95  | 46.16  | 25.71                                     | 15.95  | 39.16  | 38.72                                     | 20.67  | 63.88  |                                     |
| 144     | 13.06                                     | 5.60   | 28.14  | 14.17                                     | 8.24   | 22.75  | 22.41                                     | 10.63  | 41.71  |                                     |
| 145     | 171.84                                    | 112.44 | 200.04 | 172.96                                    | 156.09 | 191.11 | 178.70                                    | 166.81 | 189.64 | <i>Podarcis</i> + <i>Tupinambis</i> |
| 146     | 141.52                                    | 99.87  | 175.16 | 137.01                                    | 113.25 | 162.49 | 155.74                                    | 135.45 | 171.62 |                                     |
| 147     | 44.81                                     | 19.07  | 77.06  | 42.41                                     | 26.58  | 61.46  | 57.09                                     | 34.23  | 77.41  |                                     |
| 148     | 37.32                                     | 14.79  | 69.78  | 31.71                                     | 18.87  | 48.19  | 44.38                                     | 23.96  | 64.79  |                                     |
| 149     | 162.18                                    | 124.66 | 196.21 | 144.30                                    | 116.81 | 170.59 | 164.79                                    | 145.89 | 180.58 |                                     |
| 150     | 254.73                                    | 202.83 | 290.83 | 242.00                                    | 212.52 | 268.23 | 164.59                                    | 160.61 | 172.00 | Mammals (Mammalia)                  |
| 151     | 214.48                                    | 168.94 | 257.13 | 214.87                                    | 187.19 | 241.41 | 138.26                                    | 136.01 | 140.17 | Theria                              |
| 152     | 101.53                                    | 73.30  | 138.52 | 95.18                                     | 77.07  | 124.44 | 94.15                                     | 90.56  | 96.45  | Placentals                          |
| 153     | 90.94                                     | 65.71  | 122.29 | 85.47                                     | 69.82  | 112.61 | 88.92                                     | 84.82  | 91.97  | Boreoeutheria                       |
| 154     | 53.81                                     | 32.66  | 82.10  | 55.08                                     | 40.24  | 77.75  | 61.08                                     | 52.77  | 64.90  |                                     |
| 155     | 79.12                                     | 60.22  | 101.56 | 72.95                                     | 60.60  | 97.40  | 78.51                                     | 71.13  | 84.44  |                                     |
| 156     | 98.15                                     | 68.60  | 136.47 | 90.46                                     | 72.20  | 119.51 | 90.97                                     | 87.13  | 93.67  |                                     |
| 157     | 121.14                                    | 65.74  | 182.28 | 129.84                                    | 96.01  | 165.45 | 68.42                                     | 62.34  | 71.54  |                                     |
| 158     | 99.90                                     | 52.36  | 157.98 | 102.48                                    | 70.09  | 135.49 | 50.41                                     | 38.14  | 60.15  |                                     |
| 159     | 325.15                                    | 306.58 | 338.38 | 320.90                                    | 306.19 | 331.57 | 315.07                                    | 300.21 | 328.40 | Amphibians (Lissamphibia)           |
| 160     | 314.85                                    | 293.07 | 332.10 | 312.75                                    | 296.62 | 325.18 | 307.38                                    | 289.51 | 322.72 | Frogs + salamanders                 |
| 161     | 209.05                                    | 170.07 | 254.86 | 199.82                                    | 175.49 | 226.75 | 202.00                                    | 173.49 | 237.49 | Salamanders (Caudata)               |
| 162     | 196.11                                    | 154.62 | 245.82 | 187.66                                    | 163.37 | 214.12 | 191.68                                    | 162.58 | 225.91 |                                     |
| 163     | 174.76                                    | 126.67 | 225.72 | 170.16                                    | 143.87 | 196.88 | 177.38                                    | 146.40 | 210.28 |                                     |
| 164     | 161.09                                    | 112.51 | 210.11 | 158.83                                    | 130.61 | 185.43 | 167.73                                    | 137.34 | 199.05 |                                     |
| 165     | 88.33                                     | 44.90  | 132.55 | 103.59                                    | 73.82  | 129.39 | 117.29                                    | 86.21  | 143.25 |                                     |
| 166     | 63.44                                     | 30.27  | 99.11  | 77.81                                     | 52.00  | 101.98 | 91.90                                     | 62.39  | 117.05 |                                     |
| 167     | 52.60                                     | 20.91  | 90.03  | 62.58                                     | 39.82  | 85.88  | 77.04                                     | 48.84  | 100.78 |                                     |
| 168     | 33.52                                     | 13.14  | 65.29  | 40.19                                     | 23.86  | 59.02  | 53.48                                     | 29.57  | 73.59  |                                     |
| 169     | 163.92                                    | 131.78 | 217.22 | 153.59                                    | 132.59 | 180.75 | 161.68                                    | 133.89 | 196.43 |                                     |
| 170     | 186.33                                    | 153.03 | 230.77 | 193.44                                    | 162.42 | 225.97 | 200.81                                    | 170.20 | 232.33 | Frogs and toads (Anura)             |
| 171     | 174.20                                    | 140.83 | 222.40 | 182.78                                    | 150.84 | 216.60 | 192.11                                    | 160.56 | 224.21 |                                     |
| 172     | 165.25                                    | 127.79 | 215.68 | 175.41                                    | 143.38 | 209.93 | 186.12                                    | 154.33 | 217.75 |                                     |
| 173     | 123.78                                    | 81.80  | 172.73 | 137.67                                    | 103.74 | 173.77 | 154.78                                    | 122.64 | 185.98 |                                     |
| 174     | 72.30                                     | 35.05  | 124.39 | 85.58                                     | 54.60  | 120.65 | 105.37                                    | 71.10  | 139.66 |                                     |
| 175     | 64.84                                     | 25.31  | 118.48 | 74.18                                     | 45.85  | 107.07 | 93.55                                     | 62.29  | 126.69 |                                     |
| 176     | 40.18                                     | 14.71  | 94.18  | 48.18                                     | 25.26  | 82.19  | 70.37                                     | 33.40  | 110.02 |                                     |
| 177     | 30.33                                     | 10.61  | 77.16  | 33.42                                     | 16.17  | 61.45  | 53.61                                     | 21.69  | 89.26  |                                     |
| 178     | 130.05                                    | 92.33  | 181.88 | 140.18                                    | 106.95 | 177.21 | 155.94                                    | 119.47 | 189.28 |                                     |
| 179     | 119.60                                    | 77.77  | 176.20 | 127.09                                    | 93.67  | 164.22 | 143.99                                    | 105.86 | 176.98 |                                     |
| 180     | 158.18                                    | 108.62 | 208.02 | 145.71                                    | 110.58 | 183.27 | 160.14                                    | 124.95 | 194.00 |                                     |
| 181     | 213.48                                    | 151.09 | 270.45 | 211.85                                    | 169.20 | 249.84 | 212.66                                    | 161.89 | 255.34 | Caecilians (Gymnophiona)            |
| 182     | 148.19                                    | 82.34  | 208.59 | 145.95                                    | 103.36 | 183.65 | 155.43                                    | 105.14 | 194.83 |                                     |
| 183     | 28.86                                     | 4.87   | 85.33  | 25.22                                     | 10.04  | 47.60  | 36.11                                     | 12.27  | 65.41  |                                     |
| 184     | 203.12                                    | 129.36 | 294.63 | 208.28                                    | 157.01 | 262.06 | 222.66                                    | 165.02 | 279.27 |                                     |
| 185     | 55.53                                     | 25.66  | 109.72 | 62.25                                     | 37.41  | 92.11  | 78.25                                     | 47.52  | 106.88 |                                     |
| 186     | 5.38                                      | 1.11   | 22.62  | 3.06                                      | 1.06   | 7.60   | 6.07                                      | 1.60   | 14.62  |                                     |
| 187     | 303.73                                    | 238.51 | 358.70 | 296.23                                    | 250.19 | 339.78 | 414.06                                    | 402.40 | 428.01 | Chondrichthyes                      |
| 188     | 228.07                                    | 182.03 | 275.62 | 226.72                                    | 193.86 | 258.22 | 292.57                                    | 256.23 | 331.61 |                                     |
| 189     | 177.93                                    | 104.56 | 238.91 | 174.93                                    | 141.81 | 208.66 | 201.69                                    | 139.64 | 269.47 |                                     |
| 190     | 150.79                                    | 82.04  | 204.52 | 135.66                                    | 100.21 | 172.45 | 156.27                                    | 91.97  | 222.91 |                                     |
| 191     | 83.88                                     | 31.51  | 154.53 | 81.48                                     | 49.22  | 120.04 | 97.58                                     | 49.99  | 167.80 |                                     |
| 192     | 174.14                                    | 122.03 | 225.45 | 172.14                                    | 143.75 | 201.45 | 206.52                                    | 171.91 | 262.34 |                                     |
| 193     | 47.92                                     | 14.51  | 114.67 | 52.46                                     | 30.86  | 77.20  | 75.92                                     | 42.49  | 110.03 |                                     |
| 194     | 301.37                                    | 194.51 | 362.15 | 301.58                                    | 251.28 | 336.83 | 379.79                                    | 369.91 | 390.05 |                                     |
| 195     | 206.58                                    | 122.39 | 284.95 | 228.13                                    | 177.53 | 272.79 | 345.36                                    | 338.11 | 352.48 |                                     |
| 196     | 187.84                                    | 110.79 | 269.14 | 204.59                                    | 155.20 | 252.23 | 330.04                                    | 318.57 | 339.78 |                                     |
| 197     | 10.16                                     | 1.05   | 46.88  | 11.35                                     | 2.07   | 34.13  | 55.44                                     | 18.36  | 91.19  |                                     |
| 198     | 117.15                                    | 59.74  | 191.42 | 139.42                                    | 93.27  | 187.40 | 276.64                                    | 244.27 | 297.36 |                                     |

**Supplementary Table 10.** Taxon sampling of the nuclear data sets, including the taxon ID in multiple sequence alignments and accession numbers for genome assemblies and raw RNA-seq data.

| Taxon ID    | Species                            | Data type | Accession                                                           |
|-------------|------------------------------------|-----------|---------------------------------------------------------------------|
| Acipenser_  | <i>Acipenser baeri</i>             | RNA-seq   | SAMN06146200                                                        |
| Alligator_  | <i>Alligator mississippiensis</i>  | RNA-seq   | SRX209114                                                           |
| Ambystoma_  | <i>Ambystoma mexicanum</i>         | RNA-seq   | SRX1149362                                                          |
| Amia_calva  | <i>Amia calva</i>                  | RNA-seq   | SAMN06146197                                                        |
| Anas_platy  | <i>Anas platyrhynchos</i>          | genome    | BGI_duck_1.0 (ENSEMBL v.73)                                         |
| Andrias_da  | <i>Andrias davidianus</i>          | RNA-seq   | SAMN06075442                                                        |
| Anolis_car  | <i>Anolis carolinensis</i>         | genome    | AnoCar2.0 (ENSEMBL v.73)                                            |
| Atelopus_z  | <i>Atelopus zeteki</i>             | RNA-seq   | SRX339600                                                           |
| Basiliscus  | <i>Basiliscus plumifrons</i>       | RNA-seq   | SRS777494                                                           |
| Boa_constr  | <i>Boa constrictor</i>             | RNA-seq   | SRS777493                                                           |
| Bombina_ma  | <i>Bombina maxima</i>              | RNA-seq   | SRX185157, SRX185159                                                |
| Caiman_cro  | <i>Caiman crocodilus</i>           | RNA-seq   | Figuet et al. 2015. Genome Biol Evol 7:240-250.                     |
| Callorhinc  | <i>Callorhynchus milii</i>         | genome    | PRJNA236996, PRJNA18361                                             |
| Calotriton  | <i>Calotriton asper</i>            | RNA-seq   | SAMN06075443                                                        |
| Canis_fami  | <i>Canis lupus familiaris</i>      | genome    | CanFam3.1 (ENSEMBL v.73)                                            |
| Carcharodo  | <i>Carcharodon carcharias</i>      | RNA-seq   | SRX228421                                                           |
| Caretta_ca  | <i>Caretta caretta</i>             | RNA-seq   | Figuet et al. 2015. Genome Biol Evol 7:240-250.                     |
| Carlia_rub  | <i>Carlia rubrigularis</i>         | RNA-seq   | SRX213353 to SRX213362                                              |
| Chamaeleo_  | <i>Chamaeleo chamaeleon</i>        | RNA-seq   | SRP018939                                                           |
| Chelonoidi  | <i>Chelonoidis carbonaria</i>      | RNA-seq   | SRX385216                                                           |
| Chelonoidi  | <i>Chelonoidis nigra</i>           | RNA-seq   | SRX565043-SRX565047; SRX385212-SRX385216                            |
| Chiloscyll  | <i>Chiloscyllium griseum</i>       | RNA-seq   | ERX348252, ERX348253                                                |
| Chinemys_r  | <i>Chinemys reevesii</i>           | RNA-seq   | SRX338126                                                           |
| Crocodylus  | <i>Crocodylus niloticus</i>        | RNA-seq   | SRS777495                                                           |
| Crotalus_a  | <i>Crotalus adamanteus</i>         | RNA-seq   | SRX127425                                                           |
| Cyclorana_  | <i>Cyclorana alboguttata</i>       | RNA-seq   | SRX205680; SRX205682-SRX205684;<br>SRX206002-SRX206005              |
| Cynops_pyr  | <i>Cynops pyrrhogaster</i>         | RNA-seq   | SRX391946                                                           |
| Danio_eri   | <i>Danio rerio</i>                 | genome    | Zv9 (ENSEMBL v.73)                                                  |
| Dasybus_no  | <i>Dasybus novemcinctus</i>        | genome    | dasNov2 (ENSEMBL v.73)                                              |
| Discogloss  | <i>Discoglossus pictus</i>         | RNA-seq   | SAMN06075438                                                        |
| Dromaius_n  | <i>Dromaius novaehollandiae</i>    | RNA-seq   | SRX012419; SRX252410-SRX252413;                                     |
| Echis_colo  | <i>Echis coloratus</i>             | RNA-seq   | ERX190966-ERX190967; ERX190976-ERX190977;<br>ERX190984; ERX190991   |
| Elgaria_mu  | <i>Elgaria multicarinata</i>       | RNA-seq   | SRX209116                                                           |
| Emys_orbic  | <i>Emys orbicularis</i>            | RNA-seq   | Figuet et al. 2015. Genome Biol Evol 7:240-250.                     |
| Espadarana  | <i>Espadarana prosoblepon</i>      | RNA-seq   | SRX648210                                                           |
| Eublephari  | <i>Eublepharis macularius</i>      | RNA-seq   | ERX190969; ERX190971; ERX190980;<br>ERX190981; ERX190987; ERX190990 |
| Felis_catu  | <i>Felis catus</i>                 | genome    | ENSEMBL v.73                                                        |
| Gallus_gal  | <i>Gallus gallus</i>               | genome    | Galgal4 (ENSEMBL v.73)                                              |
| Geotrypete  | <i>Geotrypetes seraphini</i>       | RNA-seq   | SAMN06075446                                                        |
| Ginglymost  | <i>Ginglymostoma cirratum</i>      | RNA-seq   | SRX219865, SRX219866                                                |
| Hynobius_c  | <i>Hynobius chinensis</i>          | RNA-seq   | SRX386518                                                           |
| Homo_sapie  | <i>Homo sapiens</i>                | genome    | GRCh37 (ENSEMBL v.73)                                               |
| Hymenochir  | <i>Hymenochirus curticeps</i>      | RNA-seq   | SAMN06075440                                                        |
| Iguana_igu  | <i>Iguana iguana</i>               | RNA-seq   | SRS777492                                                           |
| Lamprophol  | <i>Lampropholis coggeri</i>        | RNA-seq   | SRX213363-SRX213377                                                 |
| Latimeria_  | <i>Latimeria chalumnae</i>         | genome    | LatCha1 (ENSEMBL v.73)                                              |
| Lepidosire  | <i>Lepidosiren paradoxa</i>        | RNA-seq   | SRR3632079-SRR3632086                                               |
| Lepisost00  | <i>Lepisosteus oculatus</i>        | genome    | LepOcu1 (ENSEMBL v.73)                                              |
| Lepisosteus | <i>Lepisosteus platyrhincus</i>    | RNA-seq   | SAMN06234167                                                        |
| Leucoraja_  | <i>Leucoraja erinacea</i>          | RNA-seq   | SRX1092112-SRX1092134                                               |
| Loxodont_   | <i>Loxodonta africana</i>          | genome    | loxAfr3 (ENSEMBL v.73)                                              |
| Macropus_e  | <i>Macropus eugenii</i>            | genome    | Meug_1.0 (ENSEMBL v.73)                                             |
| Megophrys_  | <i>Megophrys nasuta</i>            | RNA-seq   | SAMN06075447                                                        |
| Meleagris_  | <i>Meleagris gallopavo</i>         | genome    | UMD2 (ENSEMBL v.73)                                                 |
| Micrurus_f  | <i>Micrurus fulvius</i>            | RNA-seq   | SRX209497                                                           |
| Monodelphi  | <i>Monodelphis domestica</i>       | genome    | BORAD05 (ENSEMBL v.73)                                              |
| Mus_muscul  | <i>Mus musculus</i>                | genome    | GRCm38 (ENSEMBL v.73)                                               |
| Neoceratod  | <i>Neoceratodus forsteri</i>       | RNA-seq   | SRR3632078                                                          |
| Neotrygon_  | <i>Neotrygon kuhlii</i>            | RNA-seq   | SRX481088                                                           |
| Notophthal  | <i>Notophthalmus viridescens</i>   | RNA-seq   | SRX221724-SRX221727;SRX221730-SRX221731                             |
| Opheodrys_  | <i>Opheodrys aestivus</i>          | RNA-seq   | ERX190968; ERX190970; ERX190978;<br>ERX190979; ERX190985; ERX190986 |
| Ophiophagu  | <i>Ophiophagus hannah</i>          | RNA-seq   | SRX365144                                                           |
| Ornithorhy  | <i>Ornithorhynchus anatinus</i>    | genome    | OANA5 (ENSEMBL v.73)                                                |
| Pantheroph  | <i>Pantherophis guttatus</i>       | RNA-seq   | ERX190963; ERX190972; ERX190973;<br>ERX190982; ERX190988            |
| Pelodiscus  | <i>Pelodiscus sinensis</i>         | RNA-seq   | DRX001538; DRX001541;<br>DRX001551; DRX001578                       |
| Pelophylax  | <i>Pelophylax lessonae</i>         | RNA-seq   | SRX472107                                                           |
| Pelophyl00  | <i>Pelophylax nigromaculatus</i>   | RNA-seq   | SRX532382                                                           |
| Pelusios_c  | <i>Pelusios castaneus</i>          | RNA-seq   | SRX209127                                                           |
| Phrynos_h   | <i>Phrynosoma hillebrandii</i>     | RNA-seq   | Figuet et al. 2015. Genome Biol Evol 7:240-250.                     |
| Pipa_pipa_  | <i>Pipa pipa</i>                   | RNA-seq   | SAMN06075441                                                        |
| Pleurodele  | <i>Pleurodeles waltil</i>          | RNA-seq   | SAMN06146195                                                        |
| Podarcis_s  | <i>Podarcis sp.</i>                | RNA-seq   | Figuet et al. 2015. Genome Biol Evol 7:240-250.                     |
| Pogona_vit  | <i>Pogona vitticeps</i>            | RNA-seq   | Tzika et al. 2011. EvoDevo 2:19                                     |
| Polypterus  | <i>Polypterus senegalus</i>        | RNA-seq   | SAMN06146198                                                        |
| Proteus_an  | <i>Proteus anguinus</i>            | RNA-seq   | SAMN06075444                                                        |
| Protopte00  | <i>Protopterus aethiopicus</i>     | RNA-seq   | SAMN06146196                                                        |
| Protopteru  | <i>Protopterus annectens</i>       | RNA-seq   | SRX152529-SRX152531                                                 |
| Python_reg  | <i>Python regius</i>               | RNA-seq   | ERX190964; ERX190965; ERX190974;<br>ERX190975; ERX190983; ERX190989 |
| Raja_clava  | <i>Raja clavata</i>                | RNA-seq   | SAMN06146201                                                        |
| Rana_chens  | <i>Rana chensinensis</i>           | RNA-seq   | SRX200798                                                           |
| Rana_chens  | <i>Rana kukunoris</i>              | RNA-seq   | SRX200800                                                           |
| Rhinatrema  | <i>Rhinatrema bivittatum</i>       | RNA-seq   | SAMN06146202                                                        |
| Salamandra  | <i>Salamandra salamandra</i>       | RNA-seq   | SRS777496                                                           |
| Saprosinc   | <i>Saprosincus basiliscus</i>      | RNA-seq   | SRS777494                                                           |
| Sarcophilu  | <i>Sarcophilus harrisii</i>        | genome    | DEVIL7.0 (ENSEMBL v.73)                                             |
| Sceloporus  | <i>Sceloporus undulatus</i>        | RNA-seq   | SRX209117                                                           |
| Scincella_  | <i>Scincella lateralis</i>         | RNA-seq   | SRX793983                                                           |
| Scyliorhin  | <i>Scyliorhinus canicula</i>       | RNA-seq   | SAMN06234165; SAMN06234166                                          |
| Siren_lace  | <i>Siren lacertina</i>             | RNA-seq   | SAMN06075439                                                        |
| Sistrurus_  | <i>Sistrurus miliarius</i>         | RNA-seq   | SRX1032424                                                          |
| Sphenodon_  | <i>Sphenodon punctatus</i>         | RNA-seq   | SRA051647                                                           |
| Sternother  | <i>Sternotherus odoratus</i>       | RNA-seq   | SRX209126                                                           |
| Struthio_c  | <i>Struthio camelus</i>            | RNA-seq   | SRX790604                                                           |
| Taeniopygi  | <i>Taeniopygia guttata</i>         | genome    | taeGut3.2.4 (ENSEMBL v.73)                                          |
| Takifugu_r  | <i>Takifugu rubripes</i>           | genome    | FUGU4 (ENSEMBL v.73)                                                |
| Tarentola_  | <i>Tarentola mauritanica</i>       | RNA-seq   | SAMN06146199                                                        |
| Thamnophis  | <i>Thamnophis elegans</i>          | RNA-seq   | SRA010134                                                           |
| Trachemys_  | <i>Trachemys scripta</i>           | RNA-seq   | SRX565329-SRX565330                                                 |
| Tupinambis  | <i>Tupinambis teguixin</i>         | RNA-seq   | SRS777490                                                           |
| Typhlone00  | <i>Typhlonectes compressicauda</i> | RNA-seq   | SAMN06146203                                                        |
| Typhlonect  | <i>Typhlonectes natans</i>         | RNA-seq   | SAMN06075445                                                        |
| Xenopus_tr  | <i>Silurana tropicalis</i>         | genome    | JGI_4.2 (ENSEMBL v.73)                                              |

**Supplementary Table 11.** Taxon sampling of the mitochondrial datasets, including the taxon ID in multiple sequence alignments and NCBI or RefSeq accession numbers.

| Taxon ID    | Species                           | Accession | Taxon ID    | Species                               | Accession |
|-------------|-----------------------------------|-----------|-------------|---------------------------------------|-----------|
| Abronia_gr  | <i>Abronia graminea</i>           | NC_005958 | Leucoraja_  | <i>Leucoraja erinacea</i>             | NC_016429 |
| Acipenser_  | <i>Acipenser baerii</i>           | NC_017603 | Loxodonta_  | <i>Loxodonta africana</i>             | NC_000934 |
| Alligator_  | <i>Alligator sinensis</i>         | NC_004448 | Macropus_r  | <i>Macropus robustus</i>              | NC_001794 |
| Ambystoma_  | <i>Ambystoma mexicanum</i>        | NC_005797 | Mauremys_m  | <i>Mauremys mutica</i>                | NC_009330 |
| Amia_calva  | <i>Amia calva</i>                 | NC_004742 | Meleagris_  | <i>Meleagris gallopavo</i>            | NC_010195 |
| Amphisbaen  | <i>Amphisbaena schmidti</i>       | NC_006284 | Micrurus_f  | <i>Micrurus fulvius</i>               | NC_013481 |
| Anas_platy  | <i>Anas platyrhynchos</i>         | NC_009684 | Monodelphi  | <i>Monodelphis domestica</i>          | NC_006299 |
| Andrias_da  | <i>Andrias davidianus</i>         | NC_004926 | Mus_muscul  | <i>Mus musculus musculus</i>          | NC_010339 |
| Anolis_car  | <i>Anolis carolinensis</i>        | NC_010972 | Neoceratod  | <i>Neoceratodus forsteri</i>          | AJ584642  |
| Ascaphus_t  | <i>Ascaphus truei</i>             | AJ871087  | Neotrygon_  | <i>Neotrygon kuhlii</i>               | NC_021767 |
| Atympanoph  | <i>Atympanophrys shapingensis</i> | NC_018785 | Nerodia_si  | <i>Nerodia sipedon</i>                | NC_015793 |
| Basiliscus  | <i>Basiliscus vittatus</i>        | NC_012829 | Notophthal  | <i>Notophthalmus viridescens</i>      | EU880323  |
| Boa_constr  | <i>Boa constrictor</i>            | NC_007398 | Ophiophagu  | <i>Ophiophagus hannah</i>             | NC_011394 |
| Bombina_ma  | <i>Bombina maxima</i>             | NC_011049 | Ornithorhy  | <i>Ornithorhynchus anatinus</i>       | NC_000891 |
| Bufo_japon  | <i>Bufo japonicus</i>             | NC_009886 | Pantheroph  | <i>Pantherophis slowinskii</i>        | NC_009769 |
| Caiman_cro  | <i>Caiman crocodilus</i>          | NC_002744 | Pelobates_  | <i>Pelobates cultripes</i>            | NC_008144 |
| Callorhinc  | <i>Callorhynchus milii</i>        | NC_014285 | Pelodiscus  | <i>Pelodiscus sinensis</i>            | NC_006132 |
| Calotriton  | <i>Calotriton asper</i>           | EU880307  | Pelodytes_  | <i>Pelodytes cf. punctatus</i>        | NC_020000 |
| Canis_lupu  | <i>Canis lupus familiaris</i>     | NC_002008 | Pelomedusa  | <i>Pelomedusa subrufa</i>             | NC_001947 |
| Carcharodo  | <i>Carcharodon carcharias</i>     | NC_022415 | Pelophylax  | <i>Pelophylax nigromaculatus</i>      | NC_002805 |
| Caretta_ca  | <i>Caretta caretta</i>            | NC_016923 | Phrynosop_h | <i>Phrynosoma hilarii</i>             | JN999705  |
| Causus_def  | <i>Causus defilippi</i>           | NC_013479 | Pipa_carva  | <i>Pipa carvalhoi</i>                 | NC_015617 |
| Chamaeleo_  | <i>Chamaeleo chamaeleon</i>       | NC_012427 | Plestiodon  | <i>Plestiodon elegans</i>             | NC_024576 |
| Chiloscyll  | <i>Chiloscyllium griseum</i>      | NC_017882 | Pleurodele  | <i>Pleurodeles poireti</i>            | EU880329  |
| Chinemys_r  | <i>Chinemys reevesi</i>           | NC_006082 | Podocnemis  | <i>Podocnemis unifilis</i>            | NC_018865 |
| Chrysemys_  | <i>Chrysemys picta bellii</i>     | NC_023890 | Pogona_vit  | <i>Pogona vitticeps</i>               | NC_006922 |
| Coleonyx_v  | <i>Coleonyx variegatus</i>        | NC_008774 | Polypterus  | <i>Polypterus senegalus senegalus</i> | NC_004418 |
| Crocodylus  | <i>Crocodylus niloticus</i>       | NC_008142 | Proteus_an  | <i>Proteus anguinus</i>               | NC_023342 |
| Crotalus_h  | <i>Crotalus horridus</i>          | NC_014400 | Protopte00  | <i>Protopterus aethiopicus</i>        | NC_014764 |
| Cynops_pyr  | <i>Cynops pyrrhogaster</i>        | EU880313  | Protopteru  | <i>Protopterus annectens</i>          | NC_018822 |
| Danio_eri   | <i>Danio rerio</i>                | NC_002333 | Psammobate  | <i>Psammobates pardalis</i>           | NC_007694 |
| Dasypus_no  | <i>Dasypus novemcinctus</i>       | NC_001821 | Python_reg  | <i>Python regius</i>                  | NC_007399 |
| Discogloss  | <i>Discoglossus galganoi</i>      | NC_006690 | Rana_cf_c   | <i>Rana cf. Chensinensis</i>          | NC_023529 |
| Dromaius_n  | <i>Dromaius novaehollandiae</i>   | NC_002784 | Rhinatrema  | <i>Rhinatrema bivittatum</i>          | NC_006303 |
| Euprepioph  | <i>Euprepiophis perlacea</i>      | NC_024546 | Rhincodon_  | <i>Rhincodon typus</i>                | NC_023455 |
| Felis_catu  | <i>Felis catus</i>                | NC_001700 | Rhinophryn  | <i>Rhinophrynus dorsalis</i>          | NC_021849 |
| Gallus_gal  | <i>Gallus gallus</i>              | NC_001323 | Salamandra  | <i>Salamandra salamandra</i>          | EU880331  |
| Geotrypete  | <i>Geotrypetes seraphini</i>      | GQ244469  | Sarcophilu  | <i>Sarcophilus harrisii</i>           | NC_018788 |
| Heleophryn  | <i>Heleophryne regis</i>          | NC_019998 | Sceloporus  | <i>Sceloporus occidentalis</i>        | NC_005960 |
| Hemithecon  | <i>Hemitheconyx caudicinctus</i>  | NC_018368 | Scyliorhin  | <i>Scyliorhinus canicula</i>          | NC_001950 |
| Homo_sapie  | <i>Homo sapiens</i>               | AF346972  | Silurana_t  | <i>Silurana tropicalis</i>            | NC_006839 |
| Hyla_japon  | <i>Hyla japonica</i>              | NC_010232 | Siren_inte  | <i>Siren intermedia</i>               | GQ368661  |
| Hymenochir  | <i>Hymenochirus boettgeri</i>     | NC_015615 | Sooglossus  | <i>Sooglossus thomasseti</i>          | NC_020001 |
| Hynobius_c  | <i>Hynobius chinensis</i>         | NC_008088 | Sphenodon_  | <i>Sphenodon punctatus</i>            | NC_004815 |
| Ichthyaetu  | <i>Ichthyaetus relictus</i>       | NC_023777 | Sternother  | <i>Sternotherus carinatus</i>         | NC_017607 |
| Ichthyophi  | <i>Ichthyophis bombayensis</i>    | NC_023511 | Struthio_c  | <i>Struthio camelus</i>               | NC_002785 |
| Iguana_igu  | <i>Iguana iguana</i>              | NC_002793 | Taeniopygi  | <i>Taeniopygia guttata</i>            | NC_007897 |
| Latimeria_  | <i>Latimeria chalumnae</i>        | AB257297  | Takifugu_r  | <i>Takifugu rubripes</i>              | NC_004299 |
| Leiopelma_  | <i>Leiopelma archeyi</i>          | NC_014691 | Tarentola_  | <i>Tarentola mauritanica</i>          | NC_012366 |
| Lepidosire  | <i>Lepidosiren paradoxa</i>       | NC_003342 | Trachemys_  | <i>Trachemys scripta</i>              | NC_011573 |
| Lepisost00  | <i>Lepisosteus oculatus</i>       | NC_004744 | Tupinambis  | <i>Tupinambis teguixin</i>            | SRS777490 |
| Lepisosteus | <i>Lepisosteus osseus</i>         | NC_008104 | Typhlonect  | <i>Typhlonectes natans</i>            | NC_002471 |
| Leptobrach  | <i>Leptobranchium boringii</i>    | NC_024427 | Varanus_ni  | <i>Varanus niloticus</i>              | NC_008778 |

**Supplementary Table 12.** Non-vertebrate species used in the BLASTP decontamination step.

---

|                                              |                                           |
|----------------------------------------------|-------------------------------------------|
| <i>Acanthamoeba castellanii</i>              | <i>Leishmania major</i>                   |
| <i>Acromyrmex echinator</i>                  | <i>Leptospira borgpetersenii</i> JB197    |
| <i>Amphimedon queenslandica</i>              | <i>Loa loa</i>                            |
| <i>Anabaena cylindrica</i> PCC7122           | <i>Lottia gigantea</i>                    |
| <i>Apis mellifera</i>                        | <i>Magnaporthe oryzae</i>                 |
| <i>Aplysia californica</i>                   | <i>Micromonas</i> RCC299                  |
| <i>Arabidopsis thaliana</i>                  | <i>Monosiga brevicollis</i> ATCC50154     |
| <i>Aspergillus fumigatus</i>                 | <i>Nannochloropsis gaditana</i> CCMP526   |
| <i>Aureococcus anophagefferens</i>           | <i>Nematostella vectensis</i>             |
| <i>Bacillus subtilis</i>                     | <i>Opisthorchis viverrini</i>             |
| <i>Bacteroides coprocola</i>                 | <i>Oryza sativa</i>                       |
| <i>Batrachomyxium dendrobatidis</i>          | <i>Oxytricha trifallax</i>                |
| <i>Bigelowiella natans</i>                   | <i>Paramecium tetraurelia</i>             |
| <i>Bombyx mori</i>                           | <i>Pediculus humanus corporis</i>         |
| <i>Branchiostoma floridae</i>                | <i>Perkinsus marinus</i>                  |
| <i>Caenorhabditis elegans</i>                | <i>Physcomitrella patens</i>              |
| <i>Campylobacter concisus</i> 13826          | <i>Phytophthora infestans</i>             |
| <i>Candidatus nitrosopumilus</i>             | <i>Plancitomyces brasiliensis</i>         |
| <i>Candidatus Protochlamydia amoebophila</i> | <i>Populus trichocarpa</i>                |
| <i>Capitella teleta</i>                      | <i>Prochlorococcus marinus</i> NATL1A     |
| <i>Capsaspora owczarzaki</i>                 | <i>Pyrococcus abyssi</i>                  |
| <i>Chlamydomonas reinhardtii</i>             | <i>Reticulomyxa filosa</i>                |
| <i>Chlorella variabilis</i>                  | <i>Rhizophagus irregularis</i> DAOM181602 |
| <i>Chlorobium phaeobacteroides</i> DSM266    | <i>Rhizopus delemar</i>                   |
| <i>Chloroflexus aggregans</i> DSM9485        | <i>Rubritalea marina</i>                  |
| <i>Chondrus crispus</i>                      | <i>Rubrobacter radiotolerans</i>          |
| <i>Ciona intestinalis</i>                    | <i>Saccoglossus kowalevskii</i>           |
| <i>Clostridium akagii</i>                    | <i>Schistosoma japonicum</i>              |
| <i>Crassostrea gigas</i>                     | <i>Sinorhizobium meliloti</i>             |
| <i>Cryptococcus neoformans</i>               | <i>Streptomyces avermitilis</i> MA4680    |
| <i>Daphnia pulex</i>                         | <i>Strongylocentrotus purpuratus</i>      |
| <i>Desulfovibrio bastinii</i>                | <i>Sulfolobus solfataricus</i>            |
| <i>Dictyostelium discoideum</i>              | <i>Symbiodinium</i> spp                   |
| <i>Drosophila melanogaster</i>               | <i>Tetrahymena thermophila</i>            |
| <i>Emiliana huxleyi</i>                      | <i>Tetraselmis astigmatica</i>            |
| <i>Escherichia coli</i>                      | <i>Thalassiosira pseudonana</i>           |
| <i>Fonticula alba</i>                        | <i>Toxoplasma gondii</i>                  |
| <i>Fusarium graminearum</i>                  | <i>Tribolium castaneum</i>                |
| <i>Fusobacterium ulcerans</i> ATCC49185      | <i>Trichinella spiralis</i>               |
| <i>Glycine max</i>                           | <i>Trichoplax adhaerens</i>               |
| <i>Guillardia theta</i>                      | <i>Trypanosoma cruzi</i>                  |
| <i>Helobdella robusta</i>                    | <i>Vitrella brassicaformis</i>            |
| <i>Hydra vulgaris</i>                        | <i>Yarrowia lipolytica</i>                |
| <i>Ixodes scapularis</i>                     | <i>Zea mays</i>                           |

---

**Supplementary Table 13.** Results from model cross-validations performed in PhyloBayes.

| <b>Models compared</b>                                                                                         | <b>Mean score</b> | <b>Standard deviation</b> | <b># times model is best</b> |
|----------------------------------------------------------------------------------------------------------------|-------------------|---------------------------|------------------------------|
| <b>Amino acid substitution models</b>                                                                          |                   |                           |                              |
| <b>50,000 amino acid-long training datasets and 10,000 amino acid-long test datasets (phylogeny inference)</b> |                   |                           |                              |
| CATGTR vs. LG                                                                                                  | 11636.5           | 220.54                    | 10                           |
| GTR vs. LG                                                                                                     | 5195              | 107.232                   | 0                            |
| CAT vs. LG                                                                                                     | 5984.6            | 277.919                   | 0                            |
| <b>Amino acid substitution models</b>                                                                          |                   |                           |                              |
| <b>Nuclear test dataset (timetree inference)</b>                                                               |                   |                           |                              |
| CATGTR vs. CAT                                                                                                 | 500.68            | 112.514                   | 10                           |
| CATGTR vs. JTT                                                                                                 | 1214.68           | 120.44                    | 10                           |
| CAT vs. JTT                                                                                                    | 714               | 567.101                   | 10                           |
| <b>Molecular clock models</b>                                                                                  |                   |                           |                              |
| <b>Nuclear test dataset (timetree inference)</b>                                                               |                   |                           |                              |
| LN vs. CL                                                                                                      | 147.63            | 161.837                   | 10                           |
| UGAM vs. CL                                                                                                    | 148.55            | 20.445                    | 10                           |
| UGAM vs. LN                                                                                                    | 0.92              | 152.467                   | 5                            |
| <b>Amino acid substitution models</b>                                                                          |                   |                           |                              |
| <b>Mitochondrial dataset 106 species (phylogeny inference)</b>                                                 |                   |                           |                              |
| CATGTR vs. CAT                                                                                                 | 318.29            | 428.483                   | 10                           |
| CATGTR vs. MTREV                                                                                               | 582.98            | 45.316                    | 10                           |
| CAT vs. MTREV                                                                                                  | 264.69            | 47.613                    | 10                           |
| GTR vs. MTREV                                                                                                  | 149.86            | 31.798                    | 10                           |
| MTREV vs. LG                                                                                                   | 90.02             | 33.657                    | 10                           |

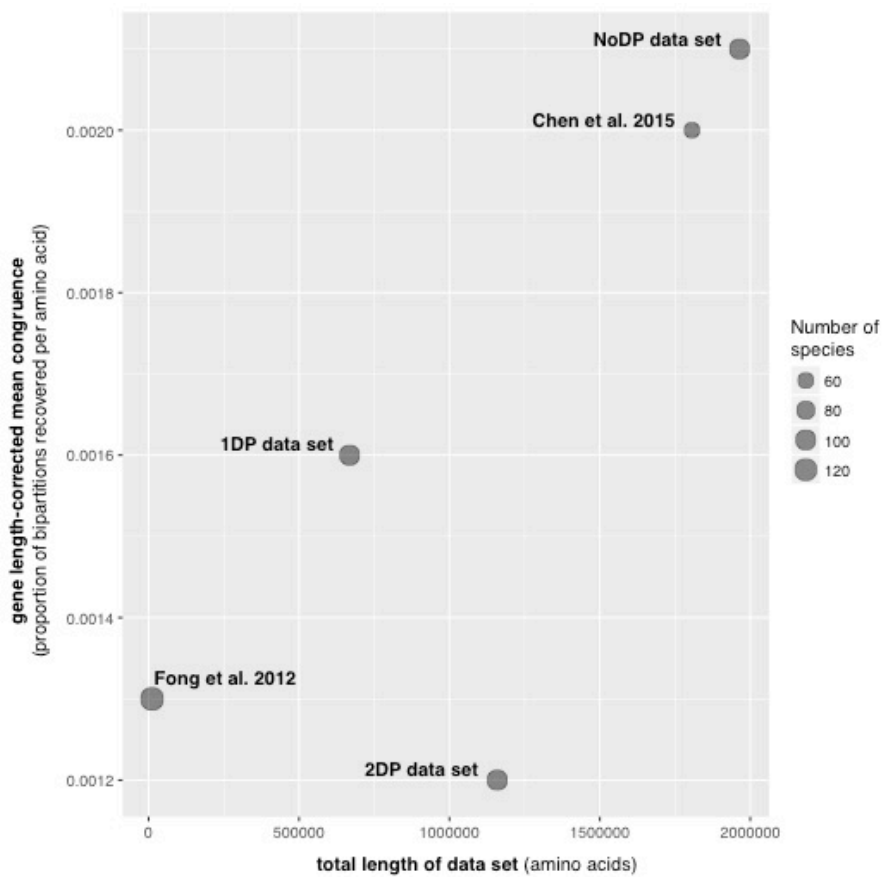

**Supplementary Figure 1.** Comparison of phylogenomic datasets by quality and size. Data quality is measured as mean congruence (proportion of final-tree bipartitions recovered by each gene, and corrected by gene length); dataset size is measured as total amino acid positions and the number of species included (represented by circle size). The graph compares the quality of our three datasets (NoDP, 1DP and 2DP) and the phylogenomic datasets of Fong et al.<sup>47</sup> and the most recent study by Chen et al.<sup>65</sup>.



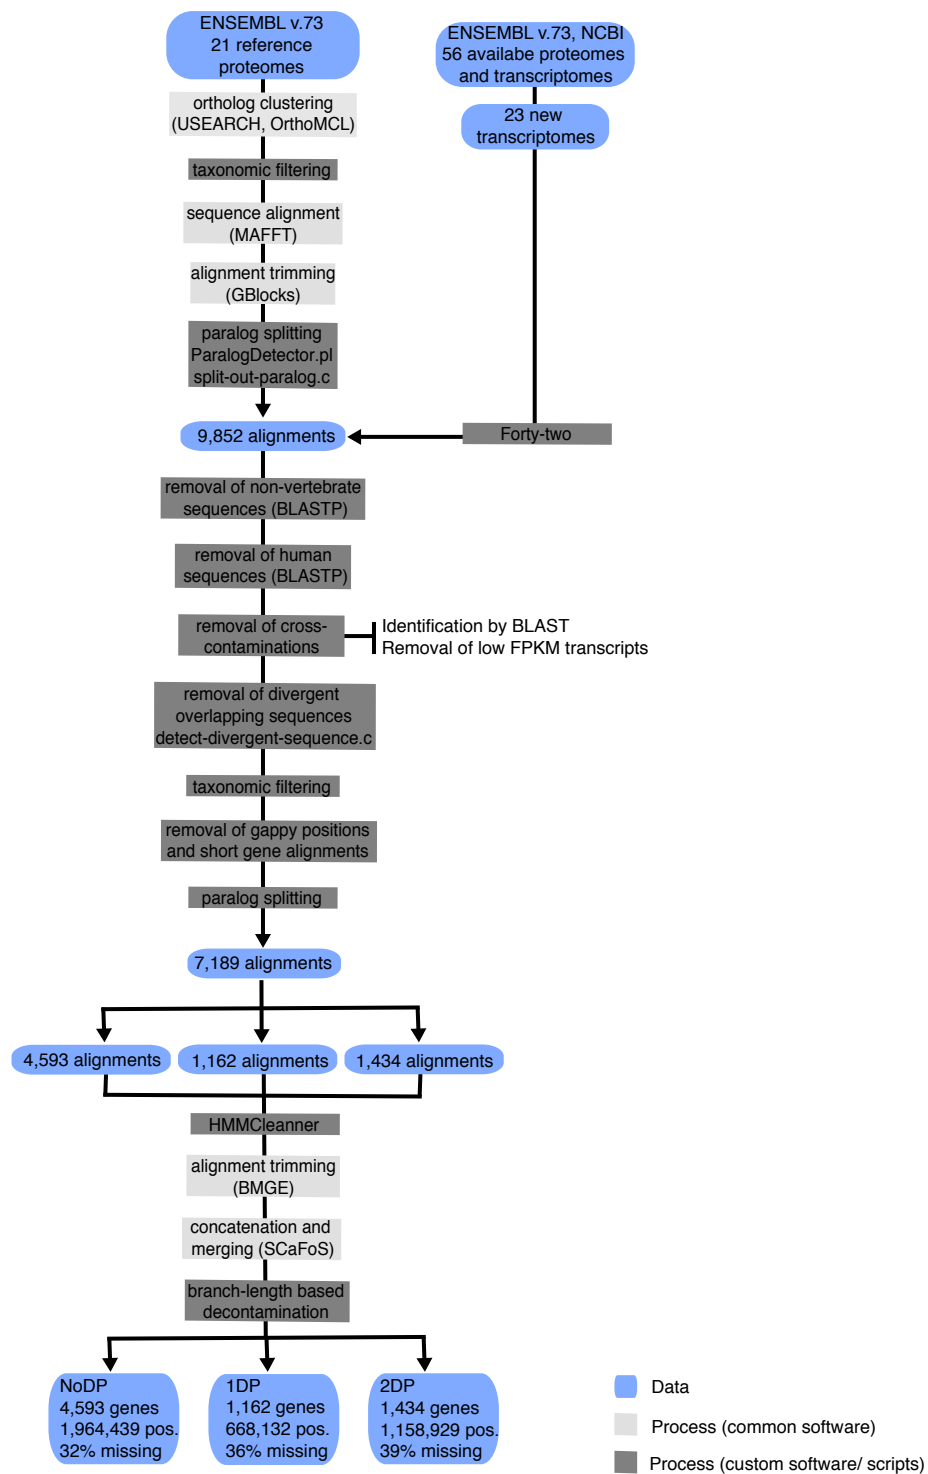

**Supplementary Figure 2.** Flowchart of the bioinformatic pipeline developed for phylogenomic dataset assembly. Abbreviations: FPKM, fragments per Kb per million mapped reads; pos., amino acid positions.

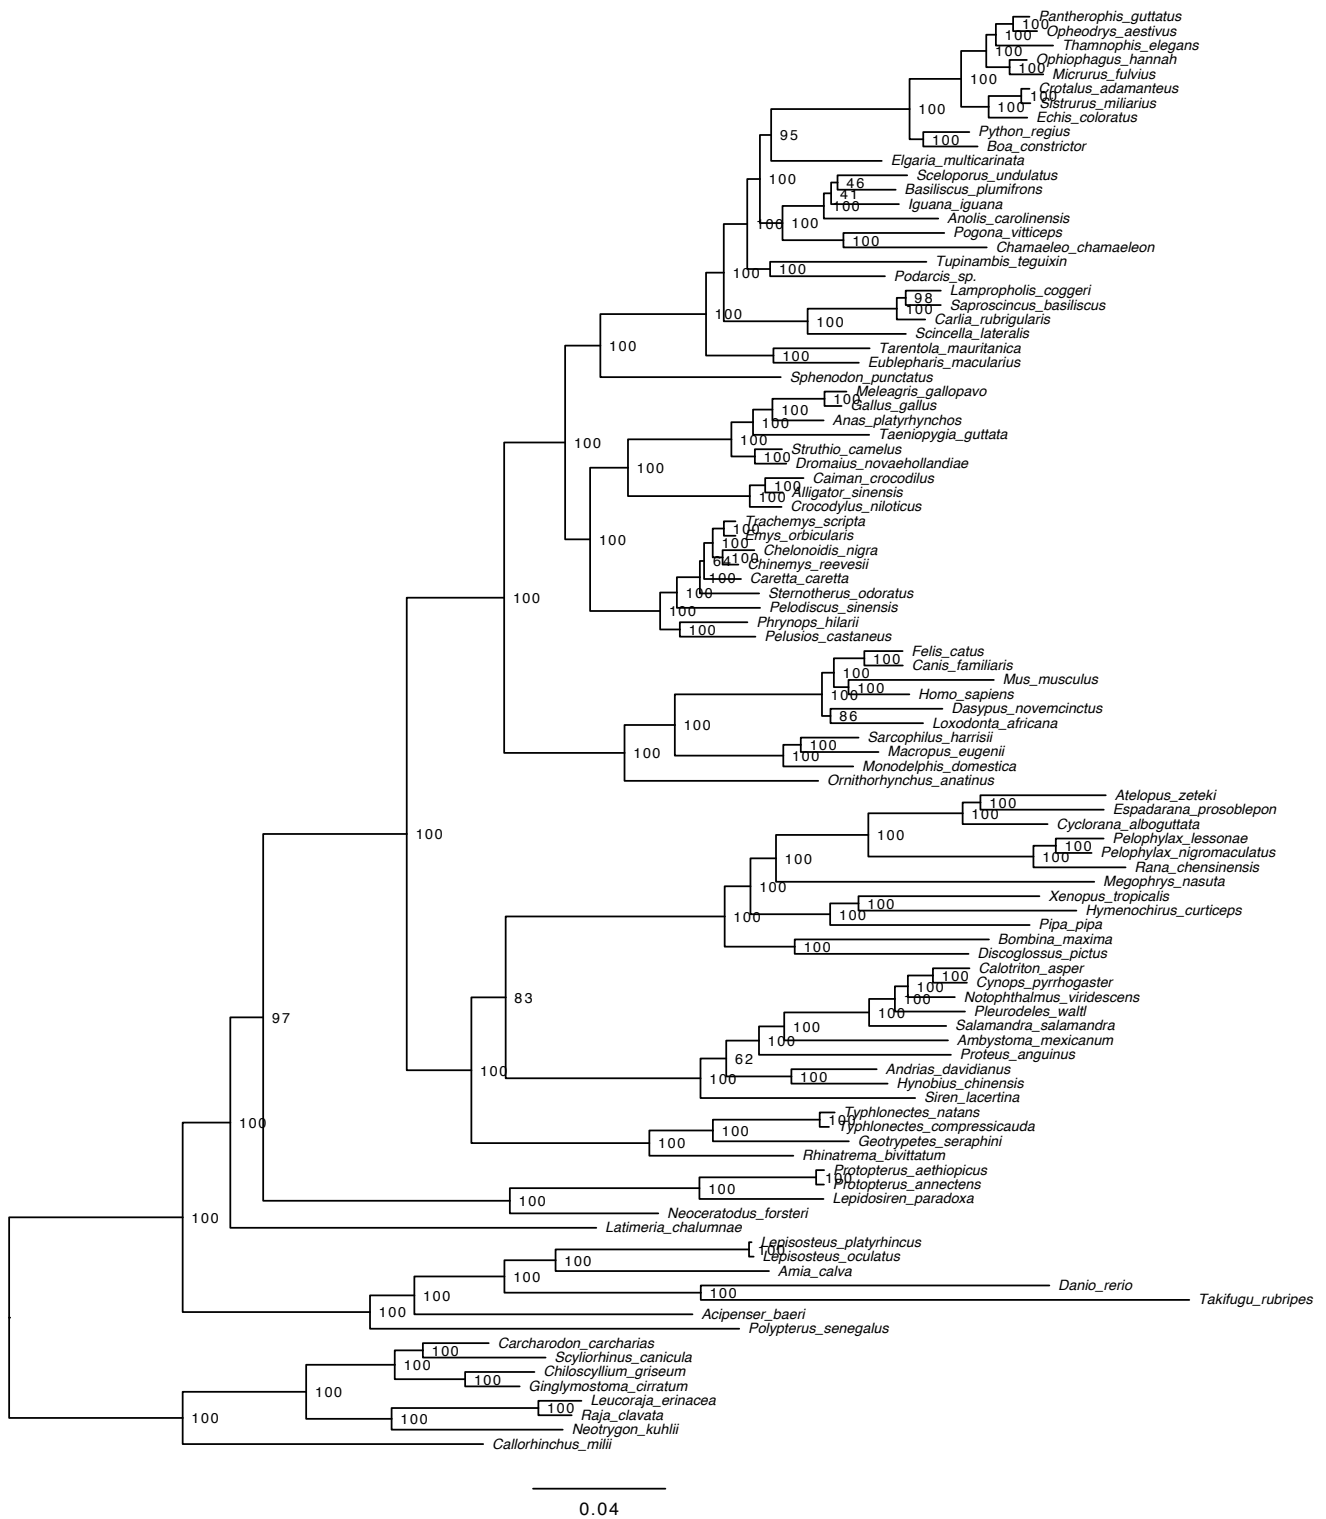

**Supplementary Figure 3.** Maximum likelihood phylogeny estimated from the NoDP dataset under the GTR+ $\Gamma$  model in RAxML. Numbers at nodes are non-parametric bootstrap support and scale bar is in substitutions site<sup>-1</sup>. This topology is identical to that recovered by BI on the 2DP dataset under the CAT+ $\Gamma$  model, and differs from that in Fig. 2a (BI analysis of the NoDP dataset under CAT+ $\Gamma$ ) on the position of *Elgaria*, which is recovered as sister group of snakes, and *Sternotherus*, which is recovered as sister group of *Caretta*.

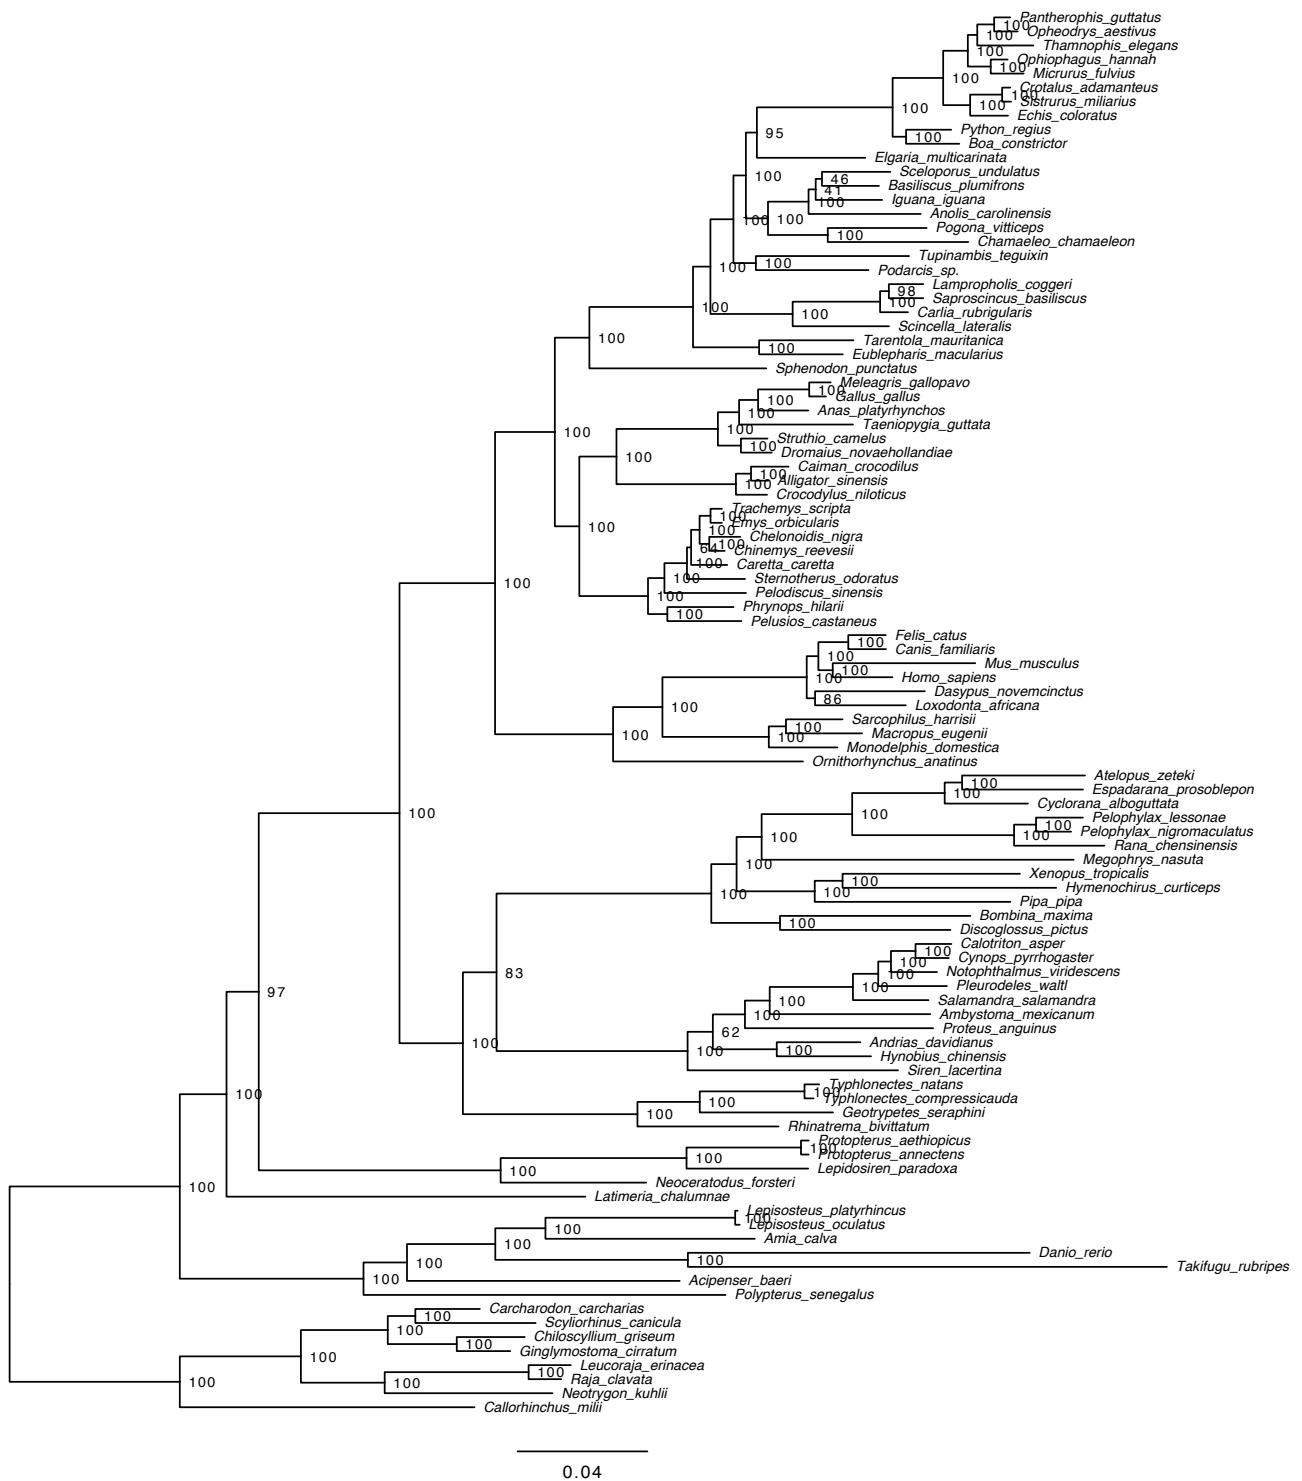

**Supplementary Figure 4.** Maximum likelihood phylogeny estimated from the NoDP dataset under the LG+ $\Gamma$ +F model in RAxML. Numbers at nodes are non-parametric bootstrap support and scale bar is substitutions site<sup>-1</sup>. The ML tree estimated under LG+ $\Gamma$ +F differs from that in Fig. 2a (BI analysis of the NoDP dataset under CAT+ $\Gamma$ ) on the position of *Elgaria*, which is recovered as sister group of snakes, the position of *Anolis*, which is basal to *Iguana*, *Basiliscus* and *Sceloporus*, and the position of *Siren*, which is recovered as the earliest branching salamander.

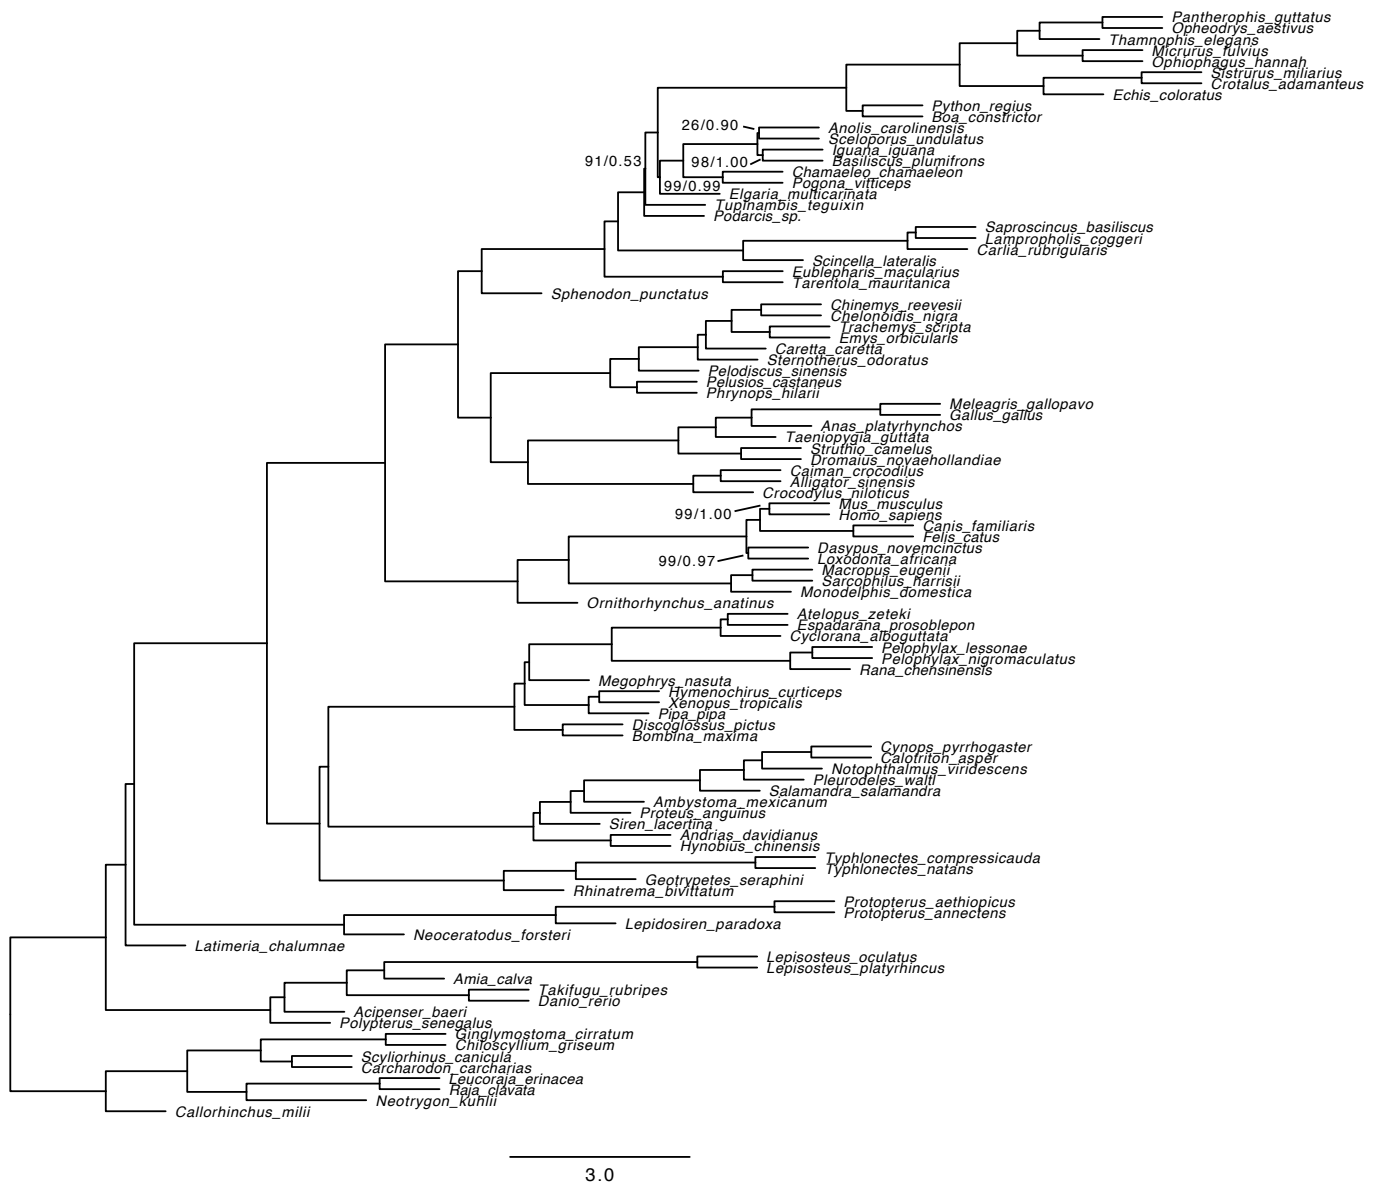

**Supplementary Figure 5.** Coalescent-based tree estimated from the NoDP dataset using ASTRAL-II. All nodes received maximum support from multi-locus bootstrapping and quartet-based local node support, except for nodes where the actual numbers are shown. Scale bar is in coalescent units. This species tree differs from the BI tree obtained from a concatenated matrix of the same dataset (Fig. 2a) in the relative positions of *Lepisosteus* (and incongruence that is strongly supported), and the relative positions of *Tupinambis* with *Podarcis* and *Caretta* with *Pelodiscus*; both disagreements that are lowly supported.

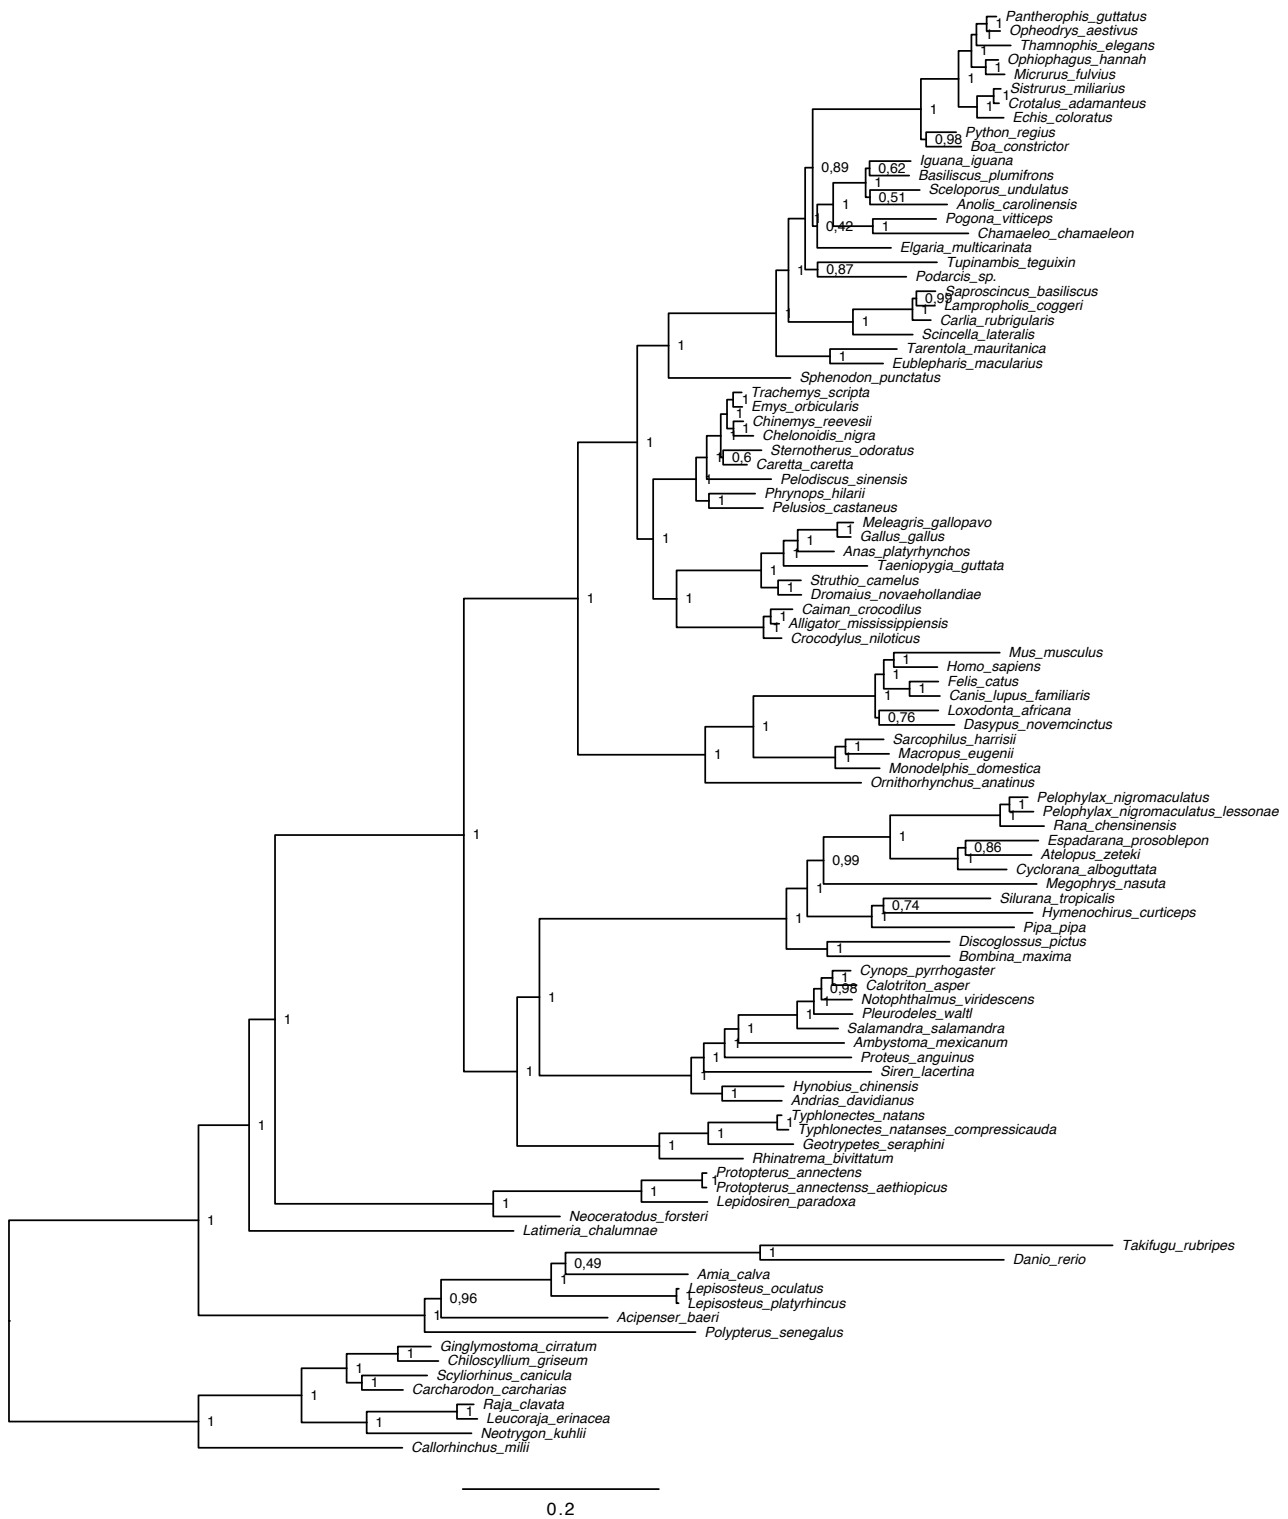

**Supplementary Figure 6.** Bayesian majority-rule consensus tree reconstructed from the 1DP dataset, estimated from 100 gene-jackknife replicates (~50,000 amino acid positions each) under the CAT+ $\Gamma$  model in PhyloBayes. Numbers at nodes are posterior probabilities and scale bar is in substitutions site<sup>-1</sup>. The BI tree estimated from the 1DP dataset differs from that in Fig. 2a (NoDP dataset) on the position of *Amia*, which is recovered as sister group of *Takifugu* + *Danio*, and *Sternotherus*, which is recovered as sister group of *Caretta*.

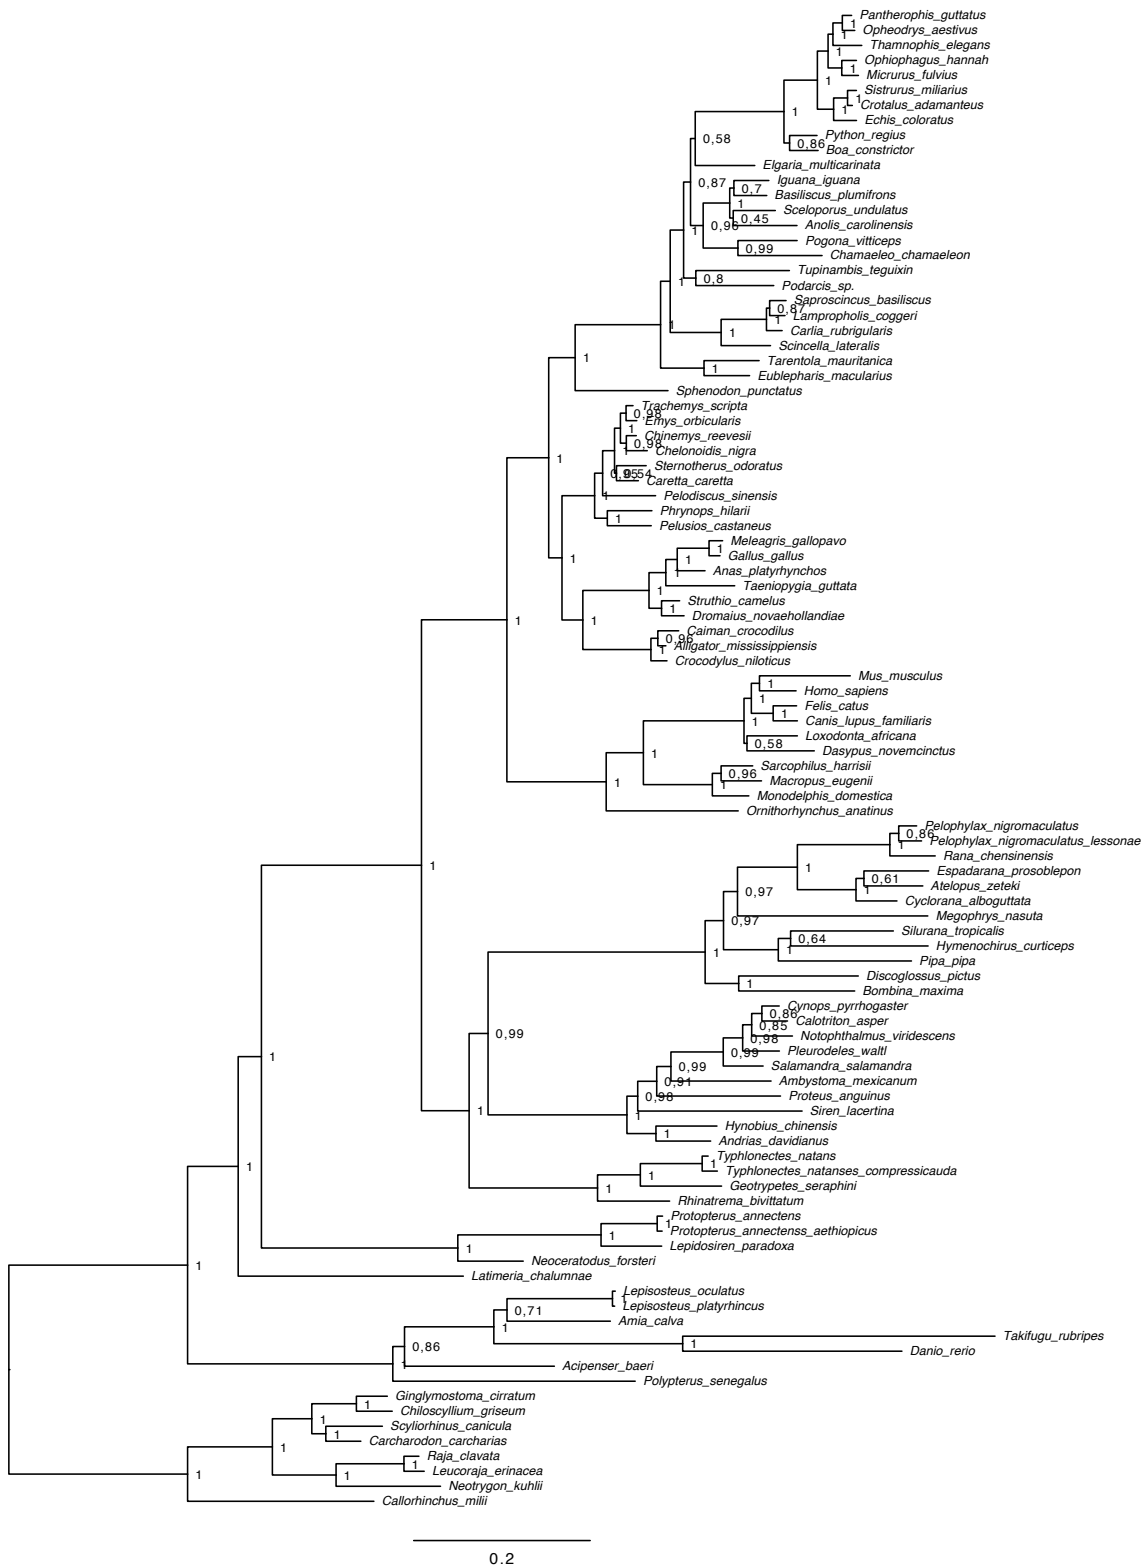

**Supplementary Figure 7.** Bayesian majority-rule consensus tree reconstructed from the 2DP dataset, estimated from 100 gene-jackknife replicates (~50,000 amino acid positions each) under the CAT+ $\Gamma$  model in PhyloBayes. Numbers at nodes are posterior probabilities and scale bar is in substitutions site<sup>-1</sup>. This topology is identical to that recovered by ML on the NoDP dataset under the GTR+ $\Gamma$  model, and differs from that in Fig. 2a (BI analysis of the NoDP dataset under CAT+ $\Gamma$ ) on the position of *Elgaria*, which is recovered as sister group of snakes, and *Sternotherus*, which is recovered as sister group of *Caretta*.

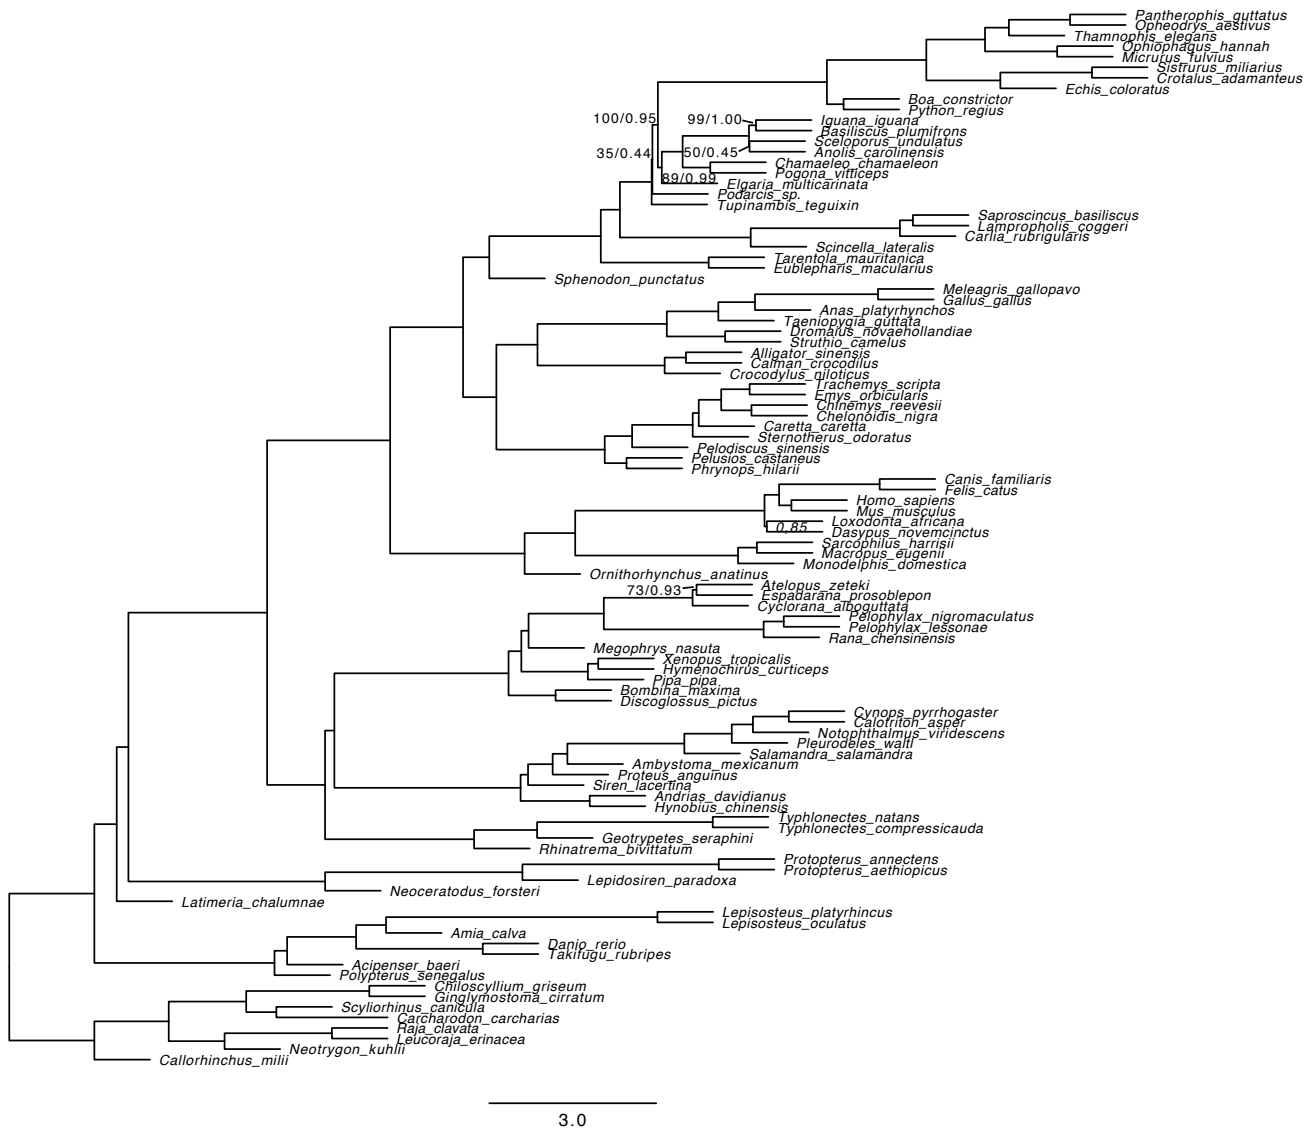

**Supplementary Figure 8.** Coalescent-based tree estimated from the 1DP dataset using ASTRAL-II. All nodes received maximum support from multi-locus bootstrapping and quartet-based local node support, except for nodes where the actual numbers are shown. Scale bar is in coalescent units. This species tree differs from the BI tree obtained from a concatenated matrix of the same dataset (Supplementary Fig. 6) in the relative positions of *Lepisosteus* (and incongruence that is strongly supported), and the relative positions of *Tupinambis* with *Podarcis* and *Caretta* with *Pelodiscus*; both disagreements that are lowly supported.

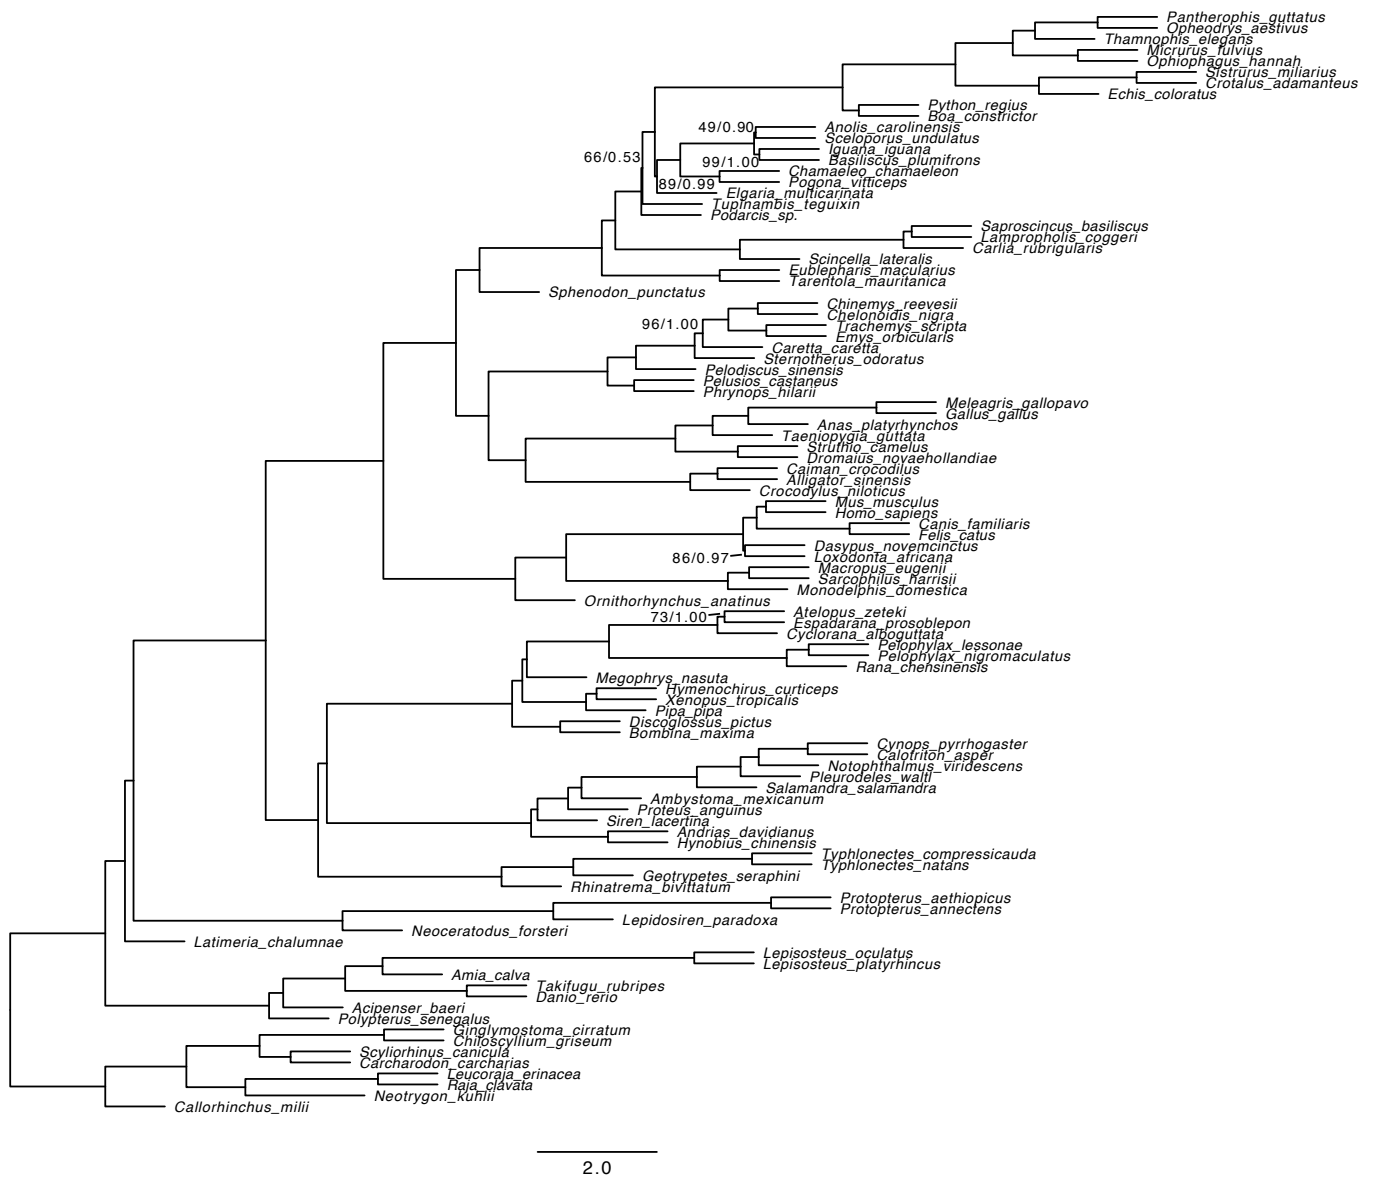

**Supplementary Figure 9.** Coalescent-based tree estimated from the 2DP dataset using ASTRAL-II. All nodes received maximum support from multi-locus bootstrapping and quartet-based local node support, except for nodes where the actual numbers are shown. Scale bar is in coalescent units. This species tree differs from the BI tree obtained from a concatenated matrix of the same dataset (Supplementary Fig. 7) in the relative positions of *Lepisosteus* (and incongruence that is strongly supported), and the relative positions of *Tupinambis* with *Podarcis* and *Caretta* with *Pelodiscus*; both disagreements that are lowly supported.



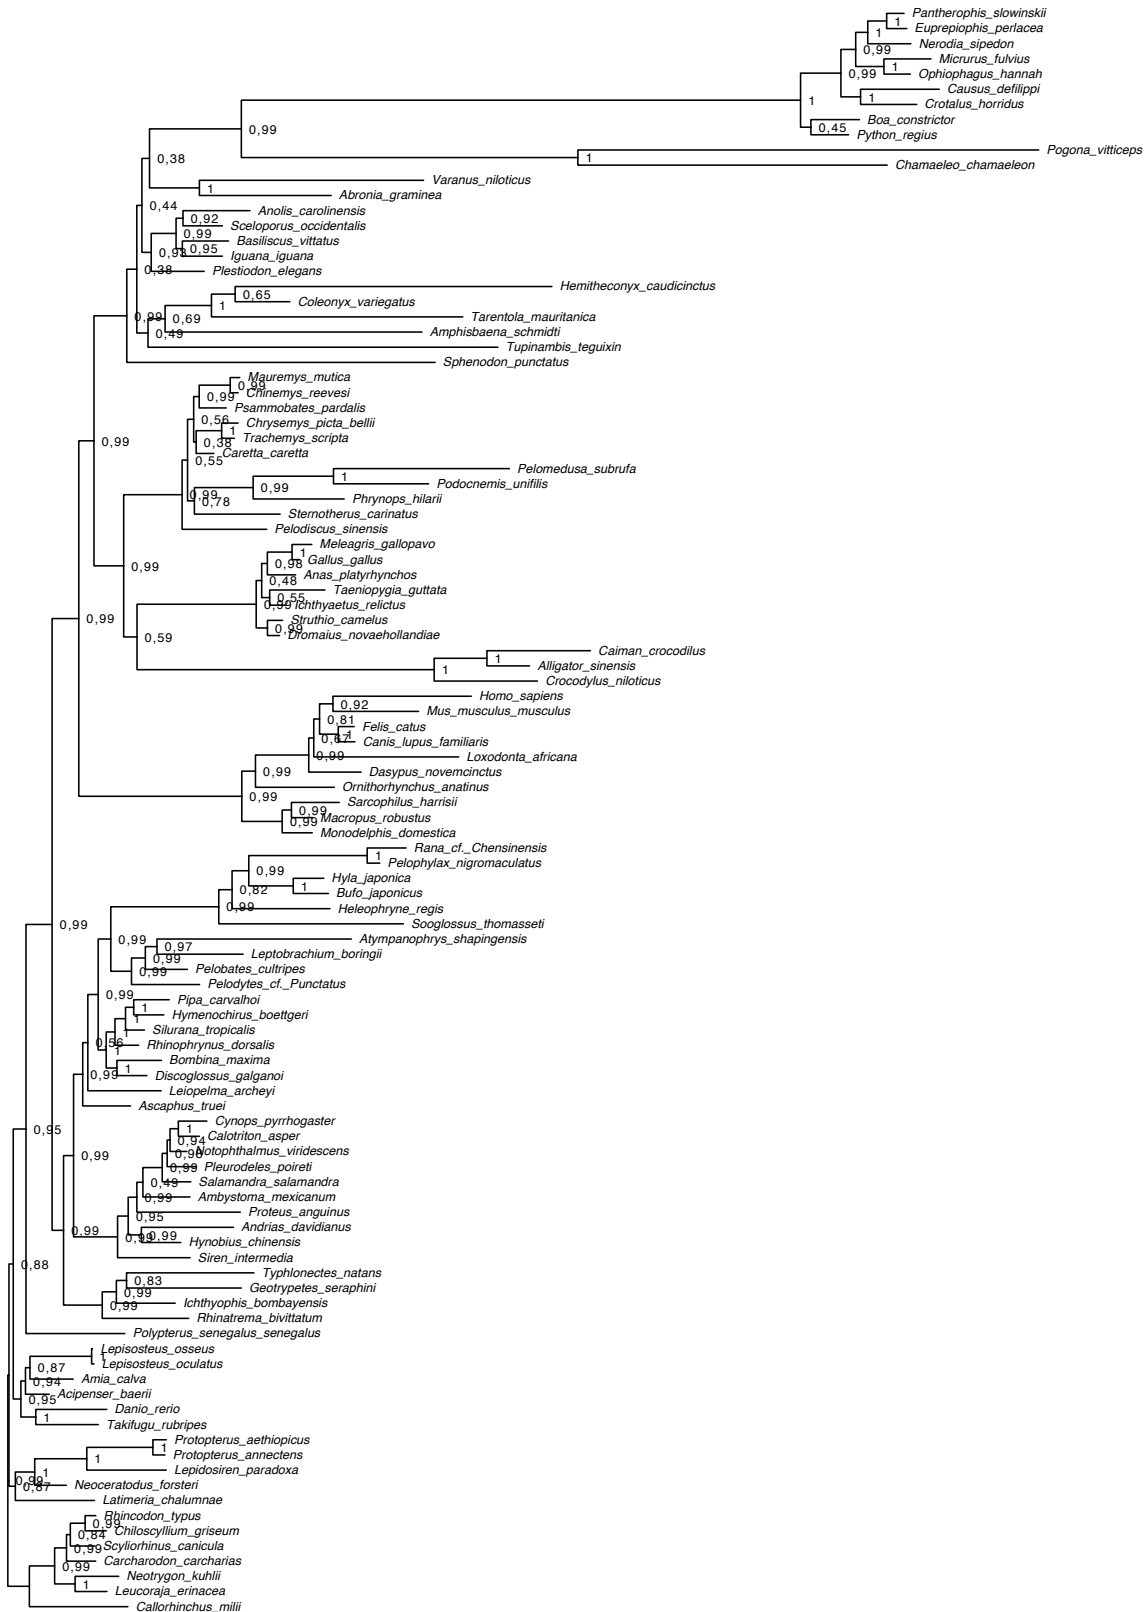

0.4

**Supplementary Figure 10.** Bayesian majority-rule consensus tree reconstructed from the mitochondrial dataset with 106 species (2,773 amino acid positions) under the CAT-GTR+Γ model in PhyloBayes. Numbers at nodes are posterior probabilities and scale bar is in substitutions site<sup>-1</sup>.

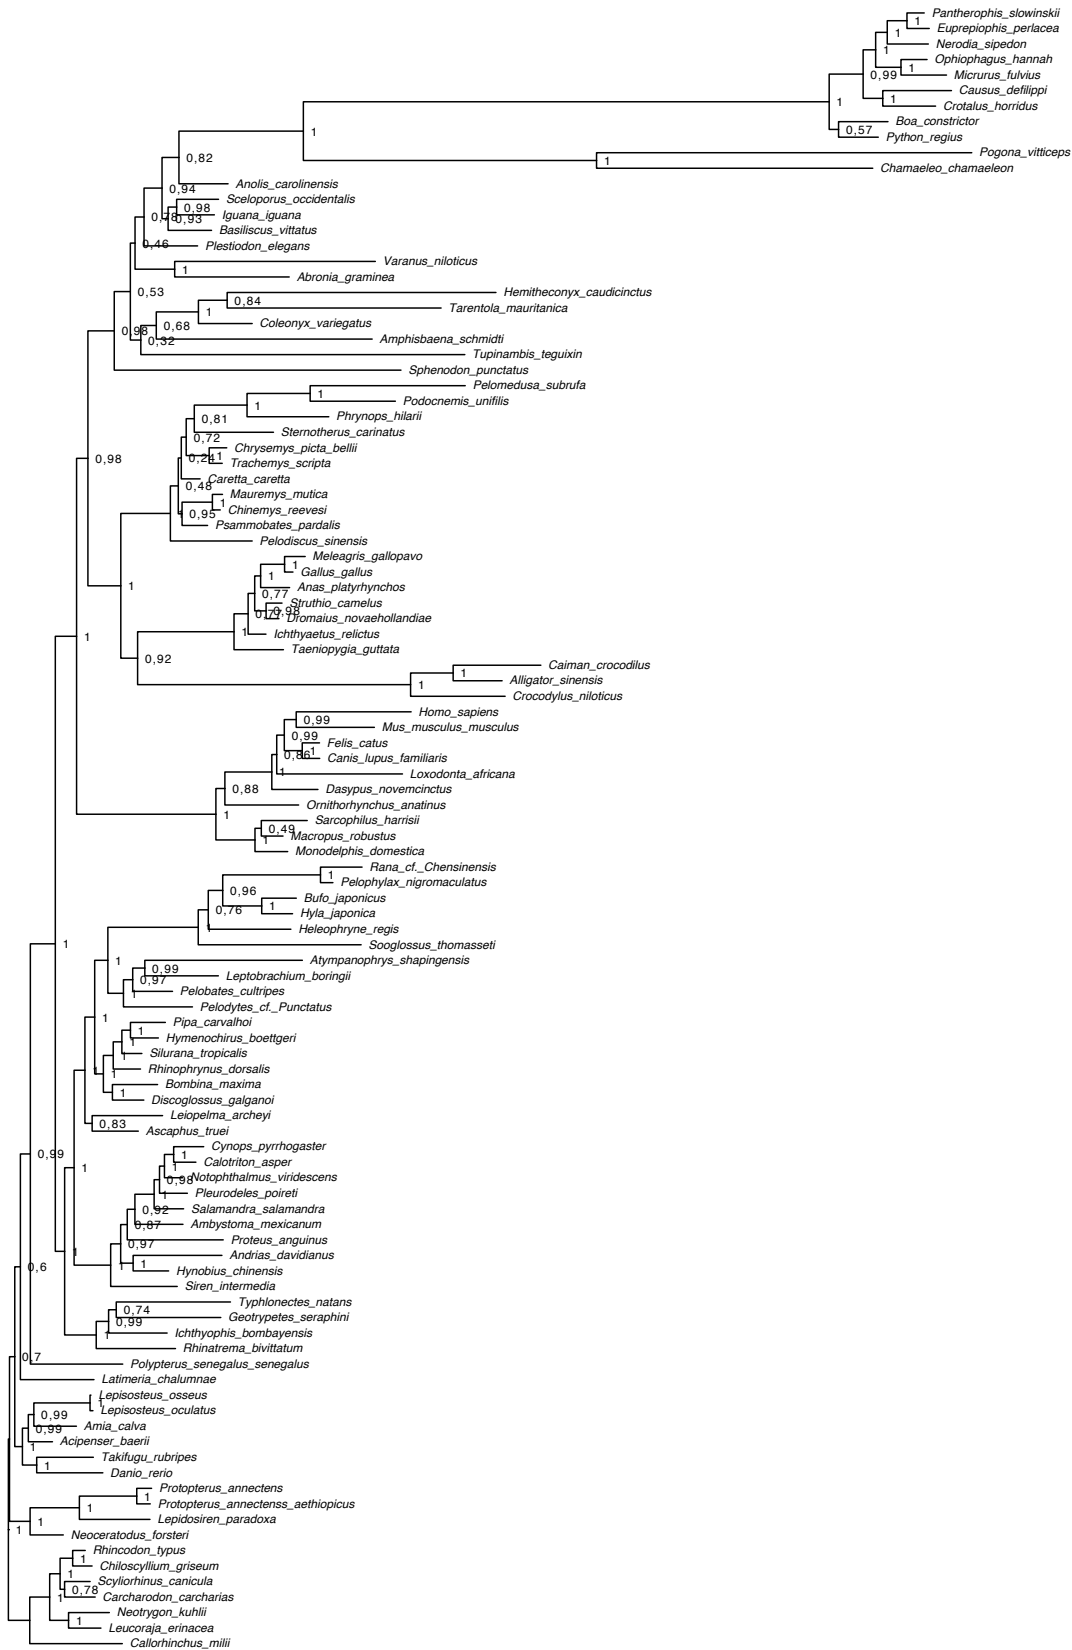

0.3

**Supplementary Figure 11.** Bayesian majority-rule consensus tree reconstructed from the mitochondrial dataset with 106 species (2,773 amino acid positions) under the CAT+Γ model in PhyloBayes. Numbers at nodes are posterior probabilities and scale bar is in substitutions site<sup>-1</sup>.

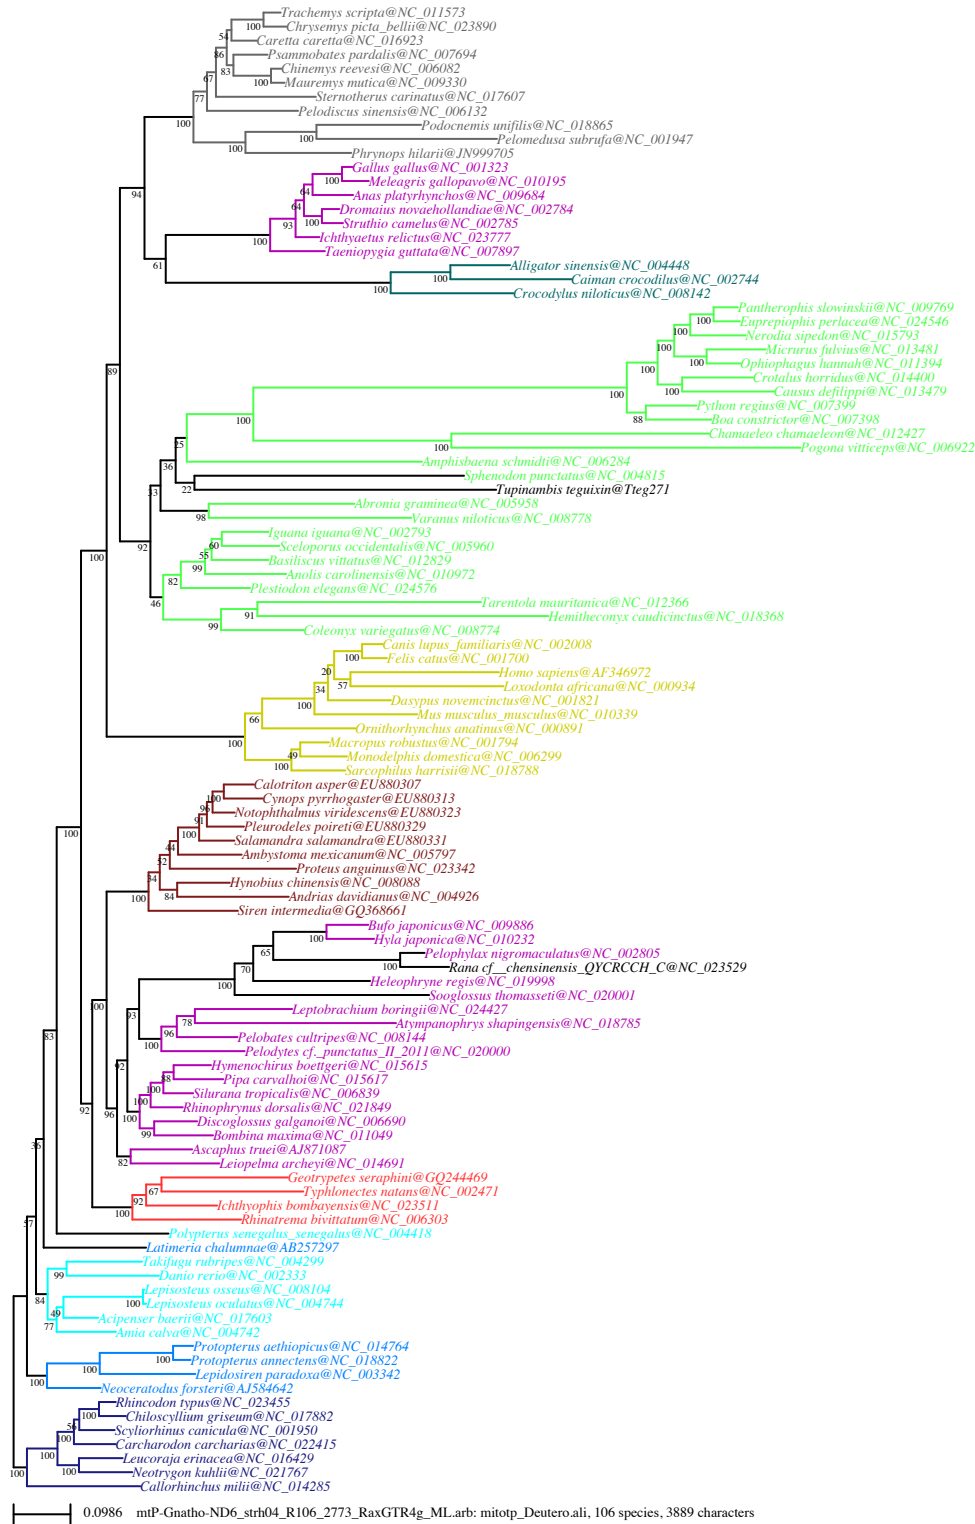

**Supplementary Figure 12.** Maximum likelihood phylogeny estimated from the mitochondrial dataset with 106 species (2,773 amino acid positions) under the GTR+ $\Gamma$  model in RAxML. Numbers at nodes are non-parametric bootstrap support and scale bar is substitutions site<sup>-1</sup>.

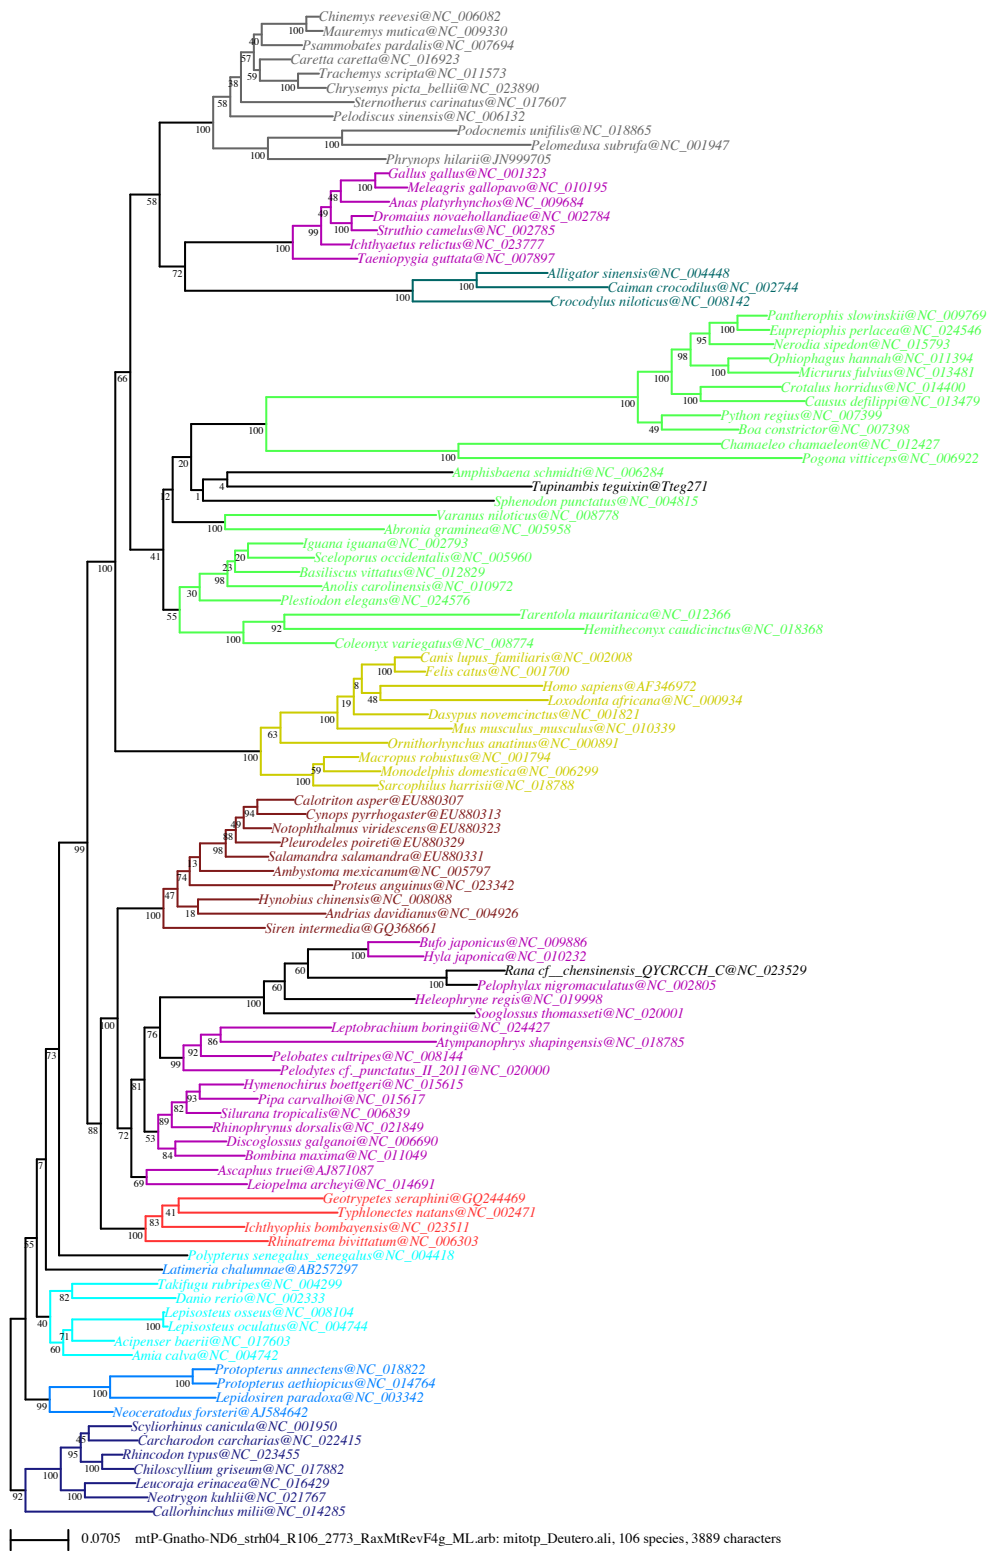

**Supplementary Figure 13.** Maximum likelihood phylogeny estimated from the mitochondrial dataset with 106 species (2,773 amino acid positions) under the MTREV+ $\Gamma$  model in RAxML. Numbers at nodes are non-parametric bootstrap support and scale bar is substitutions site<sup>-1</sup>.

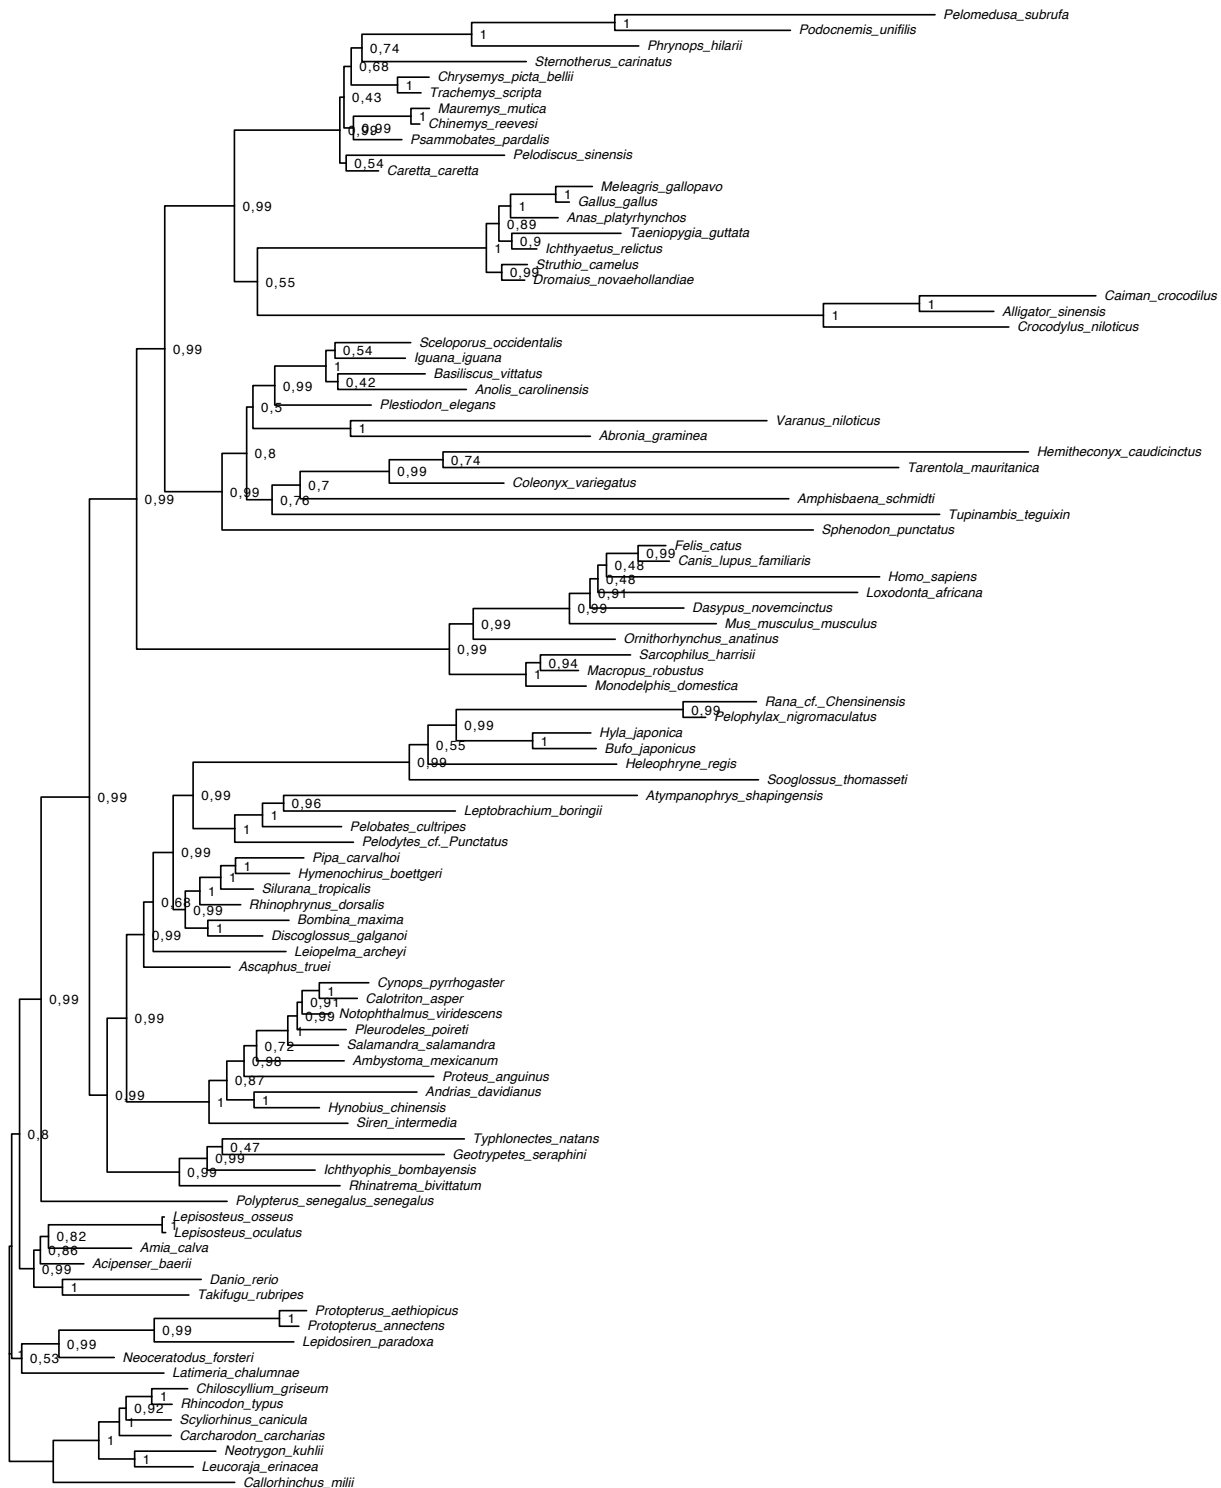

0.3

**Supplementary Figure 14.** Bayesian majority-rule consensus tree reconstructed from the mitochondrial dataset with 95 species (2,866 amino acid positions) under the CAT-GTR+ $\Gamma$  model in PhyloBayes. Numbers at nodes are posterior probabilities and scale bar is in substitutions site<sup>-1</sup>.

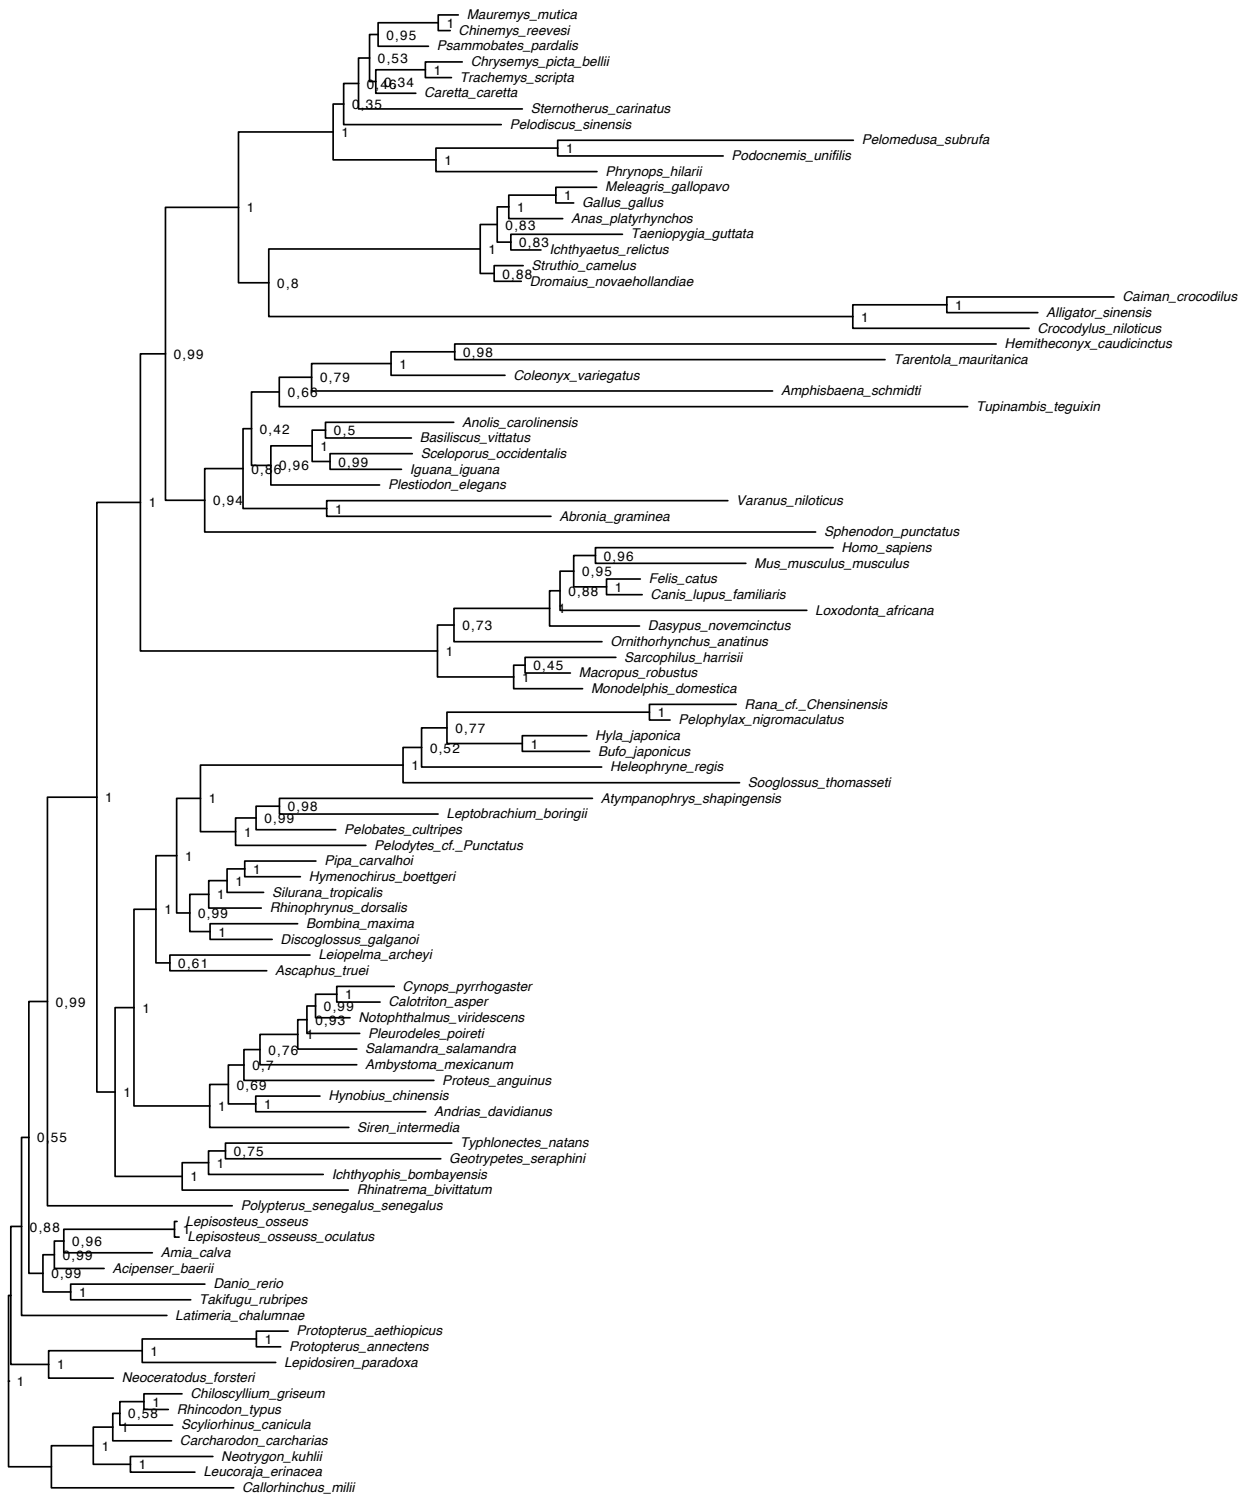

0.2

**Supplementary Figure 15.** Bayesian majority-rule consensus tree reconstructed from the mitochondrial dataset with 95 species (2,866 amino acid positions) under the CAT+ $\Gamma$  model in PhyloBayes. Numbers at nodes are posterior probabilities and scale bar is in substitutions site<sup>-1</sup>.

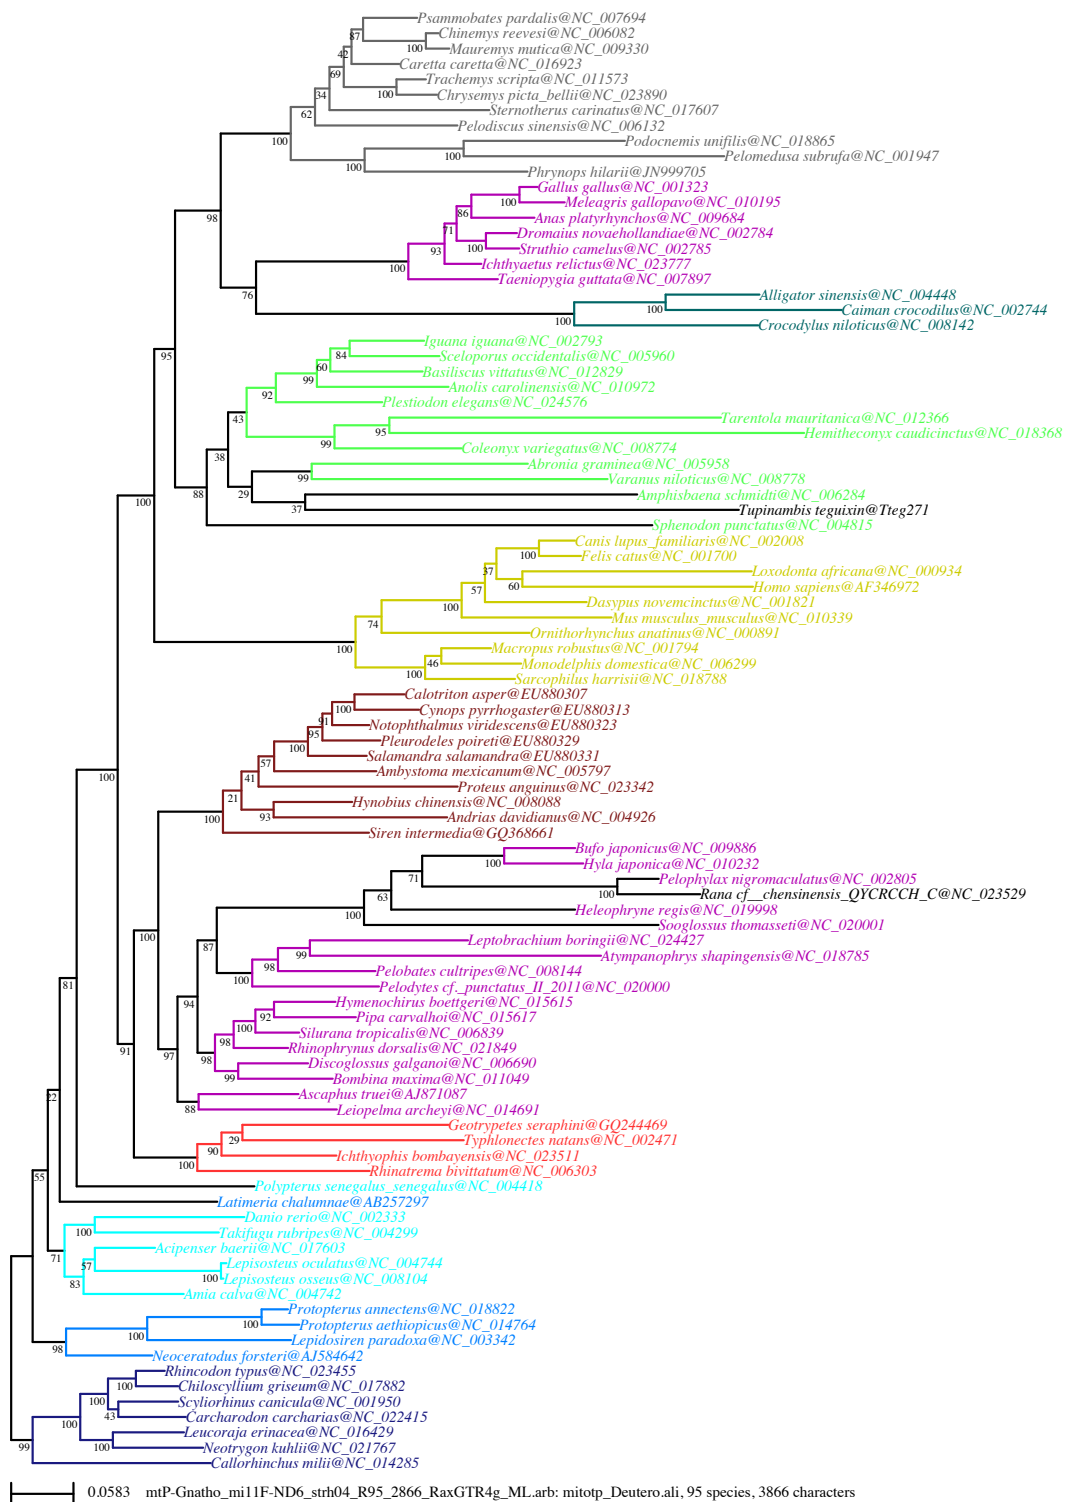

**Supplementary Figure 16.** Maximum likelihood phylogeny estimated from the mitochondrial dataset with 95 species (2,866 amino acid positions) under the GTR+ $\Gamma$  model in RAxML. Numbers at nodes are non-parametric bootstrap support and scale bar is substitutions site<sup>-1</sup>.

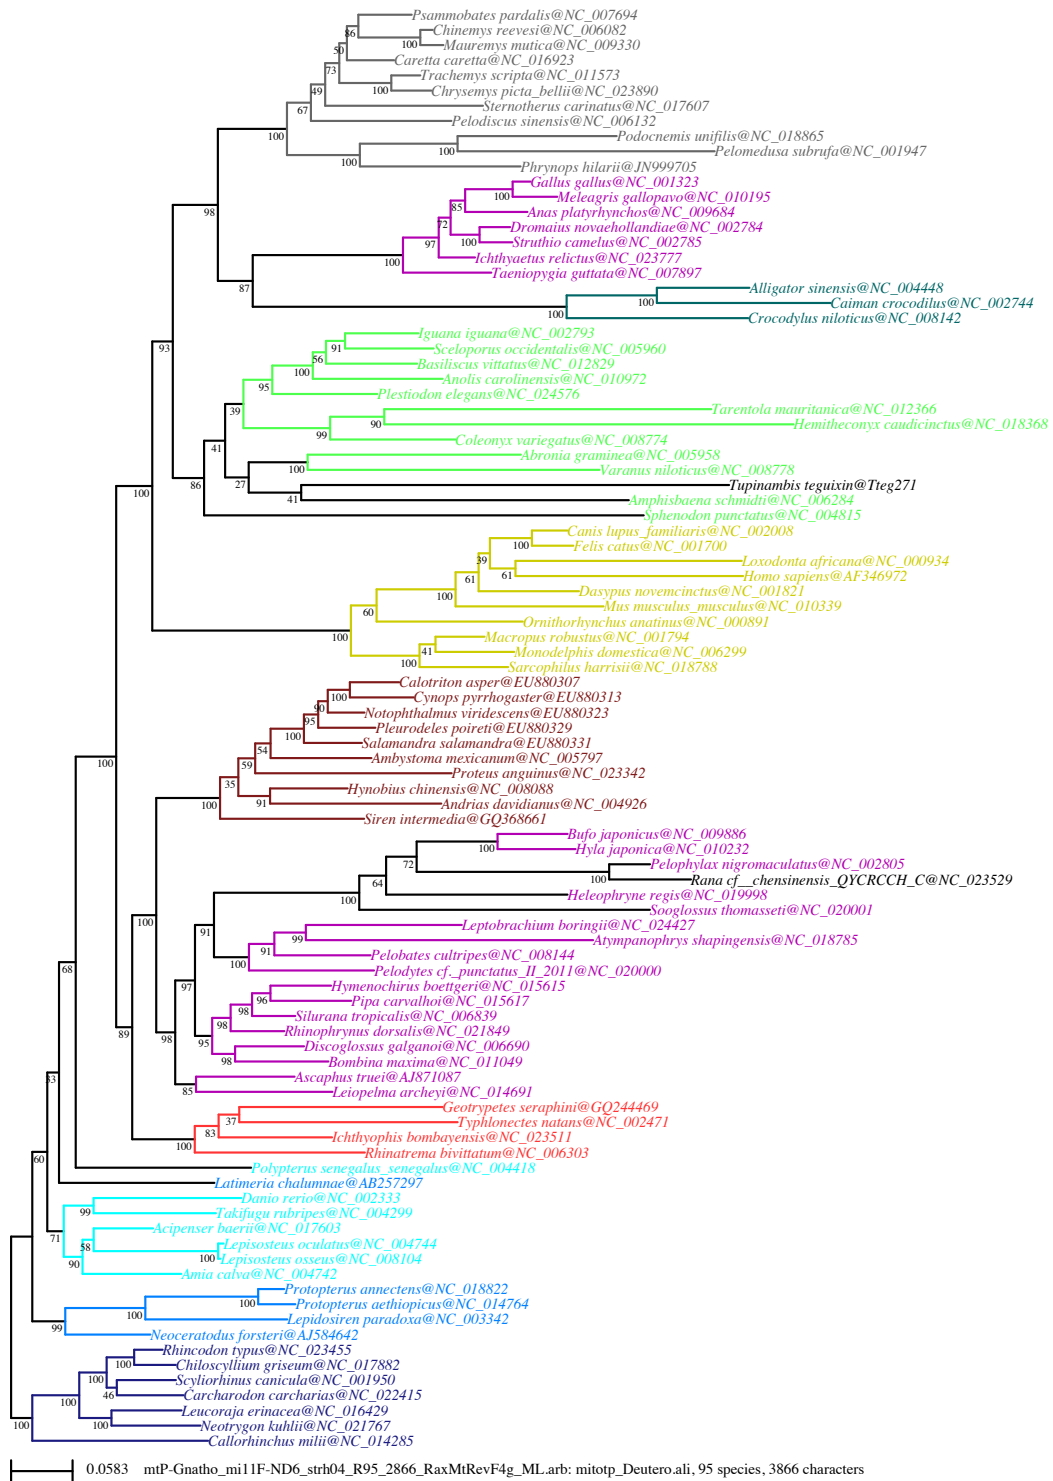

**Supplementary Figure 17.** Maximum likelihood phylogeny estimated from the mitochondrial dataset with 95 species (2,866 amino acid positions) under the MTREV+ $\Gamma$  model in RAXML. Numbers at nodes are non-parametric bootstrap support and scale bar is substitutions site<sup>-1</sup>.



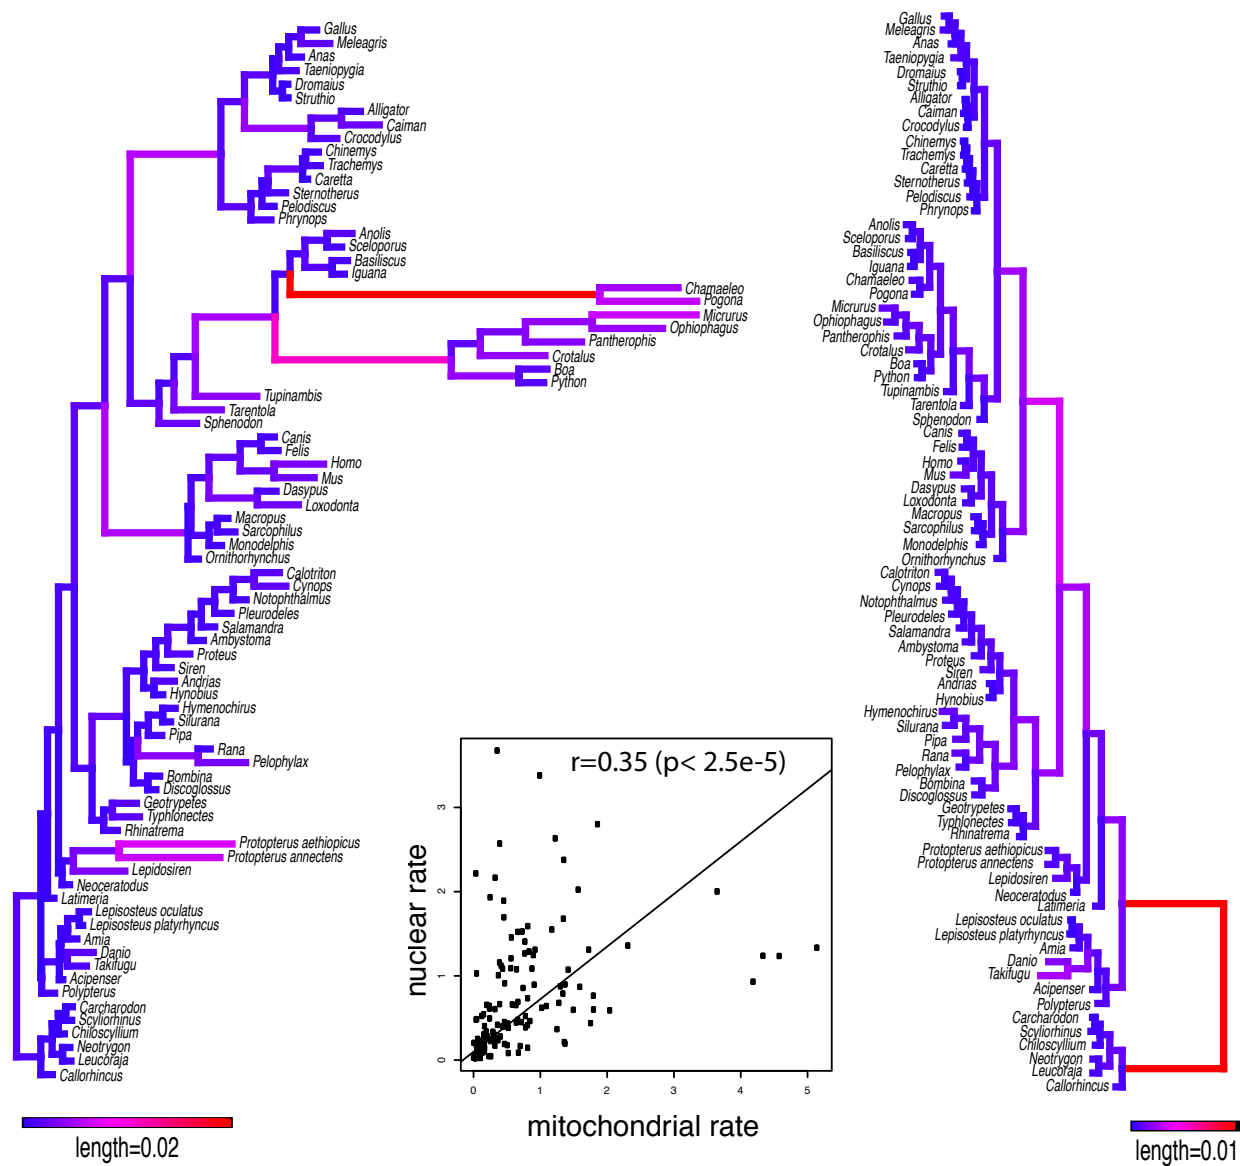

**Supplementary Figure 18.** Relationship between mitochondrial (left tree) and nuclear (right tree) substitution rates. Trees show the 78 species that are present in both the mitochondrial and nuclear datasets, and branch lengths represent the number of substitution site<sup>-1</sup> million year<sup>-1</sup>. Scatter plot shows the correlation between mitochondrial and nuclear rates as measured from individual branches in the trees (N=137) and shows the Pearson's correlation.

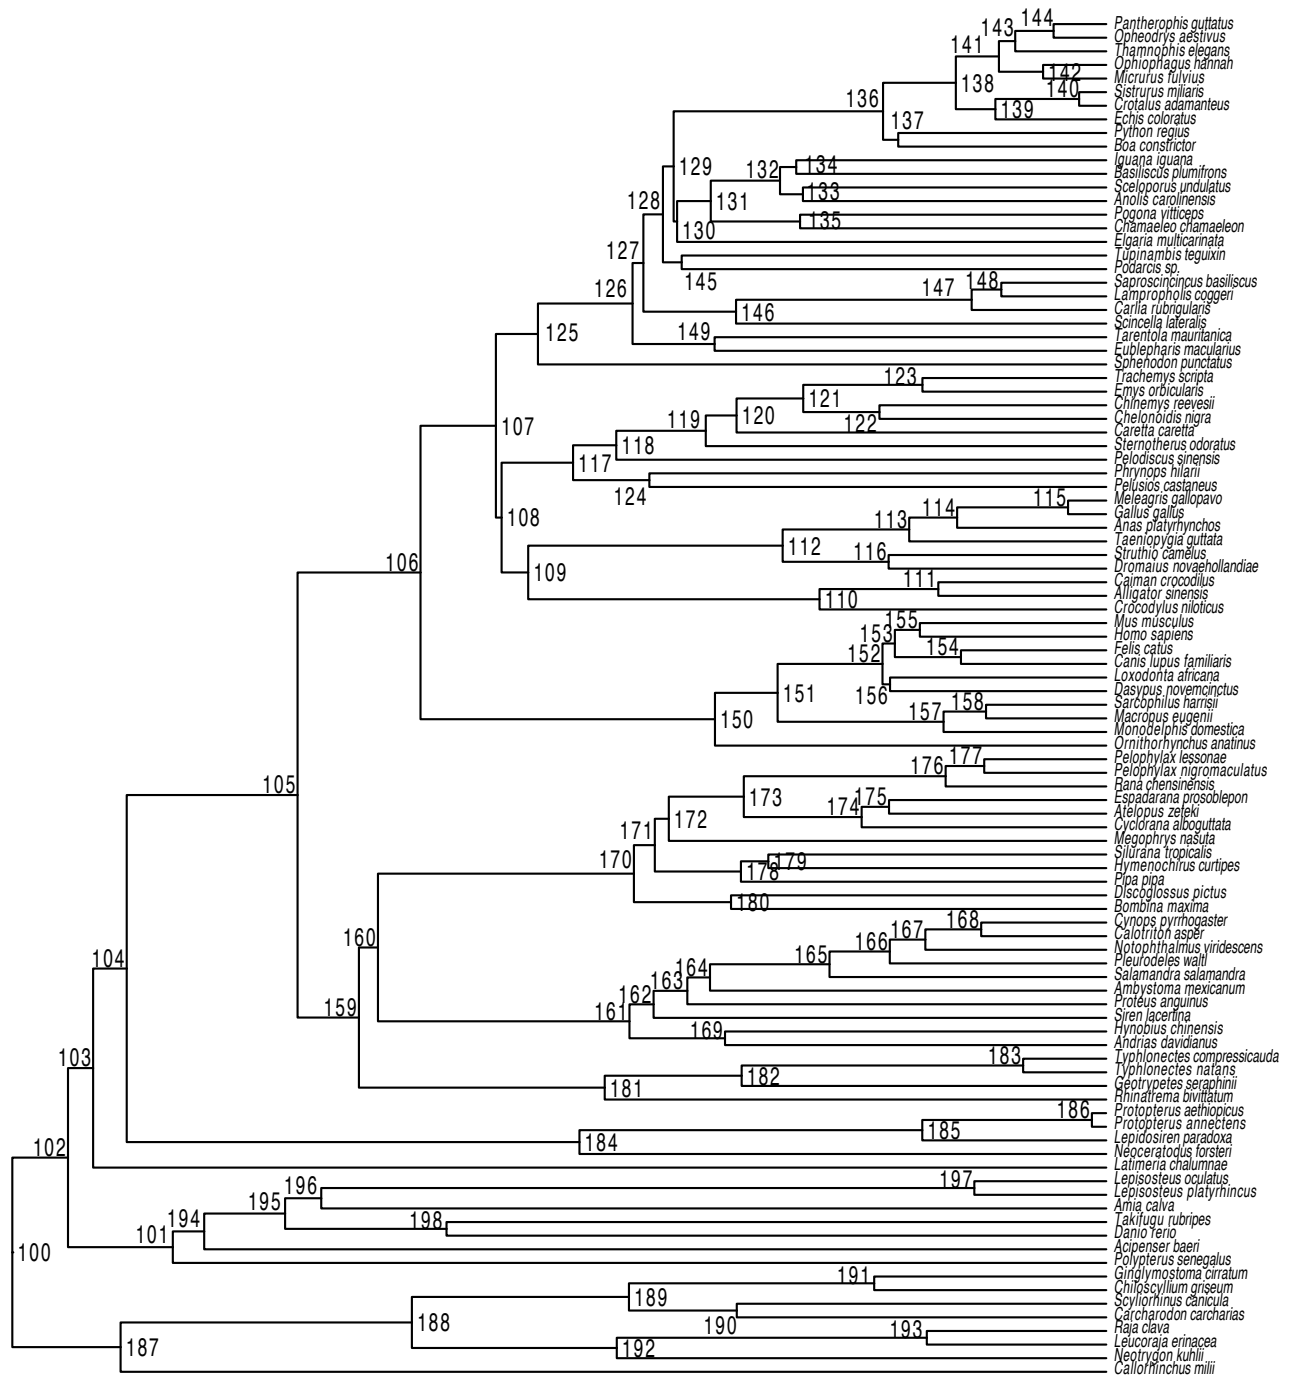

**Supplementary Figure 19.** Tree showing the node IDs corresponding to Supplementary Tables 3, 4, 8 and 9.

## Supplementary References

- 1 Grabherr, M. G. *et al.* Full-length transcriptome assembly from RNA-Seq data without a reference genome. *Nat. Biotechnol.* **29**, 644-652 (2011).
- 2 Haas, B. J. *et al.* *De novo* transcript sequence reconstruction from RNA-seq using the Trinity platform for reference generation and analysis. *Nat. Protoc.* **8**, 1494-1512 (2013).
- 3 Schulz, M. H., Zerbino, D. R., Vingron, M. & Birney, E. Oases: Robust *de novo* RNA-seq assembly across the dynamic range of expression levels. *Bioinformatics* **28**, 1086-1092 (2012).
- 4 Irisarri, I. & Meyer, A. The identification of the closest living relative(s) of tetrapods: Phylogenomic lessons for resolving short ancient internodes. *Syst. Biol.* **65**, 1057-1075 (2016).
- 5 Chevreur, B., Wetter, T. & Suhai, S. in *Computer Science and Biology: Proceedings of the German Conference on Bioinformatics (GCB)* p.45-56.
- 6 Venkatesh, B. *et al.* Elephant shark genome provides unique insights into gnathostome evolution. *Nature* **505**, 174-179 (2014).
- 7 Irisarri, I., San Mauro, D., Green, D. M. & Zardoya, R. The complete mitochondrial genome of the relict frog *Leiopelma archeyi*: Insights into the root of the frog tree of life. *Mitochondr. DNA* **21**, 173-182 (2010).
- 8 Pyron, R. A., Burbrink, F. T. & Wiens, J. J. A phylogeny and revised classification of Squamata, including 4161 species of lizards and snakes. *BMC Evol. Biol.* **13**, 93 (2013).
- 9 Edgar, R. C. Search and clustering orders of magnitude faster than BLAST. *Bioinformatics* **26**, 2460-2461 (2010).
- 10 Li, L., Stoeckert, C. J. & Roos, D. S. OrthoMCL: Identification of ortholog groups for eukaryotic genomes. *Genome Res.* **13**, 2178-2189 (2003).
- 11 Katoh, K. & Standley, D. M. MAFFT multiple sequence alignment software version 7: Improvements in performance and usability. *Mol. Biol. Evol.* **30**, 772-780 (2013).
- 12 Castresana, J. Selection of conserved blocks from multiple alignments for their use in phylogenetic analysis. *Mol. Biol. Evol.* **17**, 540-552 (2000).
- 13 Stamatakis, A. RAxML version 8: A tool for phylogenetic analysis and post-analysis of large phylogenies. *Bioinformatics* **30**, 1312-1313 (2014).
- 14 Meyer, A. & Schartl, M. Gene and genome duplications in vertebrates: The one-to-four (-to-eight in fish) rule and the evolution of novel gene functions. *Curr. Opin. Cell Biol.* **11**, 699-704 (1999).
- 15 Taylor, J. S., Braasch, I., Frickey, T., Meyer, A. & Van de Peer, Y. Genome duplication, a trait shared by 22,000 species of ray-finned fish. *Genome Res.* **13**, 382-390 (2003).
- 16 Altschul, S. F., Gish, W., Miller, W., Myers, E. W. & Lipman, D. J. Basic local alignment search tool. *J. Mol. Biol.* **215**, 403-410 (1990).
- 17 Li, B. & Dewey, C. RSEM: Accurate transcript quantification from RNA-Seq data with or without a reference genome. *BMC Bioinformatics* **12**, 323 (2011).
- 18 Langmead, B., Trapnell, C., Pop, M. & Salzberg, S. Ultrafast and memory-efficient alignment of short DNA sequences to the human genome. *Genome Biol.* **10**, R25 (2009).
- 19 Philippe, H. *et al.* Resolving difficult phylogenetic questions: Why more sequences are not enough. *PLoS Biol.* **9**, e1000602 (2011).
- 20 Prosdocimi, E. M. *et al.* Errors in ribosomal sequence datasets generated using PCR-coupled 'panbacterial' pyrosequencing, and the establishment of an improved approach. *Mol. Cell Probes* **27**, 65-67 (2013).
- 21 Amemiya, C. T. *et al.* The African coelacanth genome provides insights into tetrapod evolution. *Nature* **496**, 311-316 (2013).

- 22 Criscuolo, A. & Gribaldo, S. BMGE (Block Mapping and Gathering with Entropy): A new software for selection of phylogenetic informative regions from multiple sequence alignments. *BMC Evol. Biol.* **10**, 210 (2010).
- 23 Roure, B., Rodriguez-Ezpeleta, N. & Philippe, H. SCaFoS: A tool for selection, concatenation and fusion of sequences for phylogenomics. *BMC Evol. Biol.* **7**, S2 (2007).
- 24 Hara, Y. *et al.* Optimizing and benchmarking de novo transcriptome sequencing: from library preparation to assembly evaluation. *BMC Genomics* **16**, 977 (2015).
- 25 Simão, F. A., Waterhouse, R. M., Ioannidis, P., Kriventseva, E. V. & Zdobnov, E. M. BUSCO: assessing genome assembly and annotation completeness with single-copy orthologs. *Bioinformatics* **31**, 3210-3212 (2015).
- 26 Buchfink, B., Xie, C. & Huson, D. H. Fast and sensitive protein alignment using DIAMOND. *Nat. Meth.* **12**, 59-60 (2015).
- 27 Altschul, S. *et al.* Gapped BLAST and PSI-BLAST: A new generation of protein database search programs. *Nucl. Acids Res.* **25**, 3389 - 3402 (1997).
- 28 Bernt, M. *et al.* A comprehensive analysis of bilaterian mitochondrial genomes and phylogeny. *Mol. Phylogenet. Evol.* **69**, 352-364 (2013).
- 29 Philippe, H. MUST, a computer package of Management Utilities for Sequences and Trees. *Nuc. Acids Res.* **21**, 5264-5272 (1993).
- 30 Delsuc, F., Tsagkogeorga, G., Lartillot, N. & Philippe, H. Additional molecular support for the new chordate phylogeny. *Genesis* **46**, 592-604 (2008).
- 31 Lartillot, N., Rodrigue, N., Stubbs, D. & Richer, J. PhyloBayes MPI: Phylogenetic reconstruction with infinite mixtures of profiles in a parallel environment. *Syst. Biol.* **62**, 611-615 (2013).
- 32 Mirarab, S. & Warnow, T. ASTRAL-II: coalescent-based species tree estimation with many hundreds of taxa and thousands of genes. *Bioinformatics* **31**, i44-i52 (2015).
- 33 Sayyari, E. & Mirarab, S. Fast coalescent-based computation of local branch support from quartet frequencies. *Mol. Biol. Evol.* **33**, 1654-1668 (2016).
- 34 Seo, T.-K. Calculating bootstrap probabilities of phylogeny using multilocus sequence data. *Mol. Biol. Evol.* **25**, 960-971 (2008).
- 35 Stamatakis, A. RAxML-VI-HPC: Maximum likelihood-based phylogenetic analyses with thousands of taxa and mixed models. *Bioinformatics* **22**, 2688-2690 (2006).
- 36 Lartillot, N., Lepage, T. & Blanquart, S. PhyloBayes 3: A Bayesian software package for phylogenetic reconstruction and molecular dating. *Bioinformatics* **25**, 2286-2288 (2009).
- 37 Near, T. J., Meylan, Peter A. & Shaffer, H. B. Assessing concordance of fossil calibration points in molecular clock studies: An example using turtles. *Am. Nat.* **165**, 137-146 (2005).
- 38 Gregory, T. R. A bird's-eye view of the c-value enigma: Genome size, cell size, and metabolic rate in the class Aves. *Evolution* **56**, 121-130 (2002).
- 39 Kraaijeveld, K. Genome size and species diversification. *Evol. Biol.* **37**, 227-233 (2010).
- 40 Felsenstein, J. Phylogenies and the comparative method. *Am. Nat.* **125**, 1-15 (1985).
- 41 R: A language and environment for statistical computing (R Foundation for Statistical Computing, Vienna, Austria, 2017).
- 42 Paradis, E., Claude, J. & Strimmer, K. APE: Analyses of phylogenetics and evolution in R language. *Bioinformatics* **20**, 289-290 (2004).
- 43 Lartillot, N. & Poujol, R. A phylogenetic model for investigating correlated evolution of substitution rates and continuous phenotypic characters. *Mol. Biol. Evol.* **28**, 729-744 (2011).
- 44 Kumar, S., Stecher, G. & Tamura, K. MEGA7: Molecular Evolutionary Genetics Analysis version 7.0 for bigger datasets. *Mol. Biol. Evol.* **33**, 1870-1874 (2016).
- 45 Revell, L. J. phytools: An R package for phylogenetic comparative biology (and other things). *Meth. Ecol. Evol.* **3**, 217-223 (2012).

- 46 Rambaut, A. & Grass, N. C. Seq-Gen: An application for the Monte Carlo simulation of DNA sequence evolution along phylogenetic trees. *Comput. Appl. Biosci.* **13**, 235-238 (1997).
- 47 Fong, J. J., Brown, J. M., Fujita, M. K. & Boussau, B. A phylogenomic approach to vertebrate phylogeny supports a turtle-archosaur affinity and a possible paraphyletic Lissamphibia. *PLoS ONE* **7**, e48990 (2012).
- 48 Hedges, S. B. & Poling, L. L. A molecular phylogeny of reptiles. *Science* **283**, 998-1001 (1999).
- 49 Shaffer, H. B., Meylan, P. & McKnight, M. L. Tests of turtle phylogeny: Molecular, morphological, and paleontological approaches. *Syst. Biol.* **46**, 235-268 (1997).
- 50 Benton, M. G., Donoghue, Philip C. J. & Asher, R. J. in *The Timetree of Life* (eds S. Blar Hedges & Sudhir Kumar) p. 35-86 (Oxford University Press, 2009).
- 51 Hurley, I. A. *et al.* A new time-scale for ray-finned fish evolution. *Proc. R. Soc. B-Biol. Sci.* **274**, 489-498 (2007).
- 52 Reisz, R. R. & Müller, J. Molecular timescales and the fossil record: A paleontological perspective. *Trends Genet.* **20**, 237-241 (2004).
- 53 Benton, M. J. & Donoghue, P. C. J. Paleontological evidence to date the Tree of Life. *Mol. Biol. Evol.* **24**, 26-53 (2007).
- 54 Graur, D. & Martin, W. Reading the entrails of chickens: Molecular timescales of evolution and the illusion of precision. *Trends Genet.* **20**, 80-86 (2004).
- 55 Müller, J. & Reisz, R. R. Four well-constrained calibration points from the vertebrate fossil record for molecular clock estimates. *Bioessays* **27**, 1069-1075 (2005).
- 56 Noonan, Brice P. & Chippindale, Paul T. Vicariant origin of Malagasy reptiles supports late Cretaceous antarctic land bridge. *Am. Nat.* **168**, 730-741 (2006).
- 57 Jones, M. *et al.* Integration of molecules and new fossils supports a Triassic origin for Lepidosauria (lizards, snakes, and tuatara). *BMC Evol. Biol.* **13**, 208 (2013).
- 58 Wesley, G. D. & Flynn, J. J. A revision of *Tapocyon* (Carnivoramorpha), including analysis of the first cranial specimens and identification of a new species. *J. Paleontol.* **77**, 769-783 (2003).
- 59 Rage, J. & Roček, Z. Redescription of *Triadobatrachus massinoti* (Piveteau, 1936) an anuran amphibian from the early Triassic. *Palaeontogr. Abt. A* **206**, 1-16 (1989).
- 60 Gao, K.-Q. & Shubin, N. H. Earliest known crown-group salamanders. *Nature* **422**, 424-428 (2003).
- 61 Evans, S. E., Milner, A. R. & Mussett, F. A discoglossid frog from the Middle Jurassic of England. *Palaeontology* **33**, 299-311 (1990).
- 62 Henrici, A. C. A new pipoid anuran from the late Jurassic Morrison formation at Dinosaur National Monument, Utah. *J. Vertebr. Paleontol.* **18**, 321-332 (1998).
- 63 Pitman III, W., Cande, S., LaBrecque, J. & Pindell, J. in *Biological relationships between Africa and South America* (ed P. Goldblatt) 405-439 (Yale University Press, 1993).
- 64 Heinicke, M. P., Naylor, G. J. P. & Hedges, S. B. in *The Timetree of Life* (eds S. Blar Hedges & Sudhir Kumar) p. 320-327 (Oxford University Press, 2009).
- 65 Chen, M. Y., Liang, D. & Zhang, P. Selecting question-specific genes to reduce incongruence in phylogenomics: A case study of jawed vertebrate backbone phylogeny. *Syst. Biol.* **64**, 1104-1120 (2015).
